# Supplementary material for: VE-CAM-S: Visual EEG-Based Grading of Delirium Severity and Associations With Clinical Outcomes
Source: PubMed Central journal article supplement — Crit Care Explor. 2022 Jan 18;4(1):e0611. doi: 10.1097/CCE.0000000000000611 (PMC8769081; doi:10.1097/cce.0000000000000611), 2022-01-18

## Supplemental Digital Content

---

### Supplemental Tables

**eTable 1:** Expanded information on questionnaire devised by the research team

**eTable 2:** Expanded information on the rules used for scoring the severity of CAM-S domains

**eTable 3:** Visual EEG features and model constraints

**eTable 4:** Look-up table that converts VE-CAM-S score to CAM-S LF score

**eTable 5:** VE-CAM-S performance on subsets

**eTable 6:** Adjusted odds ratios and p values of CAM-S LF & VE-CAM-S for predicting outcomes

**eTable 7:** Comparison of studies with EEG classification systems and their prognostic value

**eTable 8:** Comparison of selected EEG features and their prognostic value

### Supplemental References

### Supplemental Figures

**eFigure 1:** Flow diagram of subject enrollment

**eFigure 2:** Machine learning steps for model development

**eFigure 3:** Correlation among the EEG features

**eFigures 4 – 58:** EEG examples of normal, low, mid, high, and worst VE-CAM-S scores

- **eFigures 4 – 5:** Example EEG signals for 'Normal case' (VE-CAM-S = 0)
- **eFigure 6:** Example EEG signal for 'Low delirium severity' (VE-CAM-S = 1)
- **eFigures 7 – 9:** Example EEG signals for 'Low delirium severity' (VE-CAM-S = 3)
- **eFigures 10 – 12:** Example EEG signals for 'Moderate delirium severity' (VE-CAM-S = 4)
- **eFigures 13 – 21:** Example EEG signals for 'Moderate delirium severity' (VE-CAM-S = 5)
- **eFigures 22 – 28:** Example EEG signals for 'Moderate delirium severity' (VE-CAM-S = 6)
- **eFigure 29:** Example EEG signal for 'Moderate delirium severity' (VE-CAM-S = 7)
- **eFigures 30 – 35:** Example EEG signals for 'High delirium severity' (VE-CAM-S = 8)
- **eFigures 36 – 38:** Example EEG signals for 'High delirium severity' (VE-CAM-S = 9)
- **eFigures 39 – 43:** Example EEG signals for 'High delirium severity' (VE-CAM-S = 10)
- **eFigures 44 – 47:** Example EEG signals for 'High delirium severity' (VE-CAM-S = 14)
- **eFigures 48 – 58:** Example EEG signals for 'Worst delirium severity' (VE-CAM-S = 20)

---

Supplemental Digital Content file 1: eTables 1 – 8, Supplemental References, eFigures 1 – 19

Supplemental Digital Content file 2: eFigures 20 – 35

Supplemental Digital Content file 3: eFigures 36 – 51

Supplemental Digital Content file 4: eFigures 52 – 58

**VE-CAM-S: Supplemental Material**

**eTable 1:** Expanded information on questionnaire devised by the research team

| <b>Domain</b>                     | <b>Evaluator questions</b> <sup>a</sup> (based on pt. response); <sup>b</sup> (based on pt. response and RN input / chart review)                                                                                                                                                                                                                                                                                                                                               |                                                                                                                                                                                                                                                                                                                                                                                                                                 |
|-----------------------------------|---------------------------------------------------------------------------------------------------------------------------------------------------------------------------------------------------------------------------------------------------------------------------------------------------------------------------------------------------------------------------------------------------------------------------------------------------------------------------------|---------------------------------------------------------------------------------------------------------------------------------------------------------------------------------------------------------------------------------------------------------------------------------------------------------------------------------------------------------------------------------------------------------------------------------|
| Acute change / Fluctuating course | <ul style="list-style-type: none"> <li>▪ Acute onset / fluctuating course (0=N, 1=Y)</li> </ul>                                                                                                                                                                                                                                                                                                                                                                                 | <sup>a</sup> Also had: <ul style="list-style-type: none"> <li>▪ Felt confused in past day? (0=N, 1=Y)</li> <li>▪ Disoriented to place in past day? (0=N, 1=Y)</li> <li>▪ Observation (during eval.) (Each: 0=N, 1=Y):               <ul style="list-style-type: none"> <li>○ Fluct. LOC / Attention / Speech or thinking?</li> </ul> </li> <li>▪ Acute change in memory/thinking? (&lt;24h) / off baseline?</li> </ul>          |
| Attention                         | <ul style="list-style-type: none"> <li>▪ “SAVEAHAART” (Squeeze or tap on “A”)               <ul style="list-style-type: none"> <li><sup>a</sup> (Total errors (0-10), Missed A’s (0-4), Non-A taps (0-6))</li> <li><sup>b</sup> (Total errors: 0/1x, 2x, &gt;2x)</li> </ul> </li> <li>▪ DOW backwards?               <ul style="list-style-type: none"> <li><sup>a</sup> (0 =correct, 1= incorrect)</li> <li><sup>b</sup> (Total errors: 0x, 1x, &gt;1x)</li> </ul> </li> </ul> | <sup>a</sup> Also had: <ul style="list-style-type: none"> <li>▪ MOY backwards (0 =correct, 1= incorrect)</li> <li>▪ Digits backwards (3- , 4-digits) (each: 0=correct, 1=incorrect)</li> <li>▪ Observation (during eval.) (Each: 0=N, 1=Y):               <ul style="list-style-type: none"> <li>○ Trouble keeping track of things said?</li> <li>○ Inappropriately distracted by environmental stimuli?</li> </ul> </li> </ul> |
| Level of consciousness (LOC)      | <ul style="list-style-type: none"> <li>▪ RASS (-5 to +4)</li> </ul>                                                                                                                                                                                                                                                                                                                                                                                                             | <sup>a</sup> Also had: <ul style="list-style-type: none"> <li>▪ Observation (during eval.) (Each: 0=N, 1=Y):               <ul style="list-style-type: none"> <li>○ Sleepy?</li> <li>○ Stupor or coma?</li> <li>○ Hypervigilance?</li> </ul> </li> </ul>                                                                                                                                                                        |
| Thinking                          | <ul style="list-style-type: none"> <li>▪ 4 logic q’s (each: 0=correct, 1=incorrect):               <ol style="list-style-type: none"> <li>1) Will a stone float on water?</li> <li>2) Are there fish in the sea?</li> <li>3) Does 1lb weigh &gt; 2lbs?</li> <li>4) Can you use hammer to hit nail?</li> </ol> </li> </ul>                                                                                                                                                       | <sup>a</sup> Also had: <ul style="list-style-type: none"> <li>▪ Observation (during eval.) (Each: 0=N, 1=Y):               <ul style="list-style-type: none"> <li>○ Flow of ideas unclear / illogical?</li> <li>○ Conversation rambling / inappropriately verbose / tangential?</li> <li>○ Speech limited / sparse?</li> </ul> </li> </ul>                                                                                      |
| Orientation                       | <ul style="list-style-type: none"> <li>▪ Name? (0=correct, 1=incorrect)</li> <li>▪ Month? (0=correct, 1=incorrect)</li> <li>▪ Year ? (0=correct, 1=incorrect)</li> </ul>                                                                                                                                                                                                                                                                                                        | <sup>a</sup> Also had: <ul style="list-style-type: none"> <li>▪ Day? (0=correct, 1=incorrect)</li> </ul> <sup>b</sup> Also had: <ul style="list-style-type: none"> <li>▪ City? (0=correct, 1=incorrect)</li> <li>▪ Hosp. (MGH)? (0=correct, 1=incorrect)</li> </ul>                                                                                                                                                             |
| Memory                            | <ul style="list-style-type: none"> <li>▪ Memory recall (3-words)               <ul style="list-style-type: none"> <li><sup>a</sup> 0, 2, 5 min (each: 0=no errors, 1=any errors)</li> <li><sup>b</sup> 0, ~2 min (registration: 0 =correct, 1= incorrect; recall: # correct out of 3)</li> </ul> </li> </ul>                                                                                                                                                                    |                                                                                                                                                                                                                                                                                                                                                                                                                                 |
| Perceptual                        | <ul style="list-style-type: none"> <li>▪ Visual hallucinations in past day?               <ul style="list-style-type: none"> <li><sup>a</sup> (0=N, 1=Y)</li> <li><sup>b</sup> (UTA, 0=N, 1=Y)</li> </ul> </li> </ul>                                                                                                                                                                                                                                                           | <sup>b</sup> Also had: <ul style="list-style-type: none"> <li>▪ Auditory hallucinations in past day? (UTA, 0=N, 1=Y)</li> <li>▪ Feel unsafe / think someone is trying to harm you in past day? (UTA; 0=N, 1=Y)</li> </ul>                                                                                                                                                                                                       |
| Psychomotor                       | Observation (during eval.): <ul style="list-style-type: none"> <li>▪ Psychomotor agitation? (None, mild, major)</li> <li>▪ Psychomotor retardation? (None, mild, major)</li> </ul>                                                                                                                                                                                                                                                                                              |                                                                                                                                                                                                                                                                                                                                                                                                                                 |
| Sleep                             | <ul style="list-style-type: none"> <li>▪ Sleep quality in past day?               <ul style="list-style-type: none"> <li><sup>a</sup> (0=well, 1=not well)</li> <li><sup>b</sup> (UTA, none, mild or major problems)</li> </ul> </li> </ul>                                                                                                                                                                                                                                     |                                                                                                                                                                                                                                                                                                                                                                                                                                 |

<sup>a</sup> Collected for Subjects 001 – 208 (Aug 2015 – Dec 2016)

<sup>b</sup> Collected for Subjects 209 – 407 (Oct 2018 – Dec 2019)

## VE-CAM-S: Supplemental Material

**eTable 2:** Expanded information on the rules used for scoring the severity of CAM-S domains

| CAM-S Domain                                 | Severity scoring |                                                                                                                                                                                                                                                                                                                                                                                                                                                                                                                                               |
|----------------------------------------------|------------------|-----------------------------------------------------------------------------------------------------------------------------------------------------------------------------------------------------------------------------------------------------------------------------------------------------------------------------------------------------------------------------------------------------------------------------------------------------------------------------------------------------------------------------------------------|
| 1) Acute change / Fluct. course, 0-1         | <b>0</b>         | <b>0 = not present ; 1 = present</b>                                                                                                                                                                                                                                                                                                                                                                                                                                                                                                          |
|                                              | <b>1</b>         | <sup>a</sup> Y to any of the following observation q's: 'Fluct. LOC/Attention/Speech or thinking at eval.?', or 'Acute change in memory/thinking (<24h) / off baseline'<br><sup>b</sup> Y to 'Acute onset or fluct. course' (via eval. / RN input / Chart review)                                                                                                                                                                                                                                                                             |
| 2) Inattention, 0-2                          | <b>0</b>         | <b>0 = not present ; 1 = present (mild) ; 2 = present (marked)</b>                                                                                                                                                                                                                                                                                                                                                                                                                                                                            |
|                                              | <b>1</b>         | <sup>a</sup> If the following subject q's incorrect: 'DOW backwards', 'SAVEAHAART' (2 errors); or if Y to any of the following observation q's: 'Trouble keeping track of things said', 'Inappropriately distracted by environmental stimuli'<br><sup>b</sup> If the following subject q's incorrect: 'DOW backwards'(1 error); 'SAVEAHAART' (2 errors)                                                                                                                                                                                       |
|                                              | <b>2</b>         | <sup>a</sup> If the following subject q's incorrect: 'SAVEAHAART' (3+ errors)<br><sup>b</sup> If the following subject q's incorrect: 'DOW backwards'(2+ errors); 'SAVEAHAART'(3+ errors)                                                                                                                                                                                                                                                                                                                                                     |
| 3) Altered level of consciousness (LOC), 0-2 | <b>0</b>         | <b>0 = not present ; 1 = present (mild) ; 2 = present (marked)</b>                                                                                                                                                                                                                                                                                                                                                                                                                                                                            |
|                                              | <b>1</b>         | <sup>ab</sup> RASS $\pm 1 / 2$                                                                                                                                                                                                                                                                                                                                                                                                                                                                                                                |
|                                              | <b>2</b>         | <sup>ab</sup> RASS $\leq -3$ or $\geq +3$                                                                                                                                                                                                                                                                                                                                                                                                                                                                                                     |
| 4) Disorganized thinking, 0-2                | <b>0</b>         | <b>0 = not present ; 1 = present (mild) ; 2 = present (marked)</b>                                                                                                                                                                                                                                                                                                                                                                                                                                                                            |
|                                              | <b>1</b>         | <sup>a</sup> Combined # of errors (among 4 logic q's) = 1 ; or if Y to any of the following observation q's: 'Flow of ideas unclear / illogical', 'Conversation rambling / inappropriately verbose / tangential', 'Speech limited/sparse'<br><sup>b</sup> Combined # of errors (among 4 logic q's) = 1                                                                                                                                                                                                                                        |
|                                              | <b>2</b>         | <sup>ab</sup> Combined # of errors (among 4 logic q's) = 2+                                                                                                                                                                                                                                                                                                                                                                                                                                                                                   |
| 5) Disorientation, 0-2                       | <b>0</b>         | <b>0 = not present ; 1 = present (mild) ; 2 = present (marked)</b>                                                                                                                                                                                                                                                                                                                                                                                                                                                                            |
|                                              | <b>1</b>         | <sup>a</sup> 1 incorrect orientation domain (person/place/time): 'Name' (person) or 'Month / Year' (time)<br><sup>b</sup> 1 incorrect orientation domain (person/place/time): 'Name' (person) or 'City / Hosp.' (place) or 'Month / Year' (time)                                                                                                                                                                                                                                                                                              |
|                                              | <b>2</b>         | <sup>a</sup> 2 incorrect orientation domains (person/place/time): 'Name' (person) & 'Month / Year' (time)<br><sup>b</sup> 2-3 incorrect orientation domains (person/place/time): 'Name' (person), 'City / Hosp.' (place), 'Month / Year' (time)                                                                                                                                                                                                                                                                                               |
| 6) Memory impairment, 0-2                    | <b>0</b>         | <b>0 = not present ; 1 = present (mild) ; 2 = present (marked)</b>                                                                                                                                                                                                                                                                                                                                                                                                                                                                            |
|                                              | <b>1</b>         | <sup>a</sup> If 'Memory registration (0-min)' correct + 'Memory recall (2-min and 5-min)' incorrect<br><sup>b</sup> If 'Memory registration (0-min)' correct + 'Memory recall (~2min)' incorrect (2/3 words missed)                                                                                                                                                                                                                                                                                                                           |
|                                              | <b>2</b>         | <sup>a</sup> If 'Memory registration (0-min)' incorrect + 'Memory recall (2-min and 5-min)' incorrect<br><sup>b</sup> If 'Memory registration (0-min)' in/correct + 'Mem. recall (~2min)' incorrect (3/3 words missed)                                                                                                                                                                                                                                                                                                                        |
| 7) Perceptual disturbances, 0-2              | <b>0</b>         | <b>0 = not present ; 1 = present (mild) ; 2 = present (marked)</b>                                                                                                                                                                                                                                                                                                                                                                                                                                                                            |
|                                              | <b>1</b>         | <sup>a</sup> Y to the following subject q.: 'In past day, see things not there? (visual hallucination) (mild)<br><sup>b</sup> Y to 1 of the following subject q.'s: 'In past day, 'see' / 'hear' things not there?', 'In past day, feel unsafe / someone trying to harm you (paranoia)?' [or indicated via RN input/chart review]                                                                                                                                                                                                             |
|                                              | <b>2</b>         | <sup>a</sup> Y to the following subject q.: 'In past day, see things not there? (visual hallucination) (major)<br><sup>b</sup> Y to 2+ of the following subject q.'s: 'In past day, 'see' / 'hear' things not there?', 'In past day, feel unsafe / someone trying to harm you (paranoia)?' [or indicated via RN input/chart review] (If only 1 of the above, may also count if found to be more severe / dramatic)                                                                                                                            |
| 8) Psychomotor agitation, 0-2                | <b>0</b>         | <b>0 = not present ; 1 = present (mild) ; 2 = present (marked)</b>                                                                                                                                                                                                                                                                                                                                                                                                                                                                            |
|                                              | <b>1</b>         | <sup>ab</sup> Observational (mild) or if RASS +1                                                                                                                                                                                                                                                                                                                                                                                                                                                                                              |
|                                              | <b>2</b>         | <sup>ab</sup> Observational (major) or if RASS $\geq +2$                                                                                                                                                                                                                                                                                                                                                                                                                                                                                      |
| 9) Psychomotor retardation, 0-2              | <b>0</b>         | <b>0 = not present ; 1 = present (mild) ; 2 = present (marked)</b>                                                                                                                                                                                                                                                                                                                                                                                                                                                                            |
|                                              | <b>1</b>         | <sup>ab</sup> Observational (mild) or if RASS -2/-3                                                                                                                                                                                                                                                                                                                                                                                                                                                                                           |
|                                              | <b>2</b>         | <sup>ab</sup> Observational (major) or if RASS -4/-5                                                                                                                                                                                                                                                                                                                                                                                                                                                                                          |
| 10) Altered sleep-wake cycle, 0-2            | <b>0</b>         | <b>0 = not present ; 1 = present (mild) ; 2 = present (marked)</b>                                                                                                                                                                                                                                                                                                                                                                                                                                                                            |
|                                              | <b>1</b>         | <sup>a</sup> If the following subject q. 'Sleep quality in past day?' = not well (mild)<br><sup>b</sup> If the following subject q. 'Sleep quality in past day?' = problematic, mild (e.g. falling/waking/excessive daytime sleepiness w. insomnia at night, nightmares) [or indicated via RN/ chart]                                                                                                                                                                                                                                         |
|                                              | <b>2</b>         | <sup>a</sup> If the following subject q. 'Sleep quality last night?' = not well (major); if RASS -4/-5<br><sup>b</sup> If the following subject q. 'Sleep quality in past day?' = problematic, major (e.g falling/waking/excessive daytime sleepiness w. insomnia at night, nightmares) [or indicated via RN/chart]; RASS -4/-5; or sedated overnight/at eval.<br><br><sup>b</sup> If pt. rated sleep good and per RN/Chart disturbances were present – points assigned; if pt. endorsed poor sleep but undisturbed per RN – points retained. |

<sup>a</sup> Collected for Subjects 001 – 208 (Aug 2015 – Dec 2016)

<sup>b</sup> Collected for Subjects 209 – 407 (Oct 2018 – Dec 2019)

## VE-CAM-S: Supplemental Material

**eTable 3:** Visual EEG features and model constraints

| Type                                     | Feature <sup>c</sup>                                                                                                                                         | Model Sign Constraint |
|------------------------------------------|--------------------------------------------------------------------------------------------------------------------------------------------------------------|-----------------------|
| <b>Background / Rhythm Abnormalities</b> | Absent sleep transients (Spindles, K-complexes, Vertex waves)                                                                                                | + or 0                |
|                                          | Asymmetry                                                                                                                                                    | + or 0                |
|                                          | Lateralized Rhythmic Delta Activity (LRDA)                                                                                                                   | + or 0                |
|                                          | Generalized Rhythmic Delta Activity (GRDA)                                                                                                                   | + or 0                |
|                                          | Generalized (G) / Diffuse Delta Slowing                                                                                                                      | + or 0 <sup>a</sup>   |
|                                          | Generalized (G) / Diffuse Theta Slowing                                                                                                                      | + or 0 <sup>a</sup>   |
|                                          | Intermittent brief attenuation (IBA)                                                                                                                         | + or 0                |
|                                          | Low voltage: Moderate (MLV; <20 $\mu$ V)                                                                                                                     | + or 0                |
|                                          | Low voltage: Extreme (ELV) / Electrocerebral Silence (ECS)                                                                                                   | W <sup>b</sup>        |
|                                          | Extreme Delta Brush (EDB)                                                                                                                                    | W <sup>b</sup>        |
|                                          | Burst Suppression (BS) with epileptiform activity                                                                                                            | W <sup>b</sup>        |
|                                          | Burst Suppression without epileptiform activity                                                                                                              | W <sup>b</sup>        |
|                                          | Unreactive EEG                                                                                                                                               | W <sup>b</sup>        |
| <b>Seizure Activity</b>                  | Generalized Nonconvulsive Status Epilepticus (G-NCSE)                                                                                                        | W <sup>b</sup>        |
| <b>Periodic Discharges</b>               | Generalized Periodic Discharges (GPDs, with or without triphasic morphology), or Triphasic Waves (TWs), or Bilateral Independent Periodic Discharges (BIPDs) | +                     |
|                                          | Lateralized Periodic Discharges (LPDs)                                                                                                                       | + or 0                |

<sup>a</sup> EEG slowing was scored based on a patient's best awake background

<sup>b</sup> Always predict worst delirium severity

<sup>c</sup> Features coded but not included in the model: Absence of a normal Posterior Dominant Rhythm (PDR); Excess / Diffuse Alpha; Excess / Diffuse Beta; Sporadic discharges (focal or generalized); Brief Potentially Ictal Rhythmic Discharges (BIRDs); Discrete Seizures (focal (F) or generalized (G)), Focal Nonconvulsive Status Epilepticus (F NCSE)

## VE-CAM-S: Supplemental Material

**eTable 4:** Look-up table that converts VE-CAM-S score to CAM-S LF score

| <b>VE-CAM-S<br/>(0-20)</b> | <b>CAM-S LF<br/>(0-19)</b> | <b>GOS≤3 at<br/>discharge (%)</b> | <b>In-hospital<br/>Mortality (%)</b> | <b>3-month<br/>Mortality (%)</b> |
|----------------------------|----------------------------|-----------------------------------|--------------------------------------|----------------------------------|
| 0                          | 0                          | 47                                | 7                                    | 12                               |
| 1                          | 1                          | 52                                | 8                                    | 14                               |
| 2                          | 2,3                        | 56                                | 9                                    | 16                               |
| 3                          | 4,5,6                      | 61                                | 11                                   | 18                               |
| 4                          | 7,8,9                      | 65                                | 12                                   | 21                               |
| 5                          | 10,11                      | 69                                | 14                                   | 23                               |
| 6                          | 12,13                      | 73                                | 16                                   | 26                               |
| 7                          | 14,15                      | 76                                | 18                                   | 29                               |
| 8                          | 15+                        | 80                                | 21                                   | 33                               |
| 9                          | 15+                        | 83                                | 24                                   | 36                               |
| 10                         | 15+                        | 85                                | 27                                   | 39                               |
| 11                         | 15+                        | 88                                | 30                                   | 43                               |
| 12                         | 15+                        | 90                                | 34                                   | 46                               |
| 13                         | 15+                        | 91                                | 37                                   | 49                               |
| 14                         | 15+                        | 93                                | 41                                   | 53                               |
| 15                         | 15+                        | 94                                | 45                                   | 56                               |
| 16                         | 15+                        | 95                                | 49                                   | 59                               |
| 17                         | 15+                        | 96                                | 53                                   | 62                               |
| 18                         | 15+                        | 96                                | 57                                   | 65                               |
| 19                         | 15+                        | 97                                | 61                                   | 67                               |
| 20                         | 15+                        | 97                                | 65                                   | 70                               |

**VE-CAM-S: Supplemental Material**

**eTable 5:** VE-CAM-S performance on subsets

| <b>Subset</b>          | <b>N</b> | <b>Spearman's correlation R</b> | <b>AUC (≤4 vs. ≥5)</b> | <b>Calibration slope (≤4 vs. ≥5)</b> |
|------------------------|----------|---------------------------------|------------------------|--------------------------------------|
| Young (<40y)           | 65       | 0.79 (0.68 – 0.86)              | 0.92 (0.84 – 0.98)     | 1.34 (0.99 – 1.60)                   |
| Middle-aged (40 – 59y) | 118      | 0.78 (0.70 – 0.84)              | 0.87 (0.80 – 0.93)     | 0.90 (0.71 – 1.30)                   |
| Old (≥60y)             | 224      | 0.52 (0.41 – 0.62)              | 0.80 (0.73 – 0.87)     | 0.84 (0.55 – 1.10)                   |
| Male                   | 235      | 0.68 (0.59 – 0.75)              | 0.89 (0.84 – 0.94)     | 1.11 (0.93 – 1.33)                   |
| Female                 | 172      | 0.67 (0.58 – 0.75)              | 0.82 (0.76 – 0.89)     | 0.90 (0.63 – 1.15)                   |
| White                  | 321      | 0.66 (0.59 – 0.73)              | 0.85 (0.80 – 0.89)     | 0.97 (0.80 – 1.17)                   |
| Black                  | 36       | 0.67 (0.40 – 0.86)              | 0.89 (0.74 – 0.99)     | 1.32 (0.71 – 1.71)                   |
| ICU patients           | 175      | 0.51 (0.39 – 0.61)              | 0.87 (0.76 – 0.94)     | 0.69 (0.29 – 1.04)                   |
| Non-ICU patients       | 232      | 0.55 (0.45 – 0.63)              | 0.81 (0.75 – 0.86)     | 0.99 (0.79 – 1.24)                   |
| Non-comatose           | 277      | 0.53 (0.43 – 0.61)              | 0.79 (0.74 – 0.84)     | 0.99 (0.78 – 1.18)                   |

## VE-CAM-S: Supplemental Material

**eTable 6:** Adjusted odds ratios and p values of CAM-S LF & VE-CAM-S for predicting outcomes

| <b>Outcome</b>            | <b>Score</b> | <b>Odds ratio when score increases by 1</b> | <b>p</b> |
|---------------------------|--------------|---------------------------------------------|----------|
| GOS $\leq$ 3 at discharge | CAM-S LF     | 1.22 (1.18 – 1.27)                          | <0.001   |
|                           | VE-CAM-S     | 1.19 (1.12 – 1.36)                          | <0.001   |
| In-hospital mortality     | CAM-S LF     | 1.41 (1.26 – 1.82)                          | <0.001   |
|                           | VE-CAM-S     | 1.20 (1.15 – 1.27)                          | <0.001   |
| 3-month mortality         | CAM-S LF     | 1.20 (1.15 – 1.26)                          | <0.001   |
|                           | VE-CAM-S     | 1.14 (1.10 – 1.19)                          | <0.001   |

VE-CAM-S: Supplemental Material

**eTable 7:** Comparison of studies with EEG classification systems and their prognostic value

| Article <sup>a</sup>                         | Study Type                          | Study Population                                               | Scale Type                                   | Sample Size            | Outcomes Evaluated                    | Association with Outcome                                                                                                    |
|----------------------------------------------|-------------------------------------|----------------------------------------------------------------|----------------------------------------------|------------------------|---------------------------------------|-----------------------------------------------------------------------------------------------------------------------------|
| <i>Bickford (1955)</i> <sup>1</sup>          | Prospective                         | Hepatic coma; pts. w. cirrhosis w/o mental change              | Nominal                                      | 21 patients            | Mortality, Cognitive                  | <i>Qualitative</i>                                                                                                          |
| <i>Parsons-Smith (1957)</i> <sup>2</sup>     | Prospective                         | Liver dz & varying degrees of neuropsych disturbance           | Grading scale (Parsons-Smith), Ordinal       | 66 patients (157 EEGs) | Cognitive (neuropsychiatric state)    | <i>Qualitative</i>                                                                                                          |
| <i>Silverman (1962)</i> <sup>3</sup>         | Retrospective                       | Impending or actual hepatic coma                               | Nominal                                      | 53 patients (123 EEGs) | Consciousness, clinical status        | <i>Qualitative</i>                                                                                                          |
| <i>Hockaday (1965)</i> <sup>4</sup>          | Retrospective, cohort study         | Coma w. acute cardiac arrest or total apnea                    | Grading scale (Hockaday), Ordinal            | 39 patients            | Mortality                             | <i>Qualitative</i>                                                                                                          |
| <i>Bergamasco (1968)</i> <sup>5</sup>        | Prospective                         | Post-traumatic coma                                            | Nominal                                      | 18 patients            | Mortality / coma recovery             | <i>Qualitative</i>                                                                                                          |
| <i>Binnie (1970)</i> <sup>6</sup>            | Retrospective                       | Anoxic injury after CPR post-cardiac arrest                    | Grading scale (Binnie), Ordinal              | 41 patients (93 EEGs)  | Mortality                             | <i>Qualitative</i>                                                                                                          |
| <i>Hughes (1976)</i> <sup>7</sup>            | Prospective                         | Anoxic, traumatic (cerebrally unresp., coma)                   | Grading scale (Hughes), Ordinal              | 63 patients (345 EEGs) | Neuro status                          | <i>P-value</i> (btw EEG index and Neuro index, $p < 0.0001$ )                                                               |
| <i>Karnaze (1984)</i> <sup>8</sup>           | Cohort (retrospective, prospective) | EEG showing TWs                                                | Nominal                                      | 50 patients            | Mortality, consciousness              | <i>Qualitative</i>                                                                                                          |
| <i>Sundaram (1987)</i> <sup>9</sup>          | Retrospective                       | Encephalopathy & TWs                                           | Nominal                                      | 63 patients (66 EEGs)  | Mortality                             | <i>Qualitative</i>                                                                                                          |
| <i>Scollo-Lavizzari (1987)</i> <sup>10</sup> | Retrospective                       | Post-anoxic coma after cardiac arrest                          | Grading scale (SL-Basetti), Ordinal          | 26 patients            | Mortality                             | <i>Qualitative</i>                                                                                                          |
| <i>Synek (1988)</i> <sup>11</sup>            | N/A                                 | Adults w. traumatic & anoxic coma                              | Grading scale (Synek), Ordinal               | N/A                    | Mortality                             | <i>Qualitative</i>                                                                                                          |
| <i>Bahamon-Dussan (1989)</i> <sup>12</sup>   | Retrospective                       | EEGs in which TWs were prominent pattern occupying $\geq 35\%$ | Nominal                                      | 30 patients            | Mortality, Neurological               | <i>Qualitative</i>                                                                                                          |
| <i>Rae-Grant (1991)</i> <sup>13</sup>        | Retrospective                       | Posttraumatic pts, coma                                        | Grading scale (Rae-Grant), Interval          | 57 patients            | Neurological / Functional (GOS) [d/c] | <i>Pearson's</i> (correlation = 0.516, $p = 0.0001$ for dichotomous EEG score w. GOS)                                       |
| <i>Young (1992)</i> <sup>14</sup>            | Prospective                         | Septic encephalopathy (positive blood cultures), Age >16       | Grading scale, Ordinal                       | 62 patients            | Mortality                             | <i>P-value</i> (mortality varied w. encephalopathic category, $p < 0.001$ ; EEG classifications across grps, $p < 0.0001$ ) |
| <i>Yamashita (1995)</i> <sup>15</sup>        | Retrospective                       | ICU pts w. anoxic encephalopathy post-CPR                      | Grading scale (Hockaday - modified), Ordinal | 79 patients            | Mortality, Neurological               | <i>Qualitative</i>                                                                                                          |
| <i>Young (1996)</i> <sup>16</sup>            | Retrospective                       | NICU pts w. NCS undergoing cEEG                                | Nominal                                      | 49 patients            | Mortality / disabled / d.c home       | <i>OR</i> (Sz duration assoc. w. incr. mortality, $p = .0057$ ; $OR = 1.131/h$ )                                            |



### VE-CAM-S: Supplemental Material

| Article <sup>a</sup>                 | Study Type                            | Study Population                                                     | Scale Type                                      | Sample Size             | Outcomes Evaluated                                                            | Association with Outcome                                                                                                                                     |
|--------------------------------------|---------------------------------------|----------------------------------------------------------------------|-------------------------------------------------|-------------------------|-------------------------------------------------------------------------------|--------------------------------------------------------------------------------------------------------------------------------------------------------------|
| <i>Young (1997)</i> <sup>17</sup>    | Retrospective                         | Coma in general ICU; Age >16; coma onset 24-72h prior to EEG         | Grading scale (Young), Ordinal                  | 92 patients (100 EEGs)  | Inter-observer reliability w. Synek scale                                     | <i>Kappa score</i> (K=0.90 for our system and 0.75 for Synek)                                                                                                |
| <i>Litt (1998)</i> <sup>18</sup>     | Prospective                           | ICU pts w. NCSE on EEG; Age ≥ 65                                     | Nominal                                         | 24 patients             | Mortality                                                                     | <i>P-value</i> (death assoc. w. generalized NCSE, p = 0.017)                                                                                                 |
| <i>Young (1999)</i> <sup>19</sup>    | Retrospective                         | Comatose pts in general ICU                                          | Grading scale (Young), Ordinal                  | N/A                     | Mortality                                                                     | <i>OR, PPV</i> (Suppression, no reactivity strongly related to mortality; PPV >0.80, OR >2.0; focal epil. act., regional delta, reactivity favored survival) |
| <i>Amodio (1999)</i> <sup>20</sup>   | Prospective                           | Cirrhotic pts. w/o overt encephalopathy or grade1                    | Grading scale (Parsons-Smith modified), Ordinal | 32 patients (43 EEGs)   | Cognitive (psychometric)                                                      | <i>Spearman's</i> (R = 0.57 P=0.004 and R=0.42 P=0.4, grader A & B, respectively).                                                                           |
| <i>Claassen (2006)</i> <sup>21</sup> | Prospective                           | Critically ill, w. SAH undergoing cEEG in ICU                        | Nominal                                         | 116 patients            | Neurological / Functional (mRS) [3mo-post SAH]                                | <i>OR, PPV, NPV</i> (poor outcome assoc. w. absence of sleep architecture, OR=4.3, 95%-CI 1.1-17.2, & presence of PLEDs, OR=18.8, 95%-CI 1.6-214.6)          |
| <i>Claassen (2007)</i> <sup>22</sup> | Retrospective                         | Nontraumatic spont. ICH undergoing cEEG                              | Nominal                                         | 102 patients            | Mortality, Neurological/ Functional (GOS) [d/c]                               | <i>OR</i> (PEDs were indep. assoc. w. poor outcome, OR 7.6, 95% CI 2.1 to 27.3)                                                                              |
| <i>Watson (2008)</i> <sup>23</sup>   | Post-hoc: prospective, observ. cohort | Critically ill, mechanically ventilated in MICU, Age ≥ 18            | Nominal                                         | 125 patients            | Mortality [ICU, hosp., 6mo], LOS [ICU, 1 <sup>st</sup> vent, hosp., post-ICU] | <i>HR</i> (pts w. burst suppression had stat. sig. higher 6-mo. mortality, HR = 2.04, p = 0.02)                                                              |
| <i>Oddo (2009)</i> <sup>24</sup>     | Retrospective                         | MICU pts undergoing cEEG; no acute neurological injuries             | Nominal                                         | 201 patients            | Mortality, Neurological / Functional (GOS) [d/c]                              | <i>OR</i> (ESZs or PEDs was assoc. w. death or severe disability at hosp. d/c, OR 19.1, p < 0.001)                                                           |
| <i>Roest (2009)</i> <sup>25</sup>    | Retrospective, cohort study           | Adult ICU pts w. post-anoxic coma                                    | Grading scale (Synek, Young; Revised), Ordinal  | 115 patients (174 EEGs) | Mortality, Neurological/ Functional (GOS) [30,180d]                           | <i>HR</i> (Rev. Young classification, derived from EEG at d1-5, was most predictive, HR=2.06; P=0.006; 95% CI=1.52-3.52)                                     |
| <i>Bagnato (2010)</i> <sup>26</sup>  | Prospective                           | Impaired consciousness post-coma, LCF ≤4; no anoxic encephalopathies | Grading scale (Synek), Ordinal                  | 46 patients             | Cognitive (LCF)                                                               | <i>Spearman's</i> (sig. correl. btw Synek scores & LCF scores, at admission, & LCF variation in pts w. TBIs, r = -0.53; p < 0.01)                            |
| <i>Boccagni (2011)</i> <sup>27</sup> | Prospective                           | Impaired consciousness post-anoxic coma                              | Grading scale (Synek), Ordinal                  | 15 patients             | Cognitive (LCF)                                                               | <i>Spearman's</i> (Synek score sig. correl. w. LCF at admit (r = -0.69; p=0.004); Synek score sig. correl. w. changes in LCF at 3mo, r = -0.86; p<0.001)     |
| <i>Logi (2011)</i> <sup>28</sup>     | Retrospective                         | Unconscious pts w. TBI / CVD / anoxia; GCS ≤8, LCF ≤2                | Grading scale (Synek), Ordinal                  | 50 patients             | Mortality, Cognitive (LCF)                                                    | <i>OR</i> (Synek malignant vs uncertain: OR 0.13; EEG-R = good (+) factor for prognosis of recovery of consciousness)                                        |

**VE-CAM-S: Supplemental Material**

| <b>Article <sup>a</sup></b>                  | <b>Study Type</b>                          | <b>Study Population</b>                                        | <b>Scale Type</b>                                 | <b>Sample Size</b>        | <b>Outcomes Evaluated</b>                                                    | <b>Association with Outcome</b>                                                                                                                                                                                  |
|----------------------------------------------|--------------------------------------------|----------------------------------------------------------------|---------------------------------------------------|---------------------------|------------------------------------------------------------------------------|------------------------------------------------------------------------------------------------------------------------------------------------------------------------------------------------------------------|
| <i>Foreman (2012)</i> <sup>29</sup>          | Retrospective, case-control                | Pts w. GPDs, Age > 18                                          | Nominal                                           | 200 patients              | Mortality, LOS, Neurological/ Functional (GOS)                               | <i>P-value</i> (GPDs assoc. w. incr. mortality on univariate analysis, p=0.049, but not multivariate)                                                                                                            |
| <i>Kamel (2013)</i> <sup>30</sup>            | Retrospective, cohort study                | No acute brain injury w. cEEG in MICU/SICU                     | Nominal                                           | 105 patients              | LOS, Neurological / Functional (GOS) [d/c]                                   | <i>OR</i> (ESz assoc. w. lower odds of good outcomes on GOS at d/c, <i>OR</i> 0.3, 95 % <i>CI</i> 0.1–0.8)                                                                                                       |
| <i>Polito (2013)</i> <sup>31</sup>           | Prospective, observational                 | Septic shock w. acute brain dysfunction in MICU / SICU, Age<80 | Grading scale (Synek), Ordinal                    | 71 patients (47 with EEG) | Mortality, LOS [ICU, hosp.], Neurological/ Functional (GOS) [6mo]            | <i>P-value</i> (Grade 3 was significantly more frequent in pts who died, p=0.001)                                                                                                                                |
| <i>Kurtz (2014)</i> <sup>32</sup>            | Retrospective                              | SICU pts w. unexplained AMS undergoing cEEG                    | Nominal                                           | 154 patients              | Mortality, Neurological / Functional (GOS) [d/c]                             | <i>OR</i> (NCSz were indep. assoc. w. poor outcome; <i>OR</i> 10.4, 95%- <i>CI</i> 1.0-53.7; p=0.039)                                                                                                            |
| <i>Rossi Sebastiano (2015)</i> <sup>33</sup> | Prospective                                | Chronic disorders of consciousness; adult                      | Grading scale (Synek; arbitrary - sleep), Ordinal | 142 patients              | Coma Recovery Scale-Revised (CRS-R)                                          | <i>P-value, Cluster analysis</i>                                                                                                                                                                                 |
| <i>Alvarez (2015)</i> <sup>34</sup>          | Prospective, observational cohort study    | Status epilepticus undergoing cEEG, Age > 16                   | Nominal                                           | 120 patients              | Mortality, complete clinical recovery [d/c]                                  | <i>AUC, OR</i> (No PDR, <i>OR</i> 9.8; p = 0.033, w. mortality; changes in SII sleep, <i>OR</i> 2.59; p = 0.002, for complete recovery; <i>AUC</i> using PDR & STESS to predict mortality = 0.79)                |
| <i>Gilmore (2015)</i> <sup>35</sup>          | Prospective, observational                 | MICU pts w. severe sepsis and multi-organ dysfunction          | Nominal                                           | 98 patients               | Mortality, Neurological / Functional (mRS), Cognitive (TICS) [d/c, 6mo, 1yr] | <i>P-value</i> (No reactivity assoc. w. higher 1y mortality, p=0.002; No reactivity, NCS or PD not assoc. w. functional outcome; no assoc. btw NCSE, NCS, PD, or no reactivity & cog. outcome)                   |
| <i>Azabou (2015)</i> <sup>36</sup>           | Prospective, observational                 | ICU pts w. sepsis, Age ≥ 18                                    | Grading scale (Synek; Young), Ordinal             | 110 patients              | Mortality [ICU, hosp.]; Severity of sepsis / sedation / neuro status         | <i>OR</i> (No reactivity, delta-predominant background, PDs, Synek≥3 and Young >1 were indep. predictors of ICU mortality: <i>OR</i> = 4.44, 3.36, 3.24, 5.35, 3.44; & were assoc. w. occurrence of delirium)    |
| <i>Azabou (2016)</i> <sup>37</sup>           | Prospective, cohort study                  | Post-anoxic coma pts in the ICU; >24hrs unconscious after CPR  | Nominal; Grading scale (Synek) - Ordinal          | 61 patients               | Mortality, Neurological / Functional (mGOS) [1y post-coma onset]             | <i>AUC, PPV, NPV</i> ('Isoelectric, discontinuous, delta dominant, paroxysms, nonreactive' for predicting an unfavorable outcome w. <i>AUC</i> 0.53, 0.59, 0.63, 0.51, 0.82 respectively; Synek score >3 = 0.81) |
| <i>Sutter (2016)</i> <sup>38</sup>           | Retrospective, observational, cohort study | Acute non-hypoxic encephalopathy; neuro /med/surg ICUs; Age≥18 | Nominal                                           | 262 patients              | Mortality [in-hospital]                                                      | <i>RR, HR</i> (Nonreactive, P<.0001, was indep. assoc. w. death & strongest predictor, <i>RR</i> 3.74)                                                                                                           |

## VE-CAM-S: Supplemental Material

| Article <sup>a</sup>                  | Study Type                                | Study Population                                                                                       | Scale Type                    | Sample Size  | Outcomes Evaluated                                                         | Association with Outcome                                                                                                                                                                  |
|---------------------------------------|-------------------------------------------|--------------------------------------------------------------------------------------------------------|-------------------------------|--------------|----------------------------------------------------------------------------|-------------------------------------------------------------------------------------------------------------------------------------------------------------------------------------------|
| <i>Knauert (2018)</i> <sup>39</sup>   | Retrospective, observational cohort study | MICU pts undergoing cEEG; no primary acute brain injury                                                | Grading scale(Synek), Ordinal | 93 patients  | Mortality [hosp.], LOS [ICU, hosp.], Neurological / Functional (mRS) [d/c] | OR (w/o K-complexes, OR 18.8 (p=0.046); or w/o sleep spindles, OR 6.3 (p=0.036) incr. odds of death); Longer LOS (ICU): no K-complexes (p=.01), no sleep spindles, p=0.02)                |
| <i>Nielsen (2020)</i> <sup>40</sup>   | Prospective, observational                | MICU pts w/o acute primary CNS dz and w. sepsis / septic shock / mono- or multi-organ failure; Age >18 | Nominal                       | 102 patients | Mortality [ICU, hosp., post-d/c], Cognitive (delirium)                     | HR (Preserved cEEG reactivity during all instances of arousal was only stat. significant marker for reduced mortality, HR 0.4; 95% CI 0.2–0.9; P<0.05, and preservation of cognitive fxn) |
| <i>Kaplan (2004)</i> <sup>41</sup>    | Review                                    | Metabolic encephalopathy & coma                                                                        | N/A                           | N/A          | N/A                                                                        | N/A                                                                                                                                                                                       |
| <i>Hosokawa (2014)</i> <sup>42</sup>  | Systematic Review                         | Sepsis-associated encephalopathy; Age≥18                                                               | N/A                           | N/A          | N/A                                                                        | N/A                                                                                                                                                                                       |
| <i>Herman (2015)</i> <sup>43</sup>    | Consensus Statement                       | Critically ill adults/child w. encephalopathy on EEG                                                   | N/A                           | N/A          | N/A                                                                        | N/A                                                                                                                                                                                       |
| <i>Sutter (2015)</i> <sup>44</sup>    | Review                                    | ICU pts w. acute non-hypoxic encephalopathy; Age ≥ 18                                                  | N/A                           | N/A          | N/A                                                                        | N/A                                                                                                                                                                                       |
| <i>Palanca (2017)</i> <sup>45</sup>   | Review                                    | Post-op delirium                                                                                       | N/A                           | N/A          | N/A                                                                        | N/A                                                                                                                                                                                       |
| <i>Gillinder (2019)</i> <sup>46</sup> | Systematic Review                         | Pts w. anti-NMDA receptor encephalitis                                                                 | N/A                           | N/A          | N/A                                                                        | N/A                                                                                                                                                                                       |

<sup>a</sup> **Search strategy and selection criteria:** We conducted a literature search in PubMed including articles published from 1 January 1955 to 1 April 2019. The following search syntax was used: (((Electroencephalogram OR Electroencephalography OR EEG)) AND (Encephalopathy OR Delirium OR Coma)) AND (Outcome OR Prognosis OR Mortality OR Morbidity OR Disability). Results were restricted to human studies with full text available. The reference lists of review articles were also checked for relevant studies. The results were screened based on clinical relevance, with a focus on papers which reported clinical outcomes in patients with a form of (acute) encephalopathy undergoing EEG. We excluded studies on pediatric patients, studies that recorded EEG exclusively intraoperatively, and studies with 10 or fewer subjects. The studies are separated by type (Primary vs Review) and sorted by year of publication.

## VE-CAM-S: Supplemental Material

### Evidence before this study:

We conducted a literature search in PubMed including articles published from 1 January 1955 to 1 April 2019. The following search syntax was used: (((Electroencephalogram OR Electroencephalography OR EEG)) AND (Encephalopathy OR Delirium OR Coma)) AND (Outcome OR Prognosis OR Mortality OR Morbidity OR Disability). Results were restricted to human studies with full text available. The reference lists of review articles were also checked for relevant studies. The results were screened based on clinical relevance, with a focus on papers which reported clinical outcomes in patients with a form of (acute) encephalopathy undergoing EEG. We excluded studies on pediatric patients, studies that recorded EEG exclusively intraoperatively, and studies with 10 or fewer subjects.

We identified 6 reviews or consensus statements and 40 primary articles. Primary articles studied a mean of 82.3 patients (range 15-262, standard deviation 55.5). 19 studies explicitly studied ICU patients, 14 studied patients with coma, 10 studied patients post-cardiac arrest or anoxia, 5 studied patients with sepsis, 5 studied patients with hepatic failure, and 5 studied patients with trauma. Nominal scales, characterizing primarily the presence or absence of features, were used in 19 primary articles. Ordinal grading scales were used in 20 primary articles, with the most common being those based on prior work by Synek and Young. Only 1 primary article by Rae-Grant et al. described an interval scale, to characterize the severity of head injury in 57 patients using dichotomous variables of EEG features, which correlated with the Glasgow Outcome Score. Therefore, most past studies have been based on fewer than 100 patients and there is a marked paucity of interval-based EEG grading systems to predict multiple clinical outcomes.

### Added value of this study:

Our study is the largest to date to develop a grading scale using visually assessed EEG findings. We used machine learning on a comprehensive set of visually assessable EEG features in a large and heterogeneous clinical cohort to develop the Visual EEG CAM-S (VE-CAM-S), a physiologic grading scale. VE-CAM-S is a physiological delirium grading scale for delirium and underlying encephalopathy. VE-CAM-S was validated in terms of its association with clinical outcomes, even after adjusting for age and sex, and with similar predictive value as the clinical CAM-S, age, and sex.

### Implications of all the available evidence:

Collectively, the evidence suggests that even routine EEG findings can quantify delirium severity in a prospective, heterogeneous cohort with a wide spectrum of clinical disease, and provide additional information regarding important clinical outcomes. While there is an important role for quantitative analysis of EEG data, routine EEG can already serve as a valuable biomarker for delirium severity and may improve assessment across multiple clinical contexts. The consistency of identified EEG findings across multiple studies and contexts also suggests that further research is needed to identify the fundamental brain circuits giving rise to these prognostically important findings in order to develop new targeted therapies for neurocognitive vulnerability.

VE-CAM-S: Supplemental Material

eTable 8: Comparison of selected EEG features and their prognostic value

| EEG Feature                                                                                                                                                 | Clinical outcomes                                                                                                                                                                                                                                                                                                              | Associated literature                                                                                                                                                                                                                                                                                                                                                                                                                                                                                                                                                                                                                                                                                                                                                                                                                                            |
|-------------------------------------------------------------------------------------------------------------------------------------------------------------|--------------------------------------------------------------------------------------------------------------------------------------------------------------------------------------------------------------------------------------------------------------------------------------------------------------------------------|------------------------------------------------------------------------------------------------------------------------------------------------------------------------------------------------------------------------------------------------------------------------------------------------------------------------------------------------------------------------------------------------------------------------------------------------------------------------------------------------------------------------------------------------------------------------------------------------------------------------------------------------------------------------------------------------------------------------------------------------------------------------------------------------------------------------------------------------------------------|
| Absent sleep transients (Spindles, K-complexes, Vertex waves)                                                                                               | <ul style="list-style-type: none"> <li>Unfavorable: Poor outcome <sup>21, 47</sup></li> <li>Decr. likelihood of a complete recovery <sup>34</sup></li> <li>Higher odds of death, longer LOS <sup>39</sup></li> </ul>                                                                                                           | <ul style="list-style-type: none"> <li>Absence of sleep architecture, both within 24h of cEEG hookup and at any time (any time: OR=4.3, 95%-CI 1.1-17.2); sensitive but not specific for poor outcome <sup>21, 47</sup></li> <li>Changes in SII sleep assoc. w. outcome (OR 2.59, p=.002) for complete recovery <sup>34</sup></li> <li>Loss of stage N2 is assoc. w. more severe encephalopathy, higher odds of death (w/o K-complexes, OR = 18.8 (p=.046); w/o spindles, OR=6.3 (p=.036)); longer LOS <sup>39</sup></li> </ul>                                                                                                                                                                                                                                                                                                                                  |
| Generalized / Diffuse Theta Slowing                                                                                                                         | <ul style="list-style-type: none"> <li>Benign (if persistent) <sup>11a</sup></li> <li>Unfavorable: Malignant (if persistent) <sup>11b</sup></li> <li>Poor prognosis <sup>41, 48</sup></li> </ul>                                                                                                                               | <ul style="list-style-type: none"> <li>a) Dominant diffuse theta (moderate amplitude, reactive); b) Theta pattern coma <sup>11</sup></li> <li>Mixed pattern (diffuse theta patterns mixed w. other frequencies like delta or alpha), ≤12% survival rate <sup>41</sup></li> <li>Theta/delta and delta assoc. w. more severe alteration of consciousness; Theta/delta assoc. w. poor outcome (OR=2.5, P=0.03) <sup>48</sup></li> </ul>                                                                                                                                                                                                                                                                                                                                                                                                                             |
| GRDA (Generalized Rhythmic Delta Activity)                                                                                                                  | <ul style="list-style-type: none"> <li>Benign (if persistent) <sup>11</sup></li> <li>Better / favorable outcome <sup>48, 49</sup></li> </ul>                                                                                                                                                                                   | <ul style="list-style-type: none"> <li>FRDA (reactive/non-reactive) <sup>11</sup></li> <li>Theta/delta and delta assoc. w. more severe alteration of consciousness; FIRDA assoc. w. good outcome (OR=4.8, p=0.004) <sup>48</sup>; FIRDA assoc. w. better outcome <sup>49</sup></li> </ul>                                                                                                                                                                                                                                                                                                                                                                                                                                                                                                                                                                        |
| LRDA (Lateralized Rhythmic Delta Activity)                                                                                                                  | <ul style="list-style-type: none"> <li>No diff. in mortality odds; higher odds of good functional outcome <sup>50</sup></li> <li>Unfavorable: Incr. risk of acute electrographic Sz <sup>50, 51</sup></li> </ul>                                                                                                               | <ul style="list-style-type: none"> <li>No diff. in mortality odds btw LRDA-only and control grps; LRDA-only had higher adj. odds of good functional outcome at clinic follow-up (OR 3.8, CI 1.0-13.2, p=0.04) compared to control grp; incr. risk of acute electrographic Sz <sup>50</sup></li> <li>LRDA in critically ill pts had a similar clinical significance as LPDs, LRDA was an indep. predictor of acute seizures <sup>51</sup></li> </ul>                                                                                                                                                                                                                                                                                                                                                                                                              |
| LPDs (Lateralized Periodic Discharges)                                                                                                                      | <ul style="list-style-type: none"> <li>Unfavorable: Malignant (if persistent) <sup>32</sup></li> <li>Poor functional outcome <sup>21, 22</sup></li> <li>Incr. mortality or severe disability at d/c <sup>24</sup></li> </ul>                                                                                                   | <ul style="list-style-type: none"> <li>PLEDs assoc. w. poor outcome (mRS 4-6); (OR=11.9; CI 2.9-49.2) <sup>21, 22</sup></li> <li>ESz or PEDs assoc. w. mortality or severe disability at d/c (adj. OR=19.1, P= 0.001) <sup>24</sup></li> <li>PEDs (including GPDs, PLEDs, BIPLEDs) persisting for &gt;24h assoc. w. poor outcome (OR=2.9, P=0.01) <sup>32</sup></li> </ul>                                                                                                                                                                                                                                                                                                                                                                                                                                                                                       |
| Low voltage: Moderate (<20µV)                                                                                                                               | <ul style="list-style-type: none"> <li>Unfavorable: Fatal (unless drug/hypothermia induced) <sup>11</sup></li> <li>Poor prognosis <sup>17, 19, 27, 52</sup></li> </ul>                                                                                                                                                         | <ul style="list-style-type: none"> <li>Low output EEG, &lt; 20µV <sup>11</sup></li> <li>Generalized suppression; less marked <sup>17, 19, 52</sup></li> <li>Generalized suppression, &lt;20µV <sup>27</sup></li> </ul>                                                                                                                                                                                                                                                                                                                                                                                                                                                                                                                                                                                                                                           |
| Generalized / Diffuse Delta Slowing                                                                                                                         | <ul style="list-style-type: none"> <li>Uncertain <sup>11a</sup></li> <li>Unfavorable: Malignant (if persistent) <sup>11b</sup></li> <li>Incr. mortality <sup>14, 42</sup></li> <li>ICU admit, incomplete recovery <sup>46</sup></li> <li>Poor outcome <sup>48</sup></li> </ul>                                                 | <ul style="list-style-type: none"> <li>a) Diffuse delta (reactive/non-react.); b) Low amplitude delta <sup>11</sup></li> <li>Slowing: Delta (OR = 2.4), suppression (OR = 4.5) assoc. w. incr. mortality <sup>14, 42</sup></li> <li>Gen delta slowing, including EDB, correlated w. ICU admit (OR=1.92, 95%-CI 1.20, 3.07; p=0.007) and incomplete recovery (OR=2.23, 95%-CI 1.09, 4.56; p=0.03) <sup>46</sup></li> <li>Theta/delta and delta assoc. w. more severe alteration of consciousness; Theta/delta assoc. w. poor outcome (OR=2.5, P=0.03) <sup>48</sup></li> </ul>                                                                                                                                                                                                                                                                                    |
| GPDs (Generalized Periodic Discharges) with or without triphasic morphology, or Triphasic Waves (TWs), or BIPDs (Bilateral Independent Periodic Discharges) | <ul style="list-style-type: none"> <li>No indep. assoc. w. worse outcomes <sup>48</sup></li> <li>Unfavorable: Poor prognosis <sup>12, 29, 32</sup></li> <li>Incr. mortality risk <sup>14, 24, 48</sup></li> <li>Incr. mortality / severe disability at d/c <sup>24, 53</sup></li> <li>Incr. LOS (ICU) <sup>29</sup></li> </ul> | <ul style="list-style-type: none"> <li>PEDs assoc. w. poor outcome (OR=7.6; CI 2.1-27.3) <sup>22</sup>; ESz or PEDs assoc. w. mortality or severe disability at d/c (adj. OR=19.1, P=0.001) <sup>24</sup>; PEDs (including GPDs, PLEDs, BIPLEDs) persisting for &gt;24h assoc. w. poor outcome (OR=2.9, P= 0.01) <sup>32</sup>; GPDs not indep. assoc. w. worse outcome (incr. mortality on univariate analysis, p=0.049, but not on multivariate), assoc. w. longer ICU stay (P = 0.002) <sup>29</sup></li> <li>TWs <sup>12</sup>, TWs assoc. w. mortality (OR=1.5) <sup>14</sup>; TWs assoc. w. more severe alteration of consciousness and w. higher mortality (OR = 4.5, P = 0.005) <sup>48</sup></li> <li>In multivariate analyses, BIPDs remained assoc. w. mortality (OR: 3.0 [1.4– 6.4]) &amp; poor outcome (OR: 2.9 [1.4–6.2]) <sup>53</sup></li> </ul> |
| Intermittent brief attenuation                                                                                                                              | <ul style="list-style-type: none"> <li>Unfavorable: Malignant <sup>11</sup></li> </ul>                                                                                                                                                                                                                                         | <ul style="list-style-type: none"> <li>Short, &lt;1s, episodes of bilateral suppression (w. low amp. diffuse irregular delta), intervals of bilateral suppression lasting several secs (w. theta pattern coma) <sup>11</sup></li> </ul>                                                                                                                                                                                                                                                                                                                                                                                                                                                                                                                                                                                                                          |

## VE-CAM-S: Supplemental Material

| EEG Feature                                               | Clinical outcomes                                                                                                                                                                                                                                                | Associated literature                                                                                                                                                                                                                                                                                                                                                                                                                                                                                                                                                                                                                                                                                                                                                                                                                                                                                                        |
|-----------------------------------------------------------|------------------------------------------------------------------------------------------------------------------------------------------------------------------------------------------------------------------------------------------------------------------|------------------------------------------------------------------------------------------------------------------------------------------------------------------------------------------------------------------------------------------------------------------------------------------------------------------------------------------------------------------------------------------------------------------------------------------------------------------------------------------------------------------------------------------------------------------------------------------------------------------------------------------------------------------------------------------------------------------------------------------------------------------------------------------------------------------------------------------------------------------------------------------------------------------------------|
| EDB (Extreme Delta Brush)                                 | <ul style="list-style-type: none"> <li>• Unfavorable: Higher likelihood of ICU admit or poorer outcome <sup>46</sup>, prolonged hospitalization <sup>54</sup></li> </ul>                                                                                         | <ul style="list-style-type: none"> <li>• Gen delta slowing, including EDB, correl. w. ICU admission (OR = 1.92, 95%-CI 1.20, 3.07; p=0.007) and incomplete recovery (OR=2.23, 95%-CI 1.09, 4.56; p=0.03) <sup>46</sup></li> <li>• EDB assoc. w. more prolonged hospitalization (p=.008) <sup>54</sup></li> </ul>                                                                                                                                                                                                                                                                                                                                                                                                                                                                                                                                                                                                             |
| NCSE (Nonconvulsive Status Epilepticus): Generalized      | <ul style="list-style-type: none"> <li>• No assoc. w. survival, disability at d/c <sup>35</sup></li> <li>• Unfavorable: Poor outcome <sup>16, 18, 29, 32, 43</sup><br/>Incr. mortality<sup>18</sup> or severe disability at d/c <sup>16, 32, 43</sup></li> </ul> | <ul style="list-style-type: none"> <li>• NCSE assoc. w. incr. mortality, risk for poor neurologic outcome <sup>16, 43</sup></li> <li>• Gen. patterns of NCSE is assoc. w. death (p=0.017) <sup>18</sup></li> <li>• NCSE indep. assoc. w. worse outcome <sup>29</sup></li> <li>• NCSz (including NCSE) assoc. w. poor outcome: death &amp; severe disability at d/c (OR = 10.4, P = 0.039) <sup>32</sup></li> <li>• NCS wasn't assoc. w. outcome (survival/disability) at hosp. d/c or 1yr <sup>35</sup></li> </ul>                                                                                                                                                                                                                                                                                                                                                                                                           |
| Low voltage: Extreme / ECS (Electrocerebral Silence)      | <ul style="list-style-type: none"> <li>• Unfavorable: Poor prognosis, Fatal (unless drug / hypothermia induced) <sup>11, 37, 55</sup></li> </ul>                                                                                                                 | <ul style="list-style-type: none"> <li>• Low output EEG, Isoelectric (or near isoelectric) <sup>11</sup></li> <li>• Isoelectric <sup>37, 55</sup></li> </ul>                                                                                                                                                                                                                                                                                                                                                                                                                                                                                                                                                                                                                                                                                                                                                                 |
| Burst suppression (with or without epileptiform activity) | <ul style="list-style-type: none"> <li>• Unfavorable: Malignant (if persistent) <sup>11</sup><br/>Poor prognosis <sup>10, 17, 23, 52</sup><br/>Incr. LOS (post-ICU hosp., total hosp.),<br/>Higher 6-mo mortality <sup>23</sup></li> </ul>                       | <ul style="list-style-type: none"> <li>• Burst suppression <sup>10, 11, 17, 52</sup></li> <li>• Longer post-ICU (HR=1.84, p=0.03), longer total LOS (HR=1.70, p=0.06); higher 6-mo mortality (HR=2.04, P=0.02) <sup>23</sup></li> <li>• Burst suppression w. generalized epileptiform act. <sup>27</sup></li> </ul>                                                                                                                                                                                                                                                                                                                                                                                                                                                                                                                                                                                                          |
| Unreactive EEG                                            | <ul style="list-style-type: none"> <li>• Uncertain <sup>11, 28</sup></li> <li>• Unfavorable: Poor outcome <sup>28, 32, 36, 37</sup><br/>Incr. mortality <sup>35, 36, 37, 38, 48, 56</sup></li> </ul>                                                             | <ul style="list-style-type: none"> <li>• Non-reactive <sup>11</sup></li> <li>• Absence of reactivity is not invariably assoc. w. a poor prognosis <sup>28</sup></li> <li>• No reactivity tended to be assoc. w. poor outcome (OR=2.8, P=0.13) but wasn't sig. <sup>32</sup></li> <li>• Absence of reactivity assoc. w. mortality up to 1-yr post-d/c (p=0.002) <sup>35</sup></li> <li>• Absence of reactivity assoc. w. unfavorable outcome; ICU mortality indep. assoc. (OR=4.44) <sup>36, 37</sup></li> <li>• Absence of background reactivity is assoc. w. incr. mortality (p&lt;0.0001) <sup>38</sup></li> <li>• Absent reactivity was indep. assoc. w. death (OR 3.73, 95%CI 1.08-12.80, p=0.037)<sup>48</sup></li> <li>• Unreactive background was incompatible w. good long-term neuro recovery (CPC 1-2), strongly assoc. w. in-hosp. mortality (adj. OR for death, 15.4; 95%-CI, 3.3-71.9) <sup>56</sup></li> </ul> |

## Supplemental references

1. BICKFORD RG, BUTT HR. Hepatic coma: the electroencephalographic pattern. *J Clin Invest.* 1955;34(6):790-799. doi:10.1172/JCI103134
2. PARSONS-SMITH BG, SUMMERSKILL WH, DAWSON AM, SHERLOCK S. The electroencephalograph in liver disease. *Lancet.* 1957;273(7001):867-871. doi:10.1016/s0140-6736(57)90005-3
3. SILVERMAN D. Some observations on the EEG in hepatic coma. *Electroencephalogr Clin Neurophysiol.* 1962;14:53-59. doi:10.1016/0013-4694(62)90006-8
4. HOCKADAY JM, POTTS F, EPSTEIN E, BONAZZI A, SCHWAB RS. ELECTROENCEPHALOGRAPHIC CHANGES IN ACUTE CEREBRAL ANOXIA FROM CARDIAC OR RESPIRATORY ARREST. *Electroencephalogr Clin Neurophysiol.* 1965;18:575-586. doi:10.1016/0013-4694(65)90075-1
5. Bergamasco B, Bergamini L, Doriguzzi T, Fabiani D. EEG sleep patterns as a prognostic criterion in post-traumatic coma. *Electroencephalogr Clin Neurophysiol.* 1968;24(4):374-377. doi:10.1016/0013-4694(68)90198-3
6. Binnie CD, Prior PF, Lloyd DS, Scott DF, Margerison JH. Electroencephalographic prediction of fatal anoxic brain damage after resuscitation from cardiac arrest. *Br Med J.* 1970;4(5730):265-268. doi:10.1136/bmj.4.5730.265
7. Hughes JR, Boshes B, Leestma J. Electro-Clinical and Pathologic Correlations in Comatose Patients. *Clinical Electroencephalography.* 1976;7(1):13-30. doi:10.1177/155005947600700102
8. Karnaze DS, Bickford RG. Triphasic waves: a reassessment of their significance. *Electroencephalogr Clin Neurophysiol.* 1984;57(3):193-198. doi:10.1016/0013-4694(84)90120-2
9. Sundaram MB, Blume WT. Triphasic waves: clinical correlates and morphology. *Can J Neurol Sci.* 1987;14(2):136-140. doi:10.1017/s0317167100026251
10. Scollo-Lavizzari G, Bassetti C. Prognostic value of EEG in post-anoxic coma after cardiac arrest. *Eur Neurol.* 1987;26(3):161-170. doi:10.1159/000116329
11. Synek VM. EEG abnormality grades and subdivisions of prognostic importance in traumatic and anoxic coma in adults. *Clin Electroencephalogr.* 1988;19(3):160-166. doi:10.1177/155005948801900310
12. Bahamon-Dussan JE, Celesia GG, Grigg-Damberger MM. Prognostic significance of EEG triphasic waves in patients with altered state of consciousness. *J Clin Neurophysiol.* 1989;6(4):313-319. doi:10.1097/00004691-198910000-00002
13. Rae-Grant AD, Barbour PJ, Reed J. Development of a novel EEG rating scale for head injury using dichotomous variables. *Electroencephalogr Clin Neurophysiol.* 1991;79(5):349-357. doi:10.1016/0013-4694(91)90199-e
14. Young GB, Bolton CF, Archibald YM, Austin TW, Wells GA. The electroencephalogram in sepsis-associated encephalopathy. *J Clin Neurophysiol.* 1992;9(1):145-152. doi:10.1097/00004691-199201000-00016
15. Yamashita S, Morinaga T, Ohgo S, et al. Prognostic value of electroencephalogram (EEG) in anoxic encephalopathy after cardiopulmonary resuscitation: relationship among anoxic period, EEG grading and outcome. *Intern Med.* 1995;34(2):71-76. doi:10.2169/internalmedicine.34.71
16. Young GB, Jordan KG, Doig GS. An assessment of nonconvulsive seizures in the intensive care unit using continuous EEG monitoring: an investigation of variables associated with mortality. *Neurology.* 1996;47(1):83-89. doi:10.1212/wnl.47.1.83
17. Young GB, McLachlan RS, Kreeft JH, Demelo JD. An electroencephalographic classification for coma. *Can J Neurol Sci.* 1997;24(4):320-325. doi:10.1017/s0317167100032996
18. Litt B, Wityk RJ, Hertz SH, et al. Nonconvulsive status epilepticus in the critically ill elderly. *Epilepsia.* 1998;39(11):1194-1202. doi:10.1111/j.1528-1157.1998.tb01311.x
19. Young GB, Kreeft JH, McLachlan RS, Demelo J. EEG and clinical associations with mortality in comatose patients in a general intensive care unit. *J Clin Neurophysiol.* 1999;16(4):354-360. doi:10.1097/00004691-199907000-00008
20. Amodio P, Marchetti P, Del Piccolo F, et al. Spectral versus visual EEG analysis in mild hepatic encephalopathy. *Clin Neurophysiol.* 1999;110(8):1334-1344. doi:10.1016/s1388-2457(99)00076-0
21. Claassen J, Hirsch LJ, Frontera JA, et al. Prognostic significance of continuous EEG monitoring in patients with poor-grade subarachnoid hemorrhage. *Neurocrit Care.* 2006;4(2):103-112. doi:10.1385/NCC:4:2:103
22. Claassen J, Jetté N, Chum F, et al. Electrographic seizures and periodic discharges after intracerebral hemorrhage. *Neurology.* 2007;69(13):1356-1365. doi:10.1212/01.wnl.0000281664.02615.6c
23. Watson PL, Shintani AK, Tyson R, Pandharipande PP, Pun BT, Ely EW. Presence of electroencephalogram burst suppression in sedated, critically ill patients is associated with increased mortality. *Crit Care Med.* 2008;36(12):3171-3177. doi:10.1097/CCM.0b013e318186b9ce
24. Oddo M, Carrera E, Claassen J, Mayer SA, Hirsch LJ. Continuous electroencephalography in the medical intensive care unit. *Crit Care Med.* 2009;37(6):2051-2056. doi:10.1097/CCM.0b013e3181a00604
25. Roest A, van Bets B, Jorens PG, Baar I, Weyler J, Mercelis R. The prognostic value of the EEG in postanoxic coma. *Neurocrit Care.* 2009;10(3):318-325. doi:10.1007/s12028-008-9178-4
26. Bagnato S, Boccagni C, Prestandrea C, Sant'Angelo A, Castiglione A, Galardi G. Prognostic value of standard EEG in traumatic and non-traumatic disorders of consciousness following coma. *Clin Neurophysiol.* 2010;121(3):274-280. doi:10.1016/j.clinph.2009.11.008
27. Boccagni C, Bagnato S, Sant'Angelo A, Prestandrea C, Galardi G. Usefulness of standard EEG in predicting the outcome of patients with disorders of consciousness after anoxic coma. *J Clin Neurophysiol.* 2011;28(5):489-492. doi:10.1097/WNP.0b013e318231c8c8

## VE-CAM-S: Supplemental Material

28. Logi F, Pasqualetti P, Tomaiuolo F. Predict recovery of consciousness in post-acute severe brain injury: the role of EEG reactivity. *Brain Inj.* 2011;25(10):972-979. doi:10.3109/02699052.2011.589795
29. Foreman B, Claassen J, Abou Khaled K, et al. Generalized periodic discharges in the critically ill: a case-control study of 200 patients. *Neurology.* 2012;79(19):1951-1960. doi:10.1212/WNL.0b013e3182735cd7
30. Kamel H, Betjemann JP, Navi BB, et al. Diagnostic yield of electroencephalography in the medical and surgical intensive care unit. *Neurocrit Care.* 2013;19(3):336-341. doi:10.1007/s12028-012-9736-7
31. Polito A, Eischwald F, Maho AL, et al. Pattern of brain injury in the acute setting of human septic shock. *Crit Care.* 2013;17(5):R204. Published 2013 Sep 18. doi:10.1186/cc12899
32. Kurtz P, Gaspard N, Wahl AS, et al. Continuous electroencephalography in a surgical intensive care unit. *Intensive Care Med.* 2014;40(2):228-234. doi:10.1007/s00134-013-3149-8
33. Rossi Sebastiano D, Panzica F, Visani E, et al. Significance of multiple neurophysiological measures in patients with chronic disorders of consciousness. *Clin Neurophysiol.* 2015;126(3):558-564. doi:10.1016/j.clinph.2014.07.004
34. Alvarez V, Drislane FW, Westover MB, Dworetzky BA, Lee JW. Characteristics and role in outcome prediction of continuous EEG after status epilepticus: A prospective observational cohort. *Epilepsia.* 2015;56(6):933-941. doi:10.1111/epi.12996
35. Gilmore EJ, Gaspard N, Choi HA, et al. Acute brain failure in severe sepsis: a prospective study in the medical intensive care unit utilizing continuous EEG monitoring. *Intensive Care Med.* 2015;41(4):686-694. doi:10.1007/s00134-015-3709-1
36. Azabou E, Magalhaes E, Braconnier A, et al. Early Standard Electroencephalogram Abnormalities Predict Mortality in Septic Intensive Care Unit Patients. *PLoS One.* 2015;10(10):e0139969. Published 2015 Oct 8. doi:10.1371/journal.pone.0139969
37. Azabou E, Fischer C, Manguiere F, et al. Prospective Cohort Study Evaluating the Prognostic Value of Simple EEG Parameters in Postanoxic Coma. *Clin EEG Neurosci.* 2016;47(1):75-82. doi:10.1177/1550059415612375
38. Sutter R, Kaplan PW. Clinical, Electroencephalographic, and Neuroradiological Outcome Predictors in Acute Nonhypoxic Encephalopathy: A Nine-Year Cohort Study. *Clin EEG Neurosci.* 2016;47(1):61-68. doi:10.1177/1550059415579768
39. Knauert MP, Gilmore EJ, Murphy TE, et al. Association between death and loss of stage N2 sleep features among critically ill patients with delirium. *J Crit Care.* 2018;48:124-129. doi:10.1016/j.jcrc.2018.08.028
40. Nielsen RM, Urdanibia-Centelles O, Vedel-Larsen E, et al. Continuous EEG Monitoring in a Consecutive Patient Cohort with Sepsis and Delirium. *Neurocrit Care.* 2020;32(1):121-130. doi:10.1007/s12028-019-00703-w
41. Kaplan PW. The EEG in metabolic encephalopathy and coma. *J Clin Neurophysiol.* 2004;21(5):307-318.
42. Hosokawa K, Gaspard N, Su F, Oddo M, Vincent JL, Taccone FS. Clinical neurophysiological assessment of sepsis-associated brain dysfunction: a systematic review. *Crit Care.* 2014;18(6):674. Published 2014 Dec 8. doi:10.1186/s13054-014-0674-y
43. Herman ST, Abend NS, Bleck TP, et al. Consensus statement on continuous EEG in critically ill adults and children, part I: indications. *J Clin Neurophysiol.* 2015;32(2):87-95. doi:10.1097/WNP.0000000000000166
44. Sutter R, Kaplan PW, Valença M, De Marchis GM. EEG for Diagnosis and Prognosis of Acute Nonhypoxic Encephalopathy: History and Current Evidence. *J Clin Neurophysiol.* 2015;32(6):456-464. doi:10.1097/WNP.0000000000000164
45. Palanca BJA, Wildes TS, Ju YS, Ching S, Avidan MS. Electroencephalography and delirium in the postoperative period. *Br J Anaesth.* 2017;119(2):294-307. doi:10.1093/bja/aew475
46. Gillinder L, Warren N, Hartel G, Dionisio S, O'Gorman C. EEG findings in NMDA encephalitis - A systematic review. *Seizure.* 2019;65:20-24. doi:10.1016/j.seizure.2018.12.015
47. Lee H, Mizrahi MA, Hartings JA, et al. Continuous Electroencephalography After Moderate to Severe Traumatic Brain Injury. *Crit Care Med.* 2019;47(4):574-582. doi:10.1097/CCM.00000000000003639
48. Sutter R, Stevens RD, Kaplan PW. Significance of triphasic waves in patients with acute encephalopathy: a nine-year cohort study. *Clin Neurophysiol.* 2013;124(10):1952-1958. doi:10.1016/j.clinph.2013.03.031
49. Sutter R, Stevens RD, Kaplan PW. Clinical and imaging correlates of EEG patterns in hospitalized patients with encephalopathy. *J Neurol.* 2013;260(4):1087-1098. doi:10.1007/s00415-012-6766-1
50. Husari KS, Johnson EL, Ritzl EK. Acute and Long-Term Outcomes of Lateralized Rhythmic Delta Activity (LRDA) Versus Lateralized Periodic Discharges (LPDs) in Critically Ill Patients. *Neurocrit Care.* 2021;34(1):201-208. doi:10.1007/s12028-020-01017-y
51. Gaspard N, Manganas L, Rampal N, Petroff OA, Hirsch LJ. Similarity of lateralized rhythmic delta activity to periodic lateralized epileptiform discharges in critically ill patients. *JAMA Neurol.* 2013;70(10):1288-1295. doi:10.1001/jamaneurol.2013.3475
52. Young GB. The EEG in coma. *J Clin Neurophysiol.* 2000;17(5):473-485. doi:10.1097/00004691-200009000-00006
53. Osman G, Rahangdale R, Britton JW, et al. Bilateral independent periodic discharges are associated with electrographic seizures and poor outcome: A case-control study. *Clin Neurophysiol.* 2018;129(11):2284-2289. doi:10.1016/j.clinph.2018.07.025
54. Schmitt SE, Pargeon K, Frechette ES, Hirsch LJ, Dalmau J, Friedman D. Extreme delta brush: a unique EEG pattern in adults with anti-NMDA receptor encephalitis. *Neurology.* 2012;79(11):1094-1100. doi:10.1212/WNL.0b013e3182698cd8
55. Silverman D, Saunders MG, Schwab RS, Masland RL. Cerebral death and the electroencephalogram. Report of the ad hoc committee of the American Electroencephalographic Society on EEG Criteria for determination of cerebral death. *JAMA.* 1969;209(10):1505-1510. doi:10.1001/jama.209.10.1505
56. Rossetti AO, Oddo M, Logroscino G, Kaplan PW. Prognostication after cardiac arrest and hypothermia: a prospective study. *Ann Neurol.* 2010;67(3):301-307. doi:10.1002/ana.21984
57. Zhang B, Srihari SN. Properties of binary vector dissimilarity measures. In *Proc. JCIS Int'l Conf. Computer Vision, Pattern Recognition, and Image Processing 2003; Vol. 1.*



**eFigure 1:** Flow diagram of subject enrollment

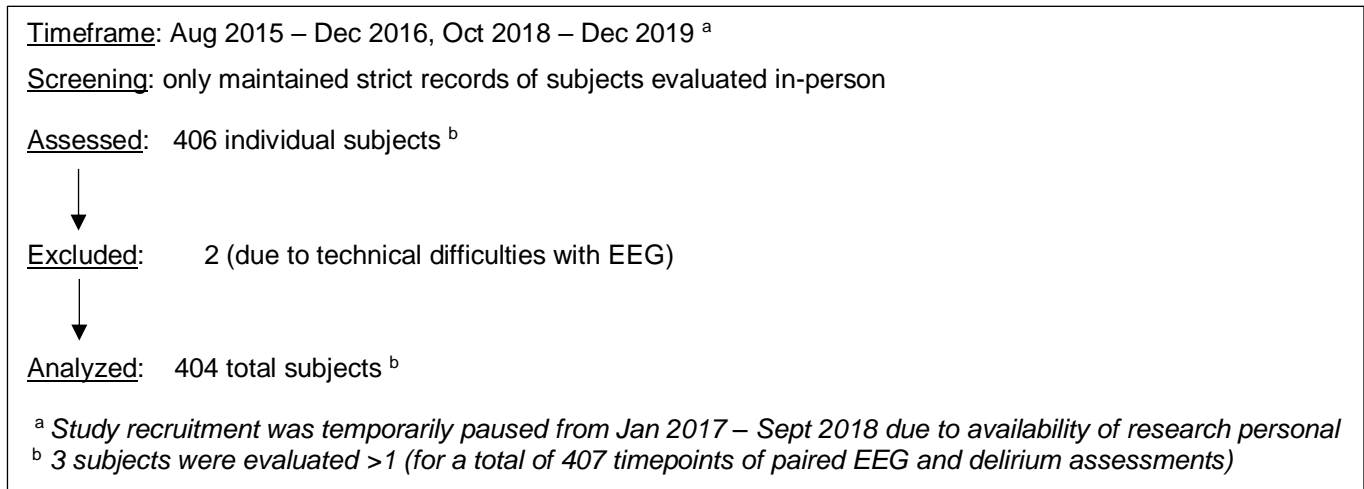

**eFigure 2:** Machine learning steps for model development

**Outer CV**

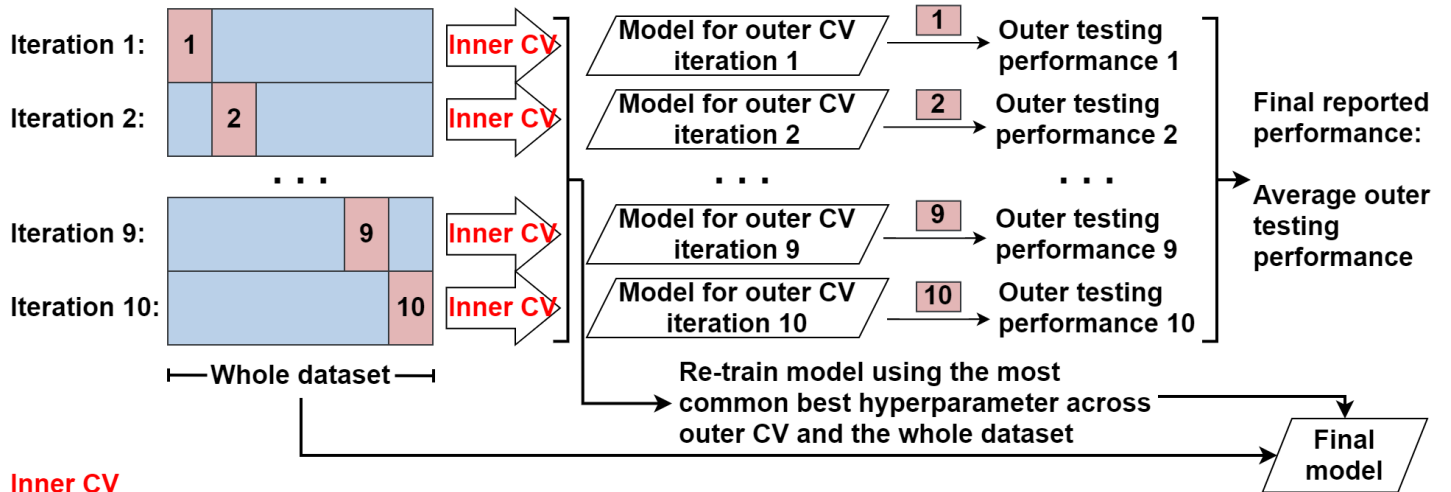

**Inner CV**

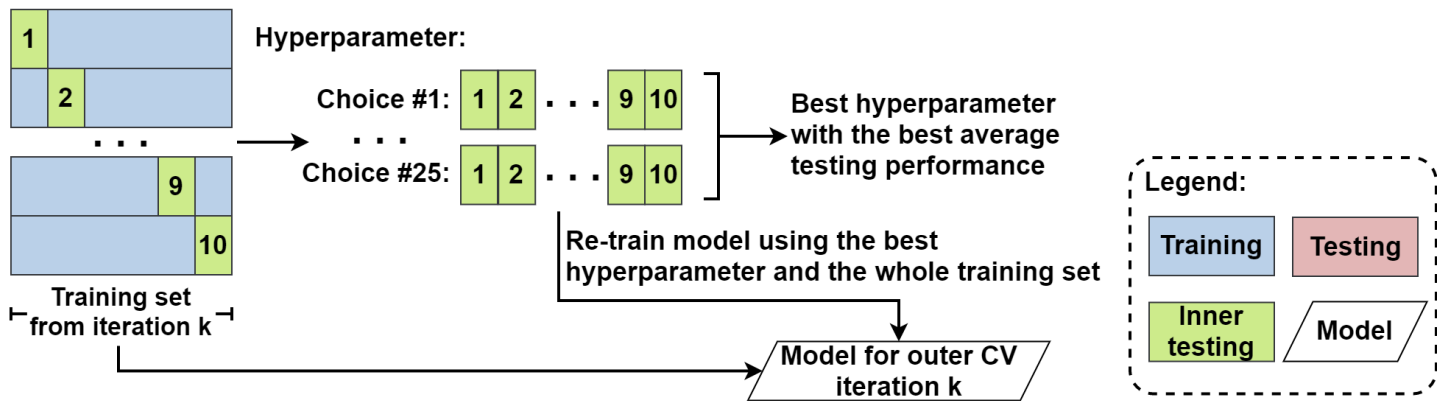

**eFigure 3:** Correlation among the EEG features

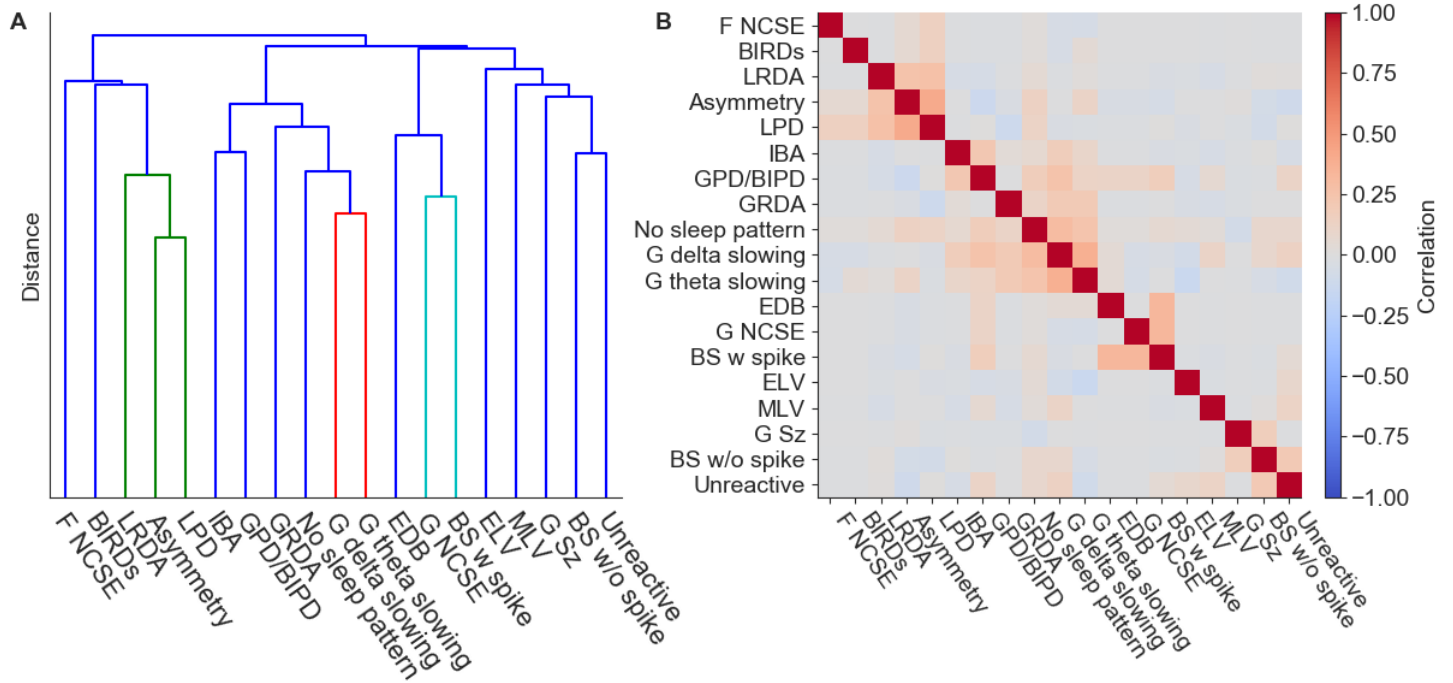

(A) The hierarchical clustering of features based on the correlation of each pair of features. We show the features used to fit the model, which include those that enter the final model in addition to a few held out for being too infrequent in the dataset. Correlation between binary features is defined according to the "Correlation" method in Table 1 of Zhang et al.<sup>57</sup> Lower distances represent higher correlation. (B) The correlation matrix among EEG features. High correlation (red) means more similar binary patterns; and vice versa (blue).

eFigures 4 – 58: EEG examples of normal, low, mid, high, and worst VE-CAM-S scores

eFigure 4: Example EEG signal for 'Normal case'

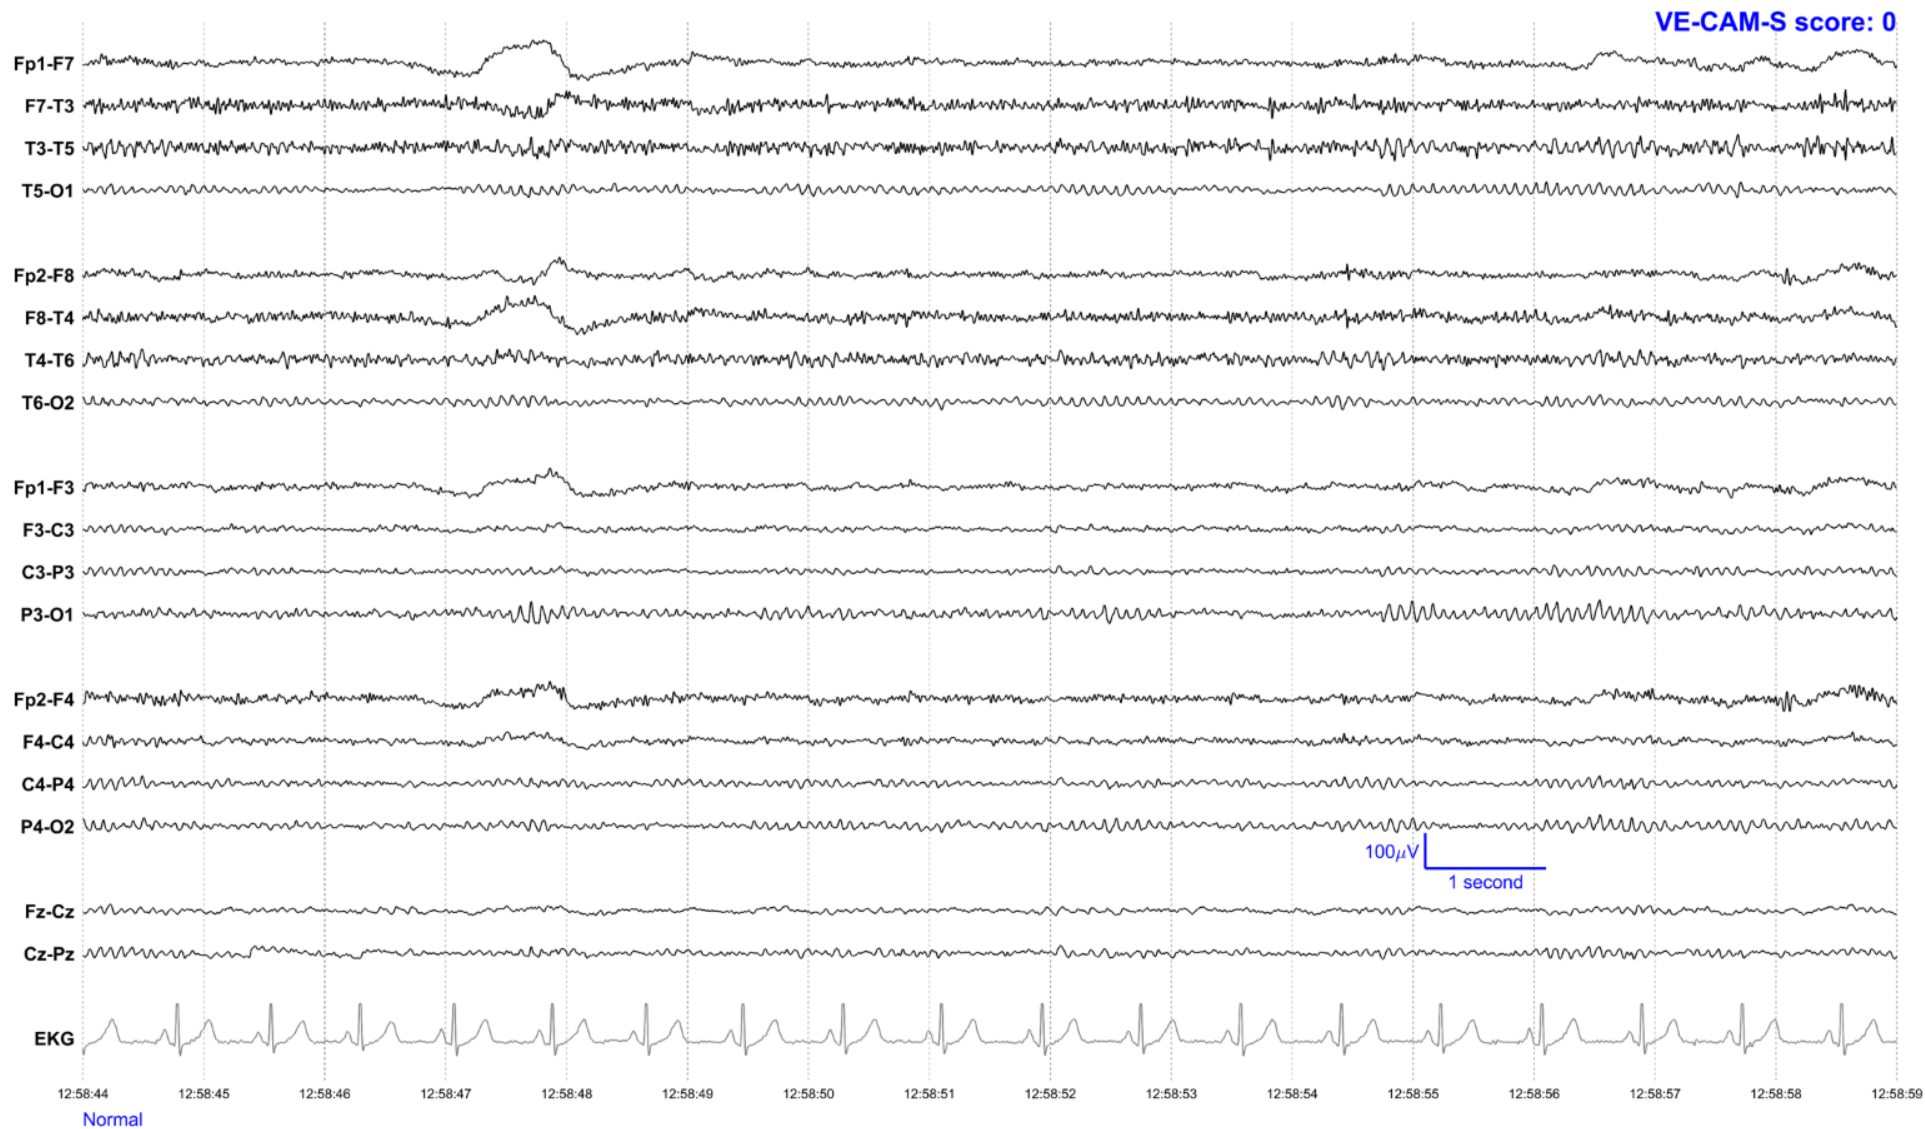

eFigure 5: Example EEG signal for 'Normal case'

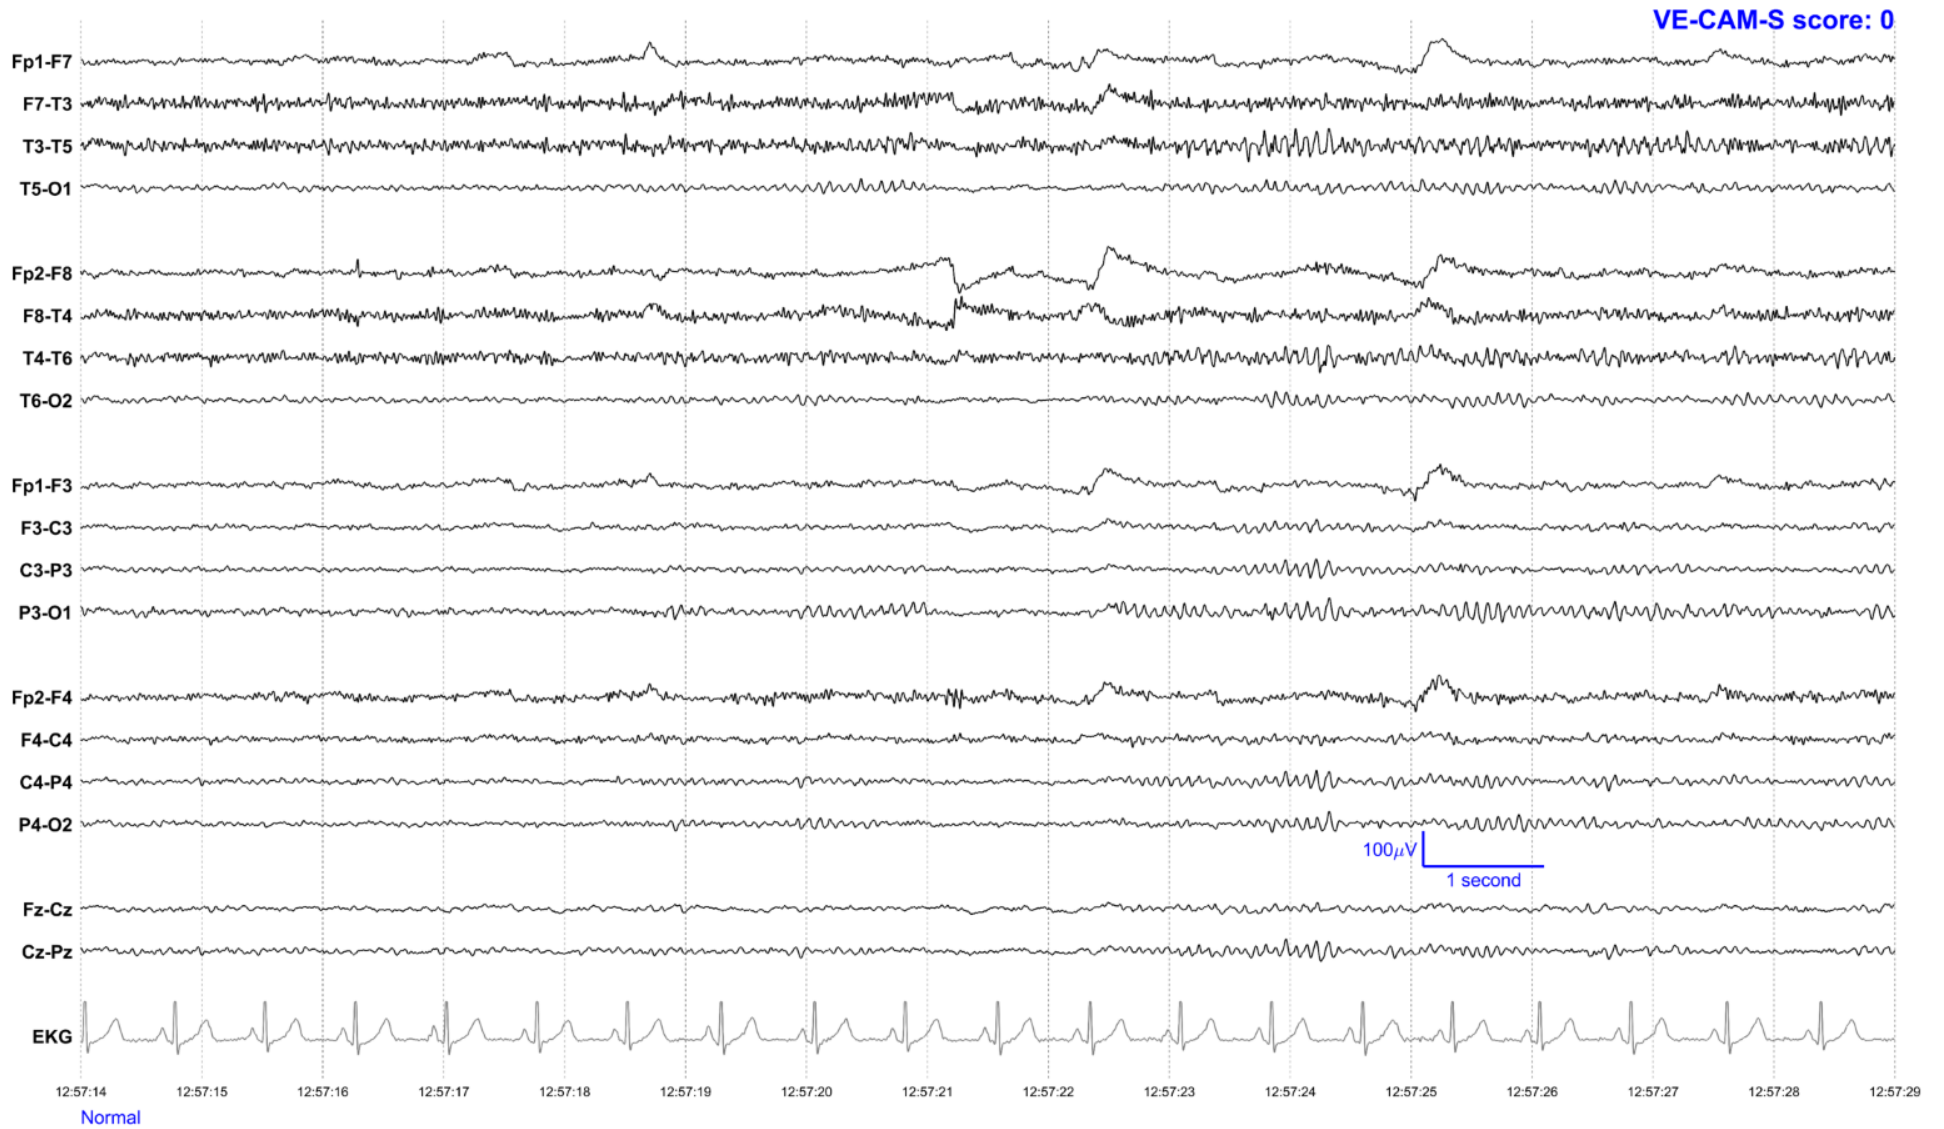

eFigure 6: Example EEG signal for 'Low delirium severity'

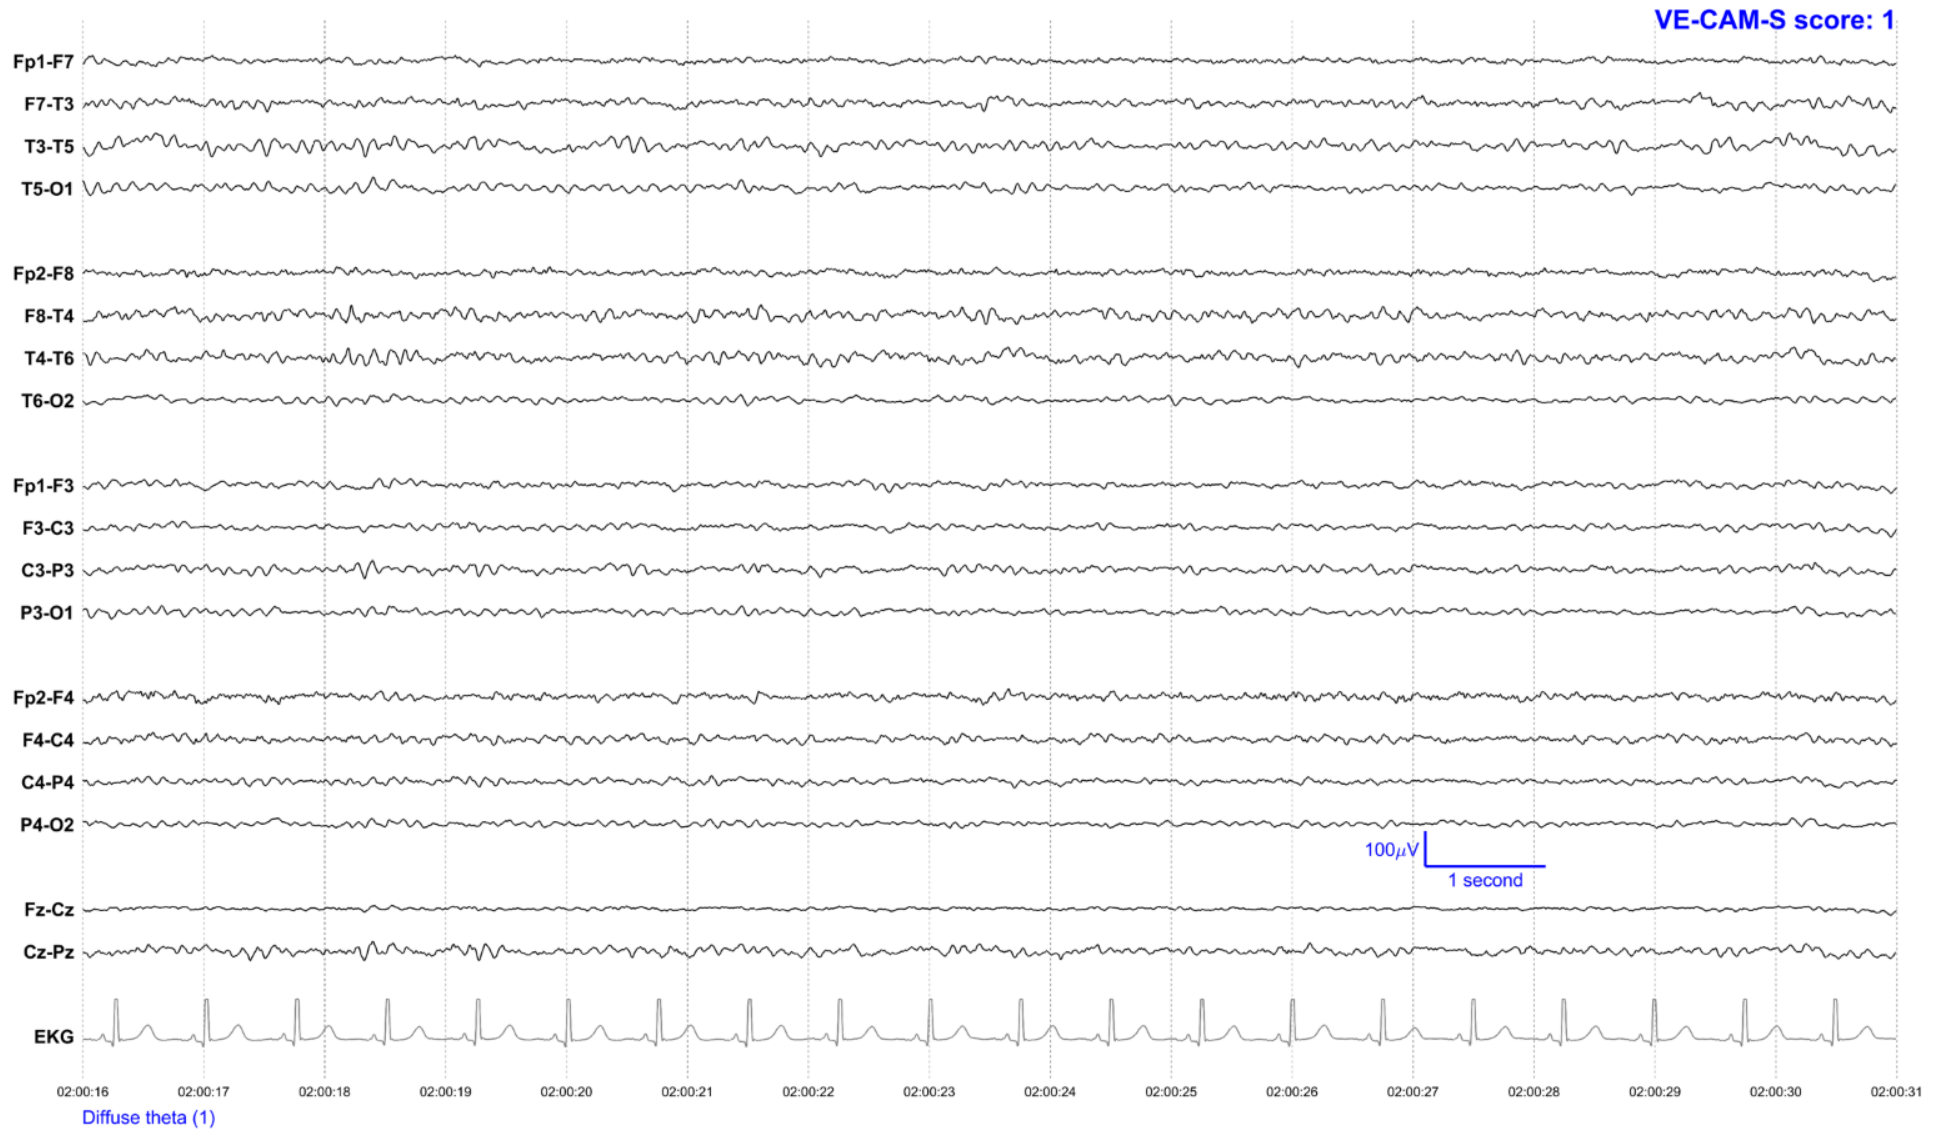

eFigure 7: Example EEG signal for 'Low delirium severity'

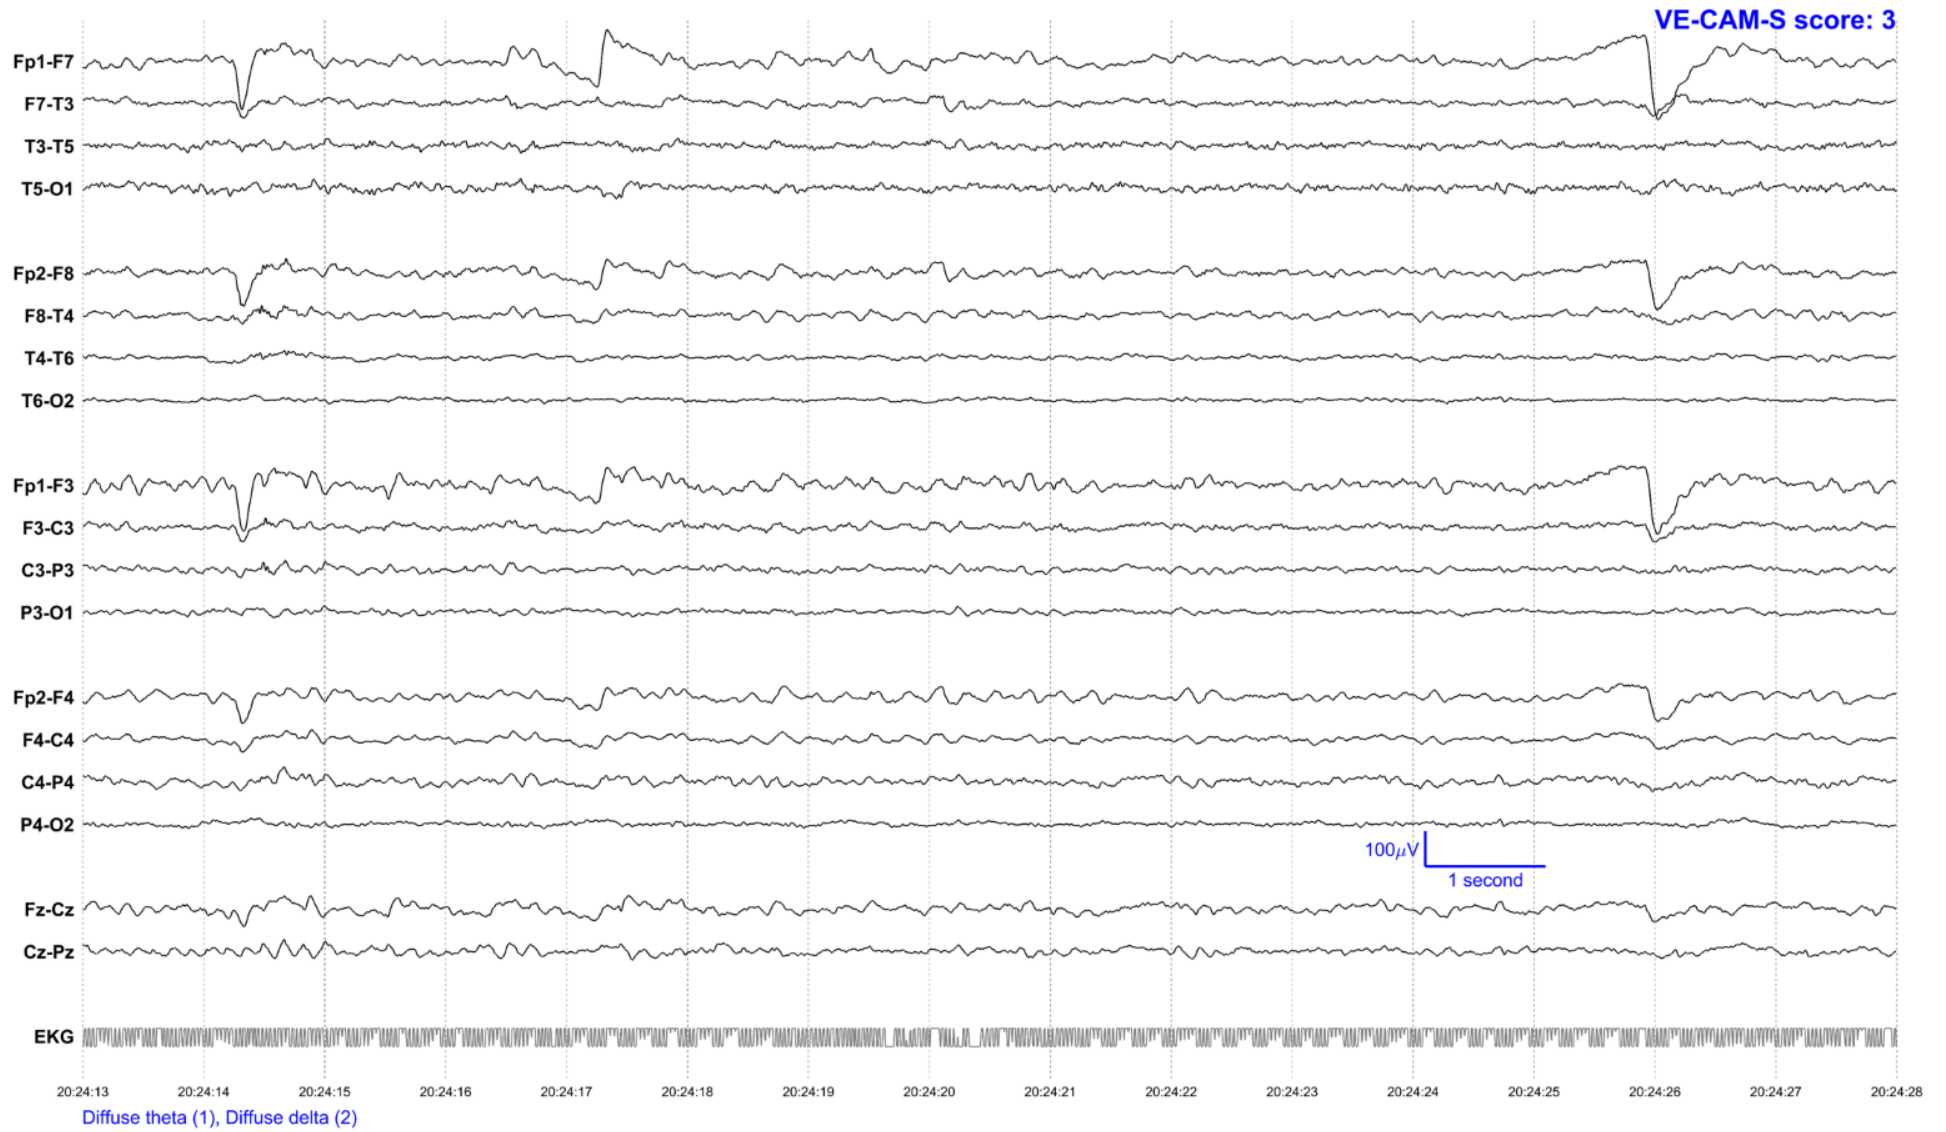

eFigure 8: Example EEG signal for 'Low delirium severity'

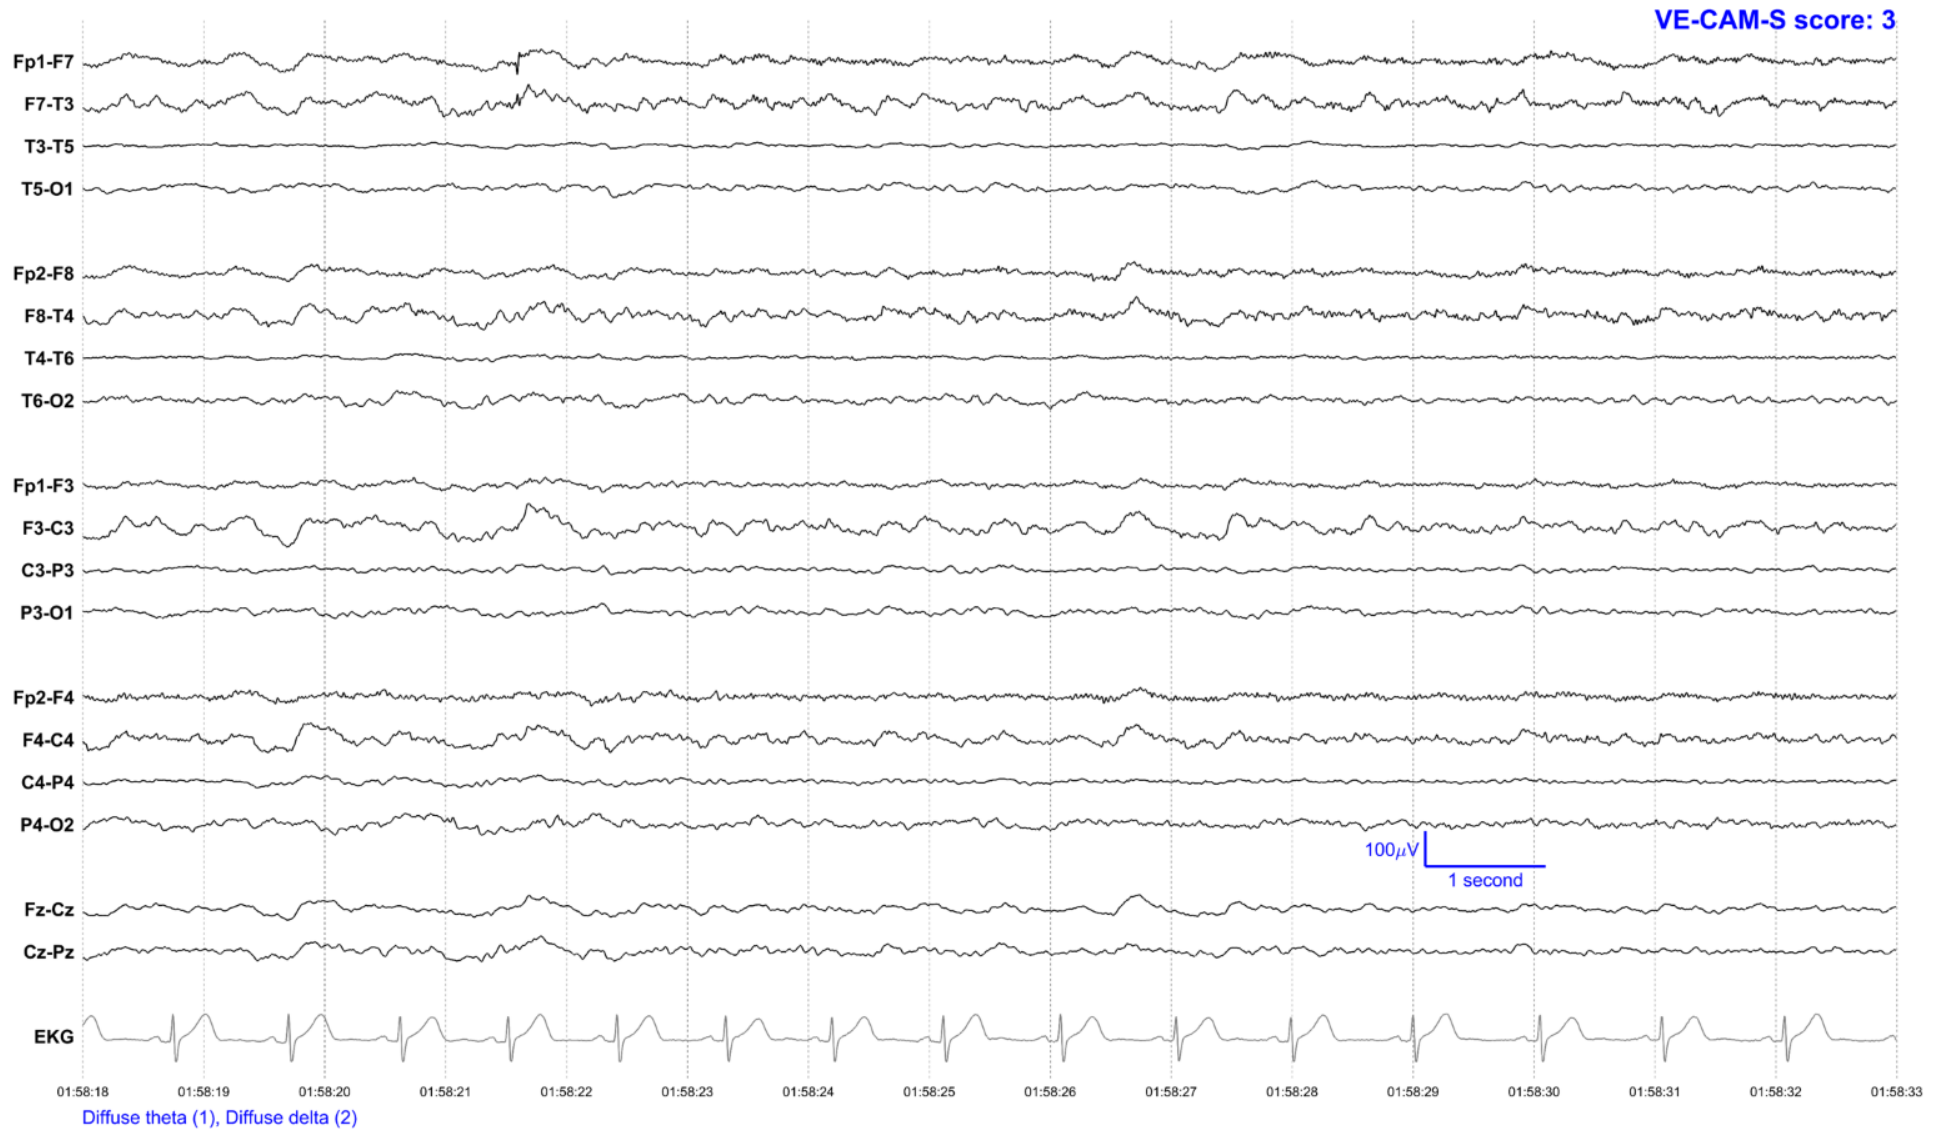



eFigure 9: Example EEG signal for 'Low delirium severity'

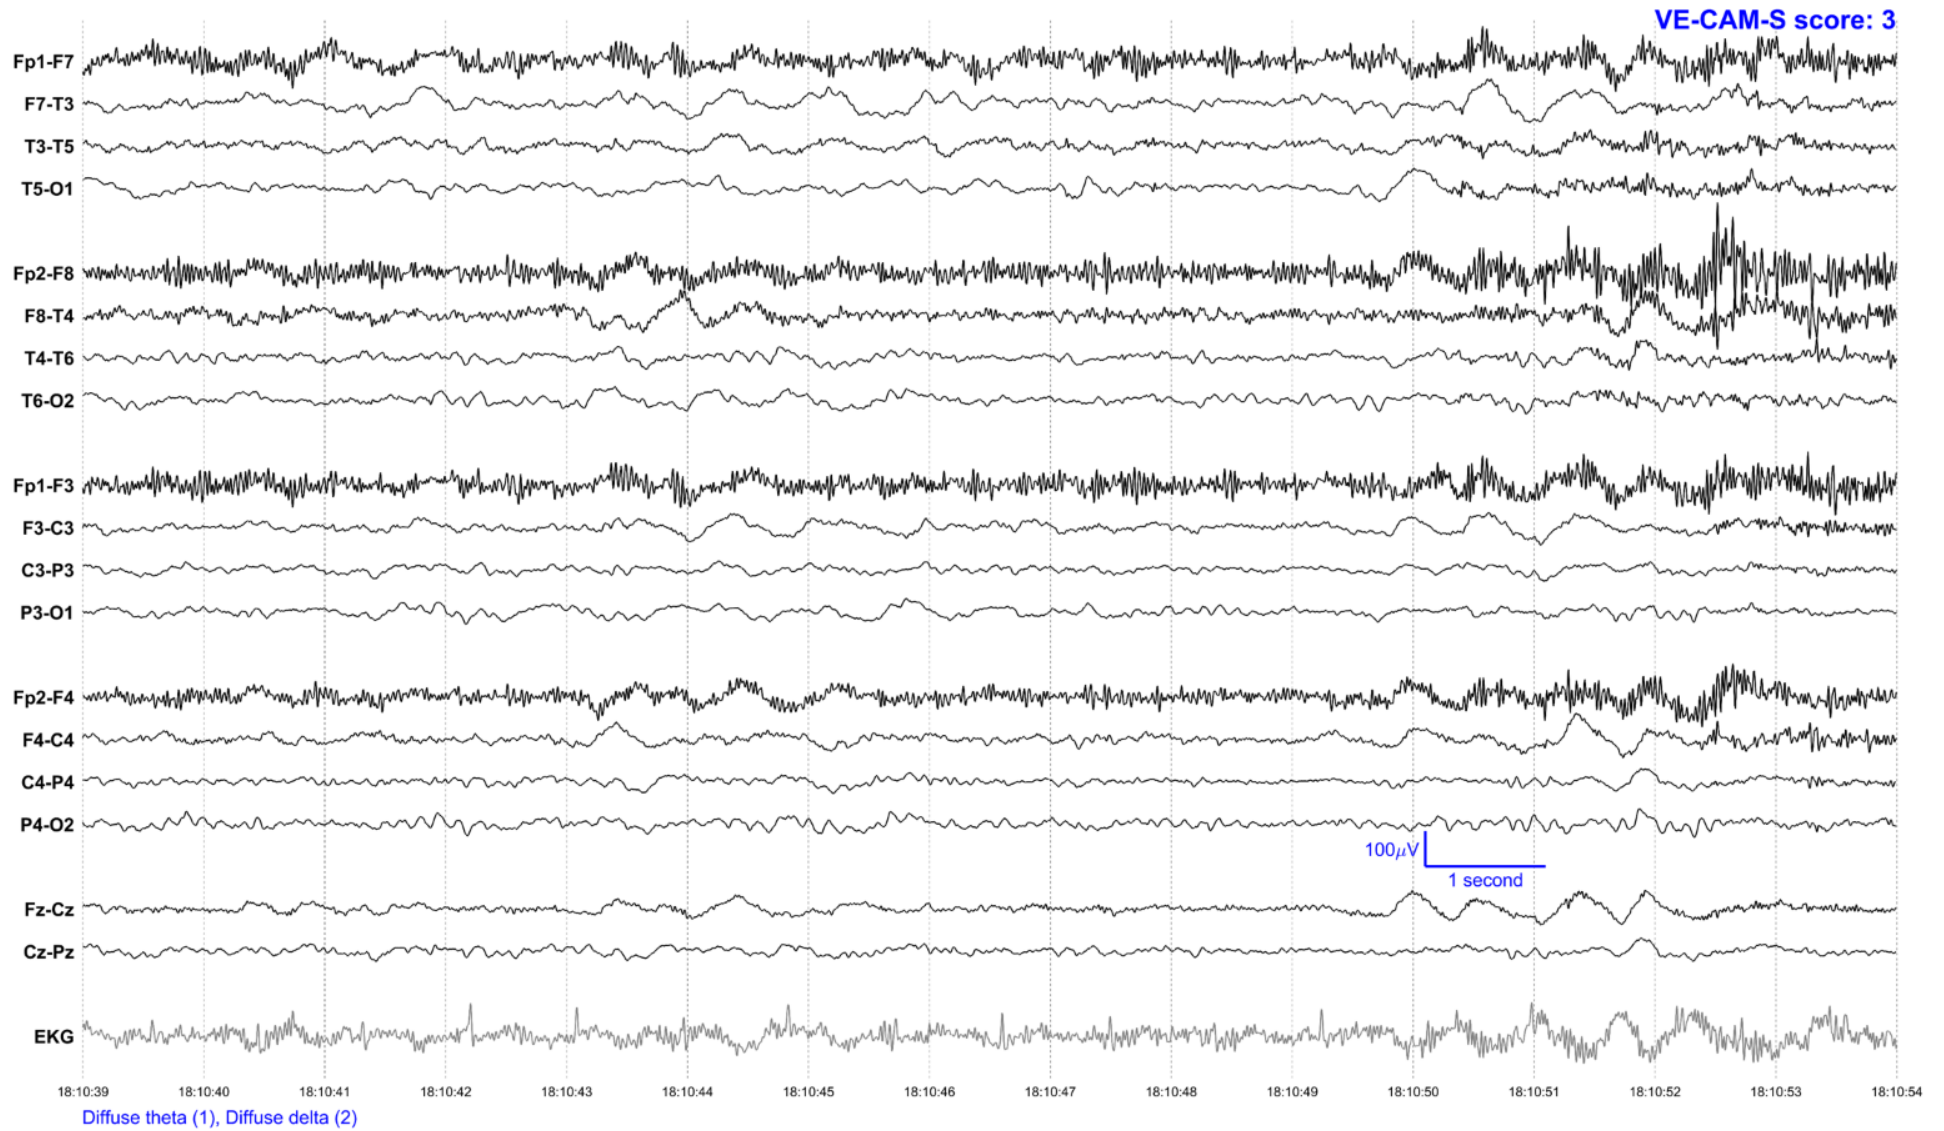

eFigure 10: Example EEG signal for 'Moderate delirium severity'

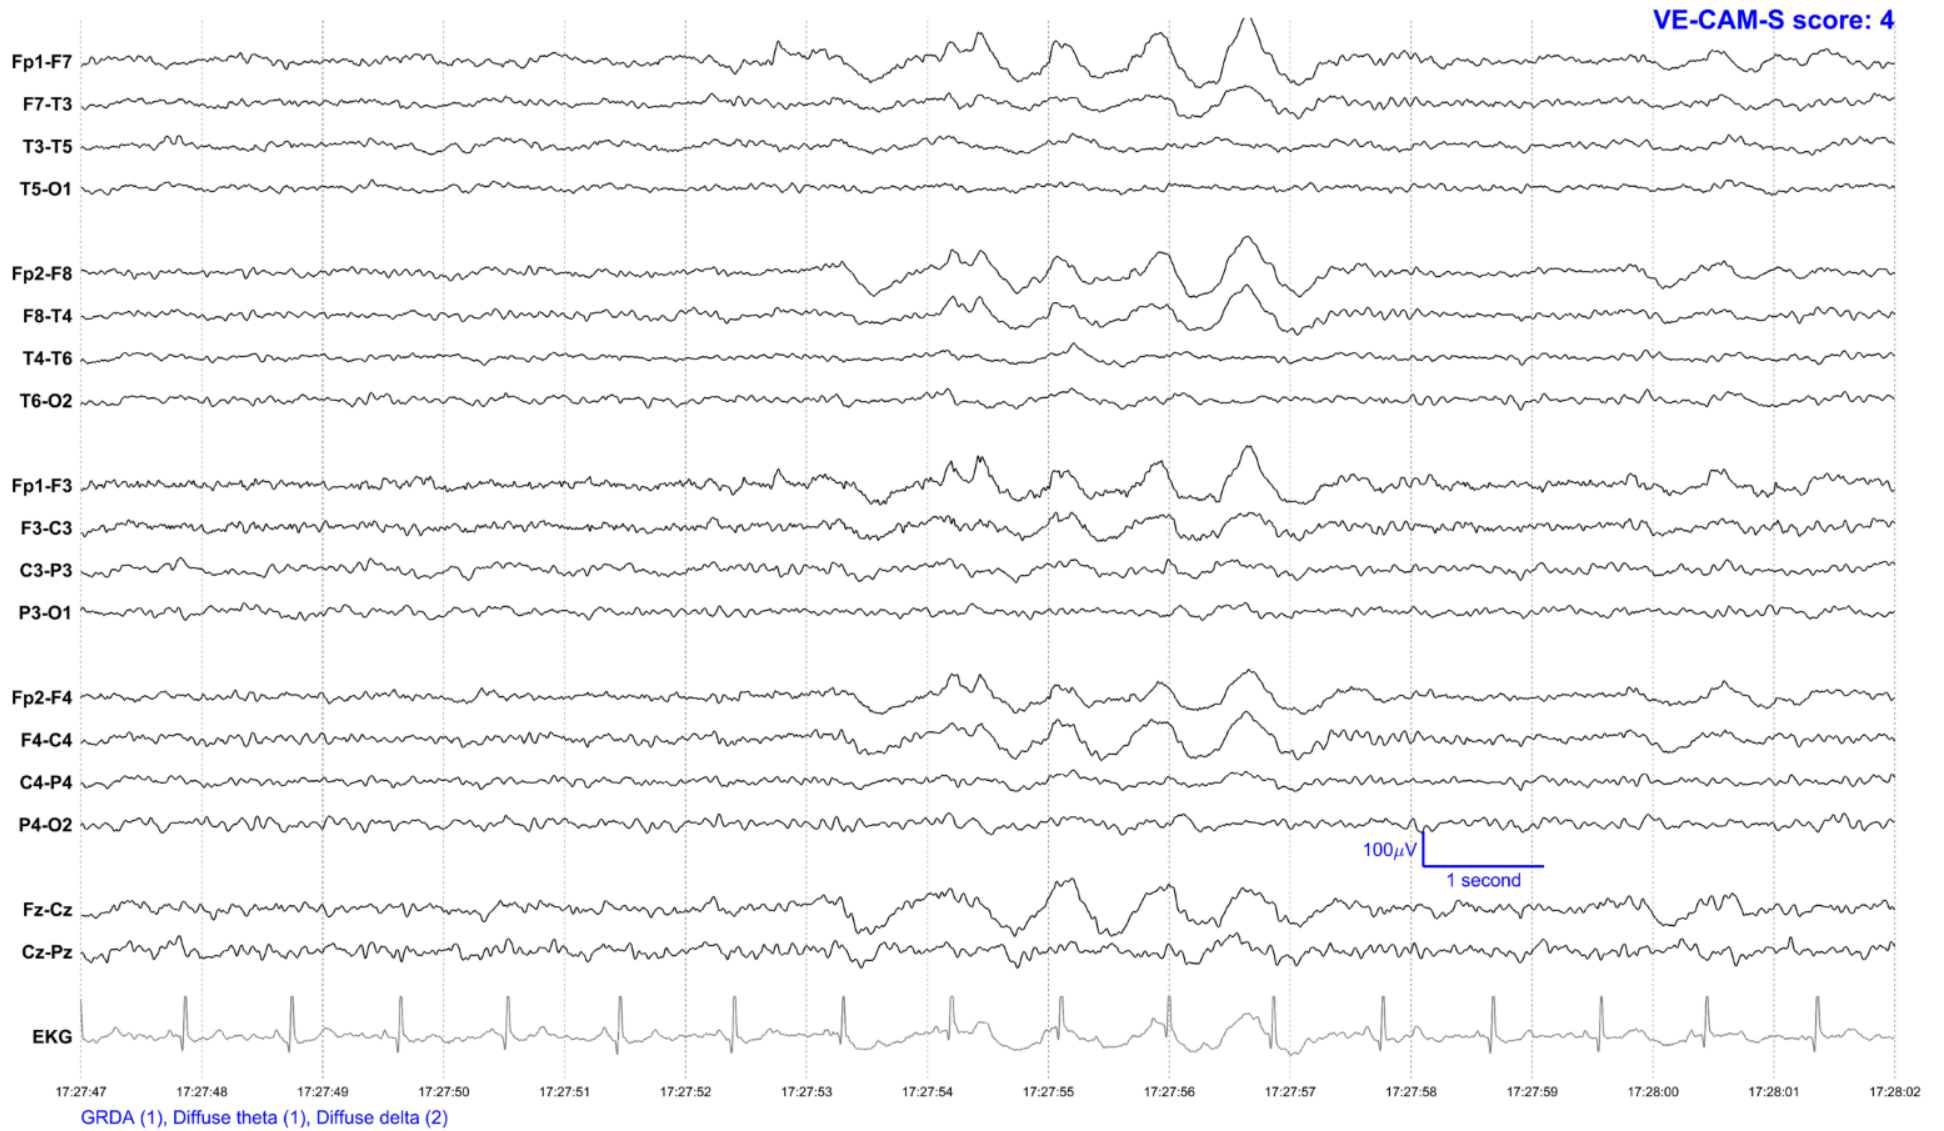

eFigure 11: Example EEG signal for 'Moderate delirium severity'

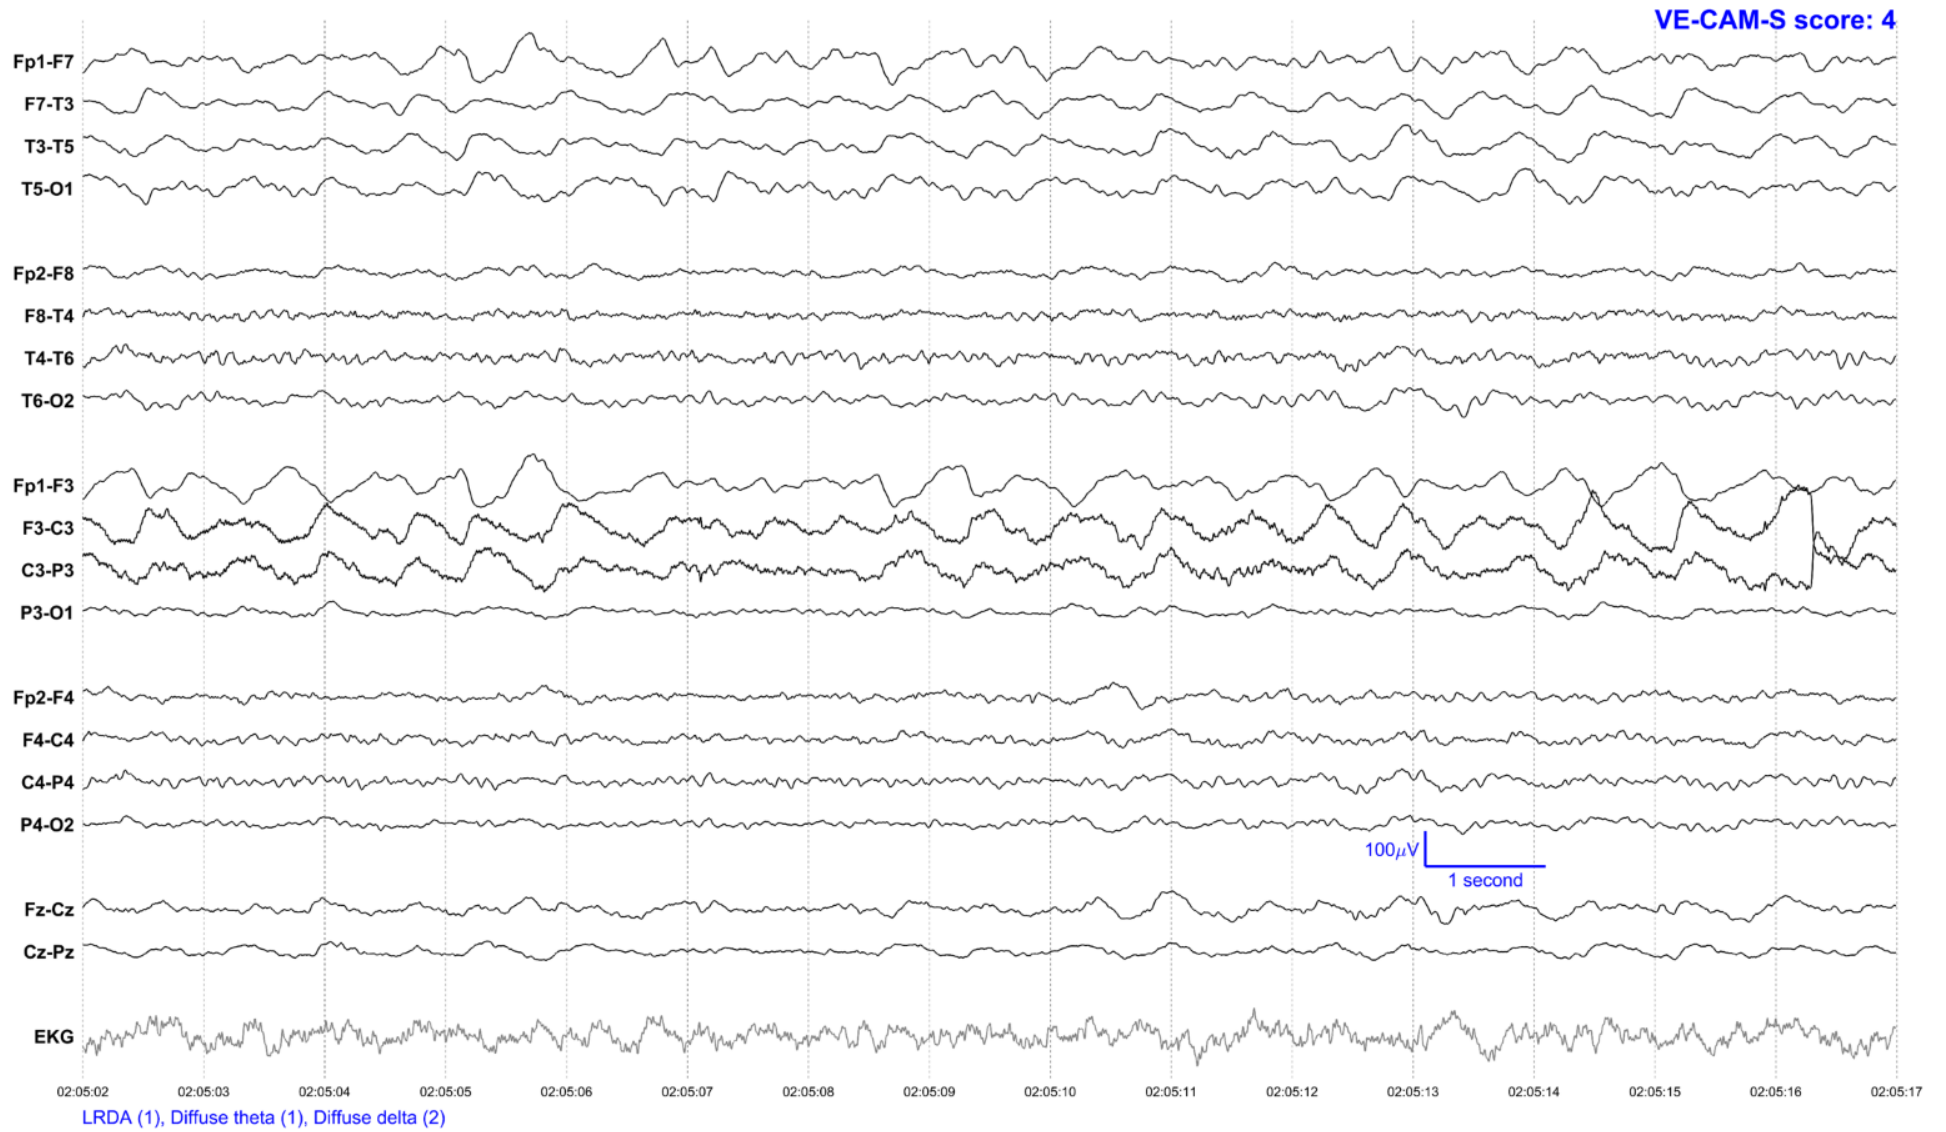

eFigure 12: Example EEG signal for 'Moderate delirium severity'

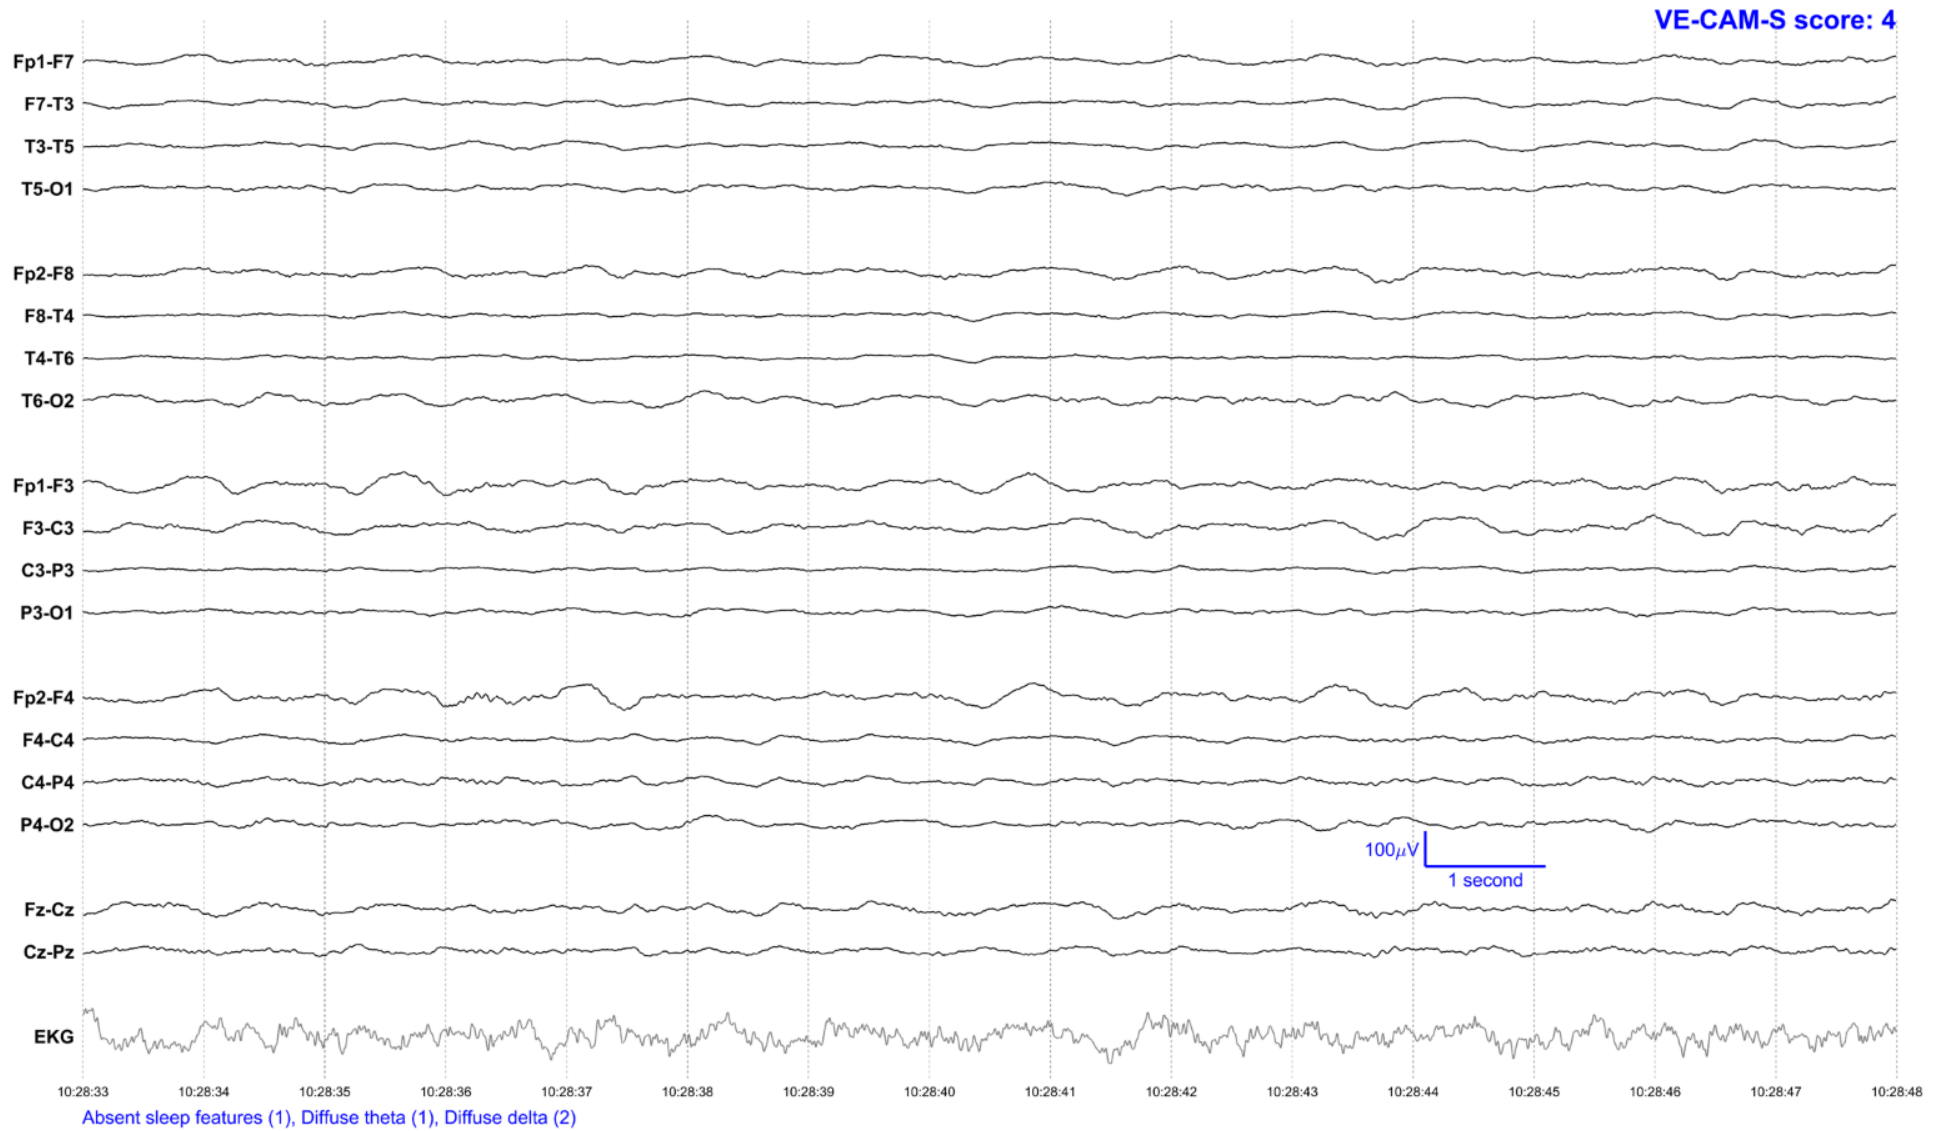

eFigure 13: Example EEG signal for 'Moderate delirium severity'

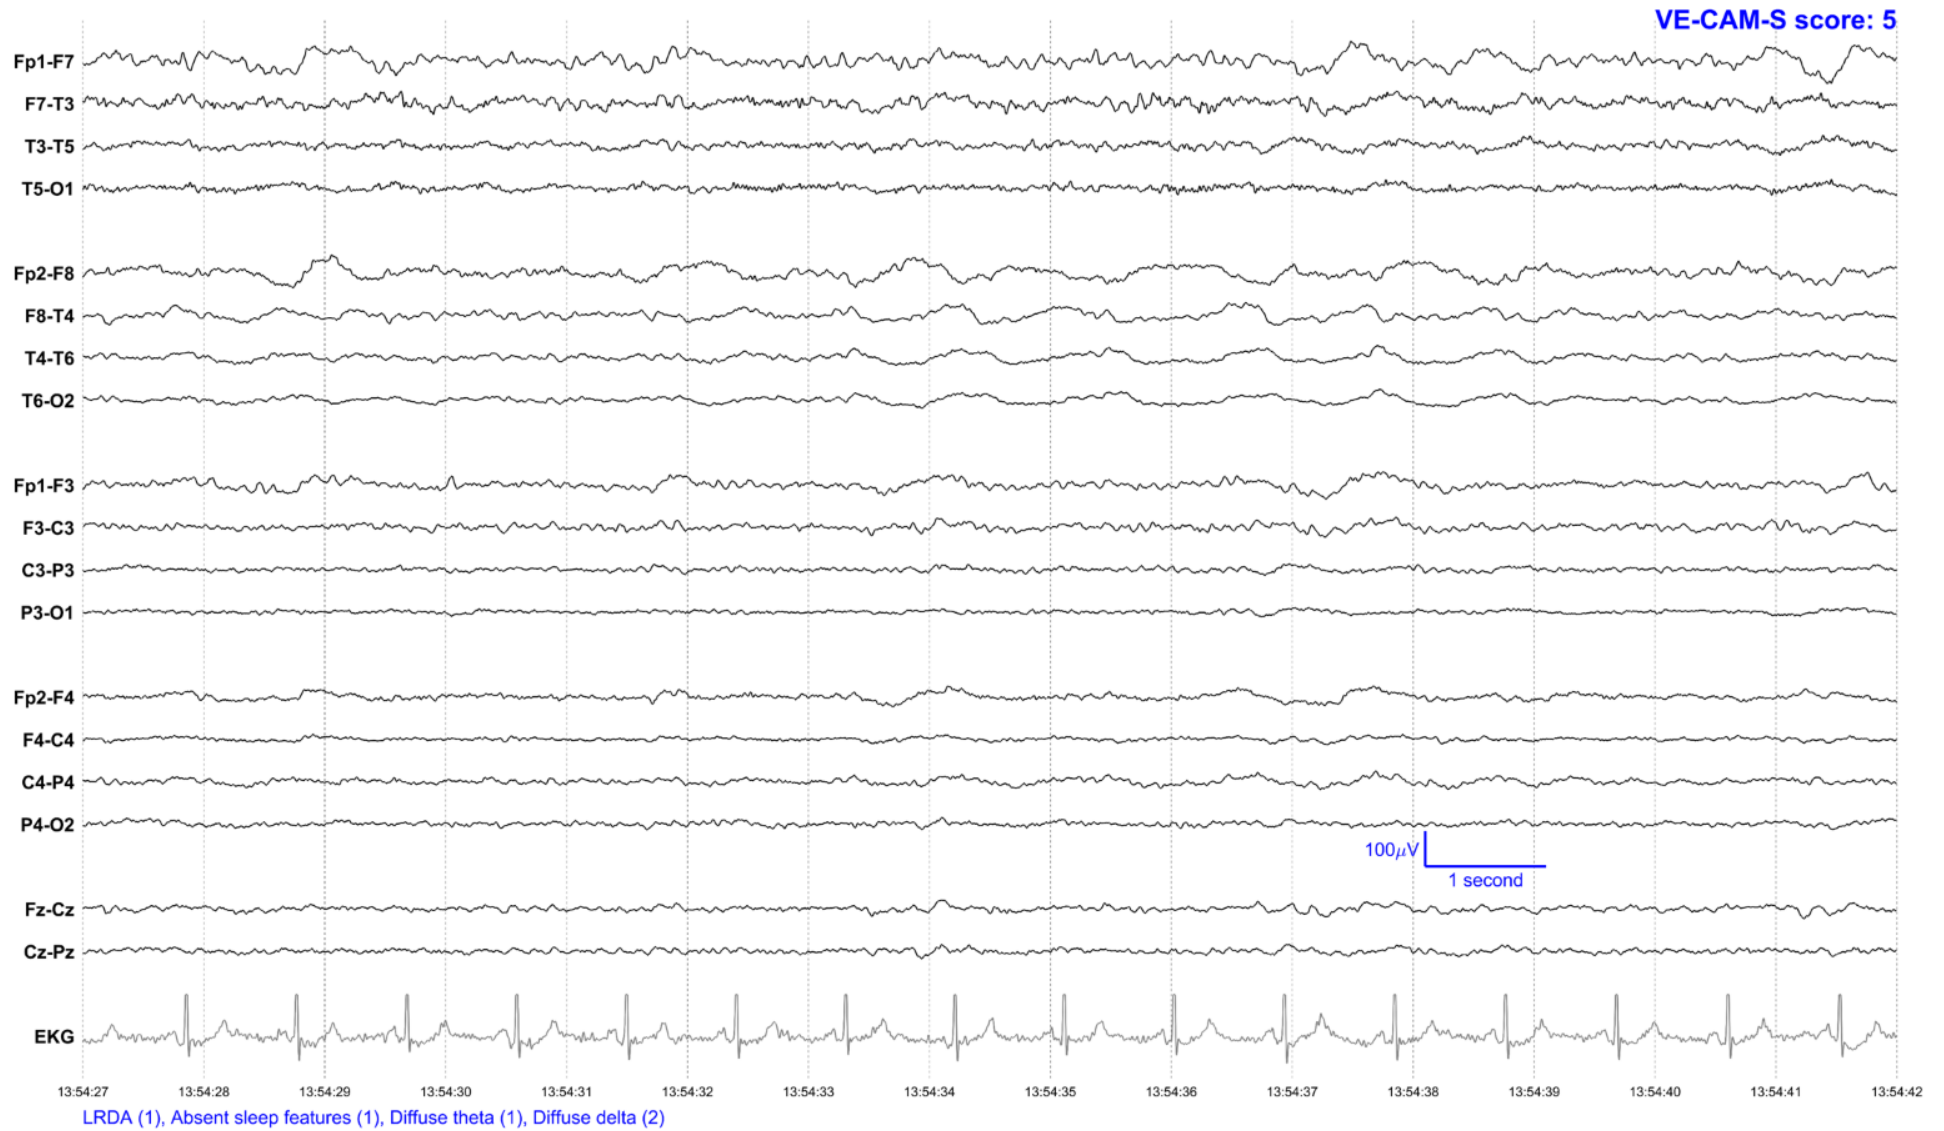

eFigure 14: Example EEG signal for 'Moderate delirium severity'

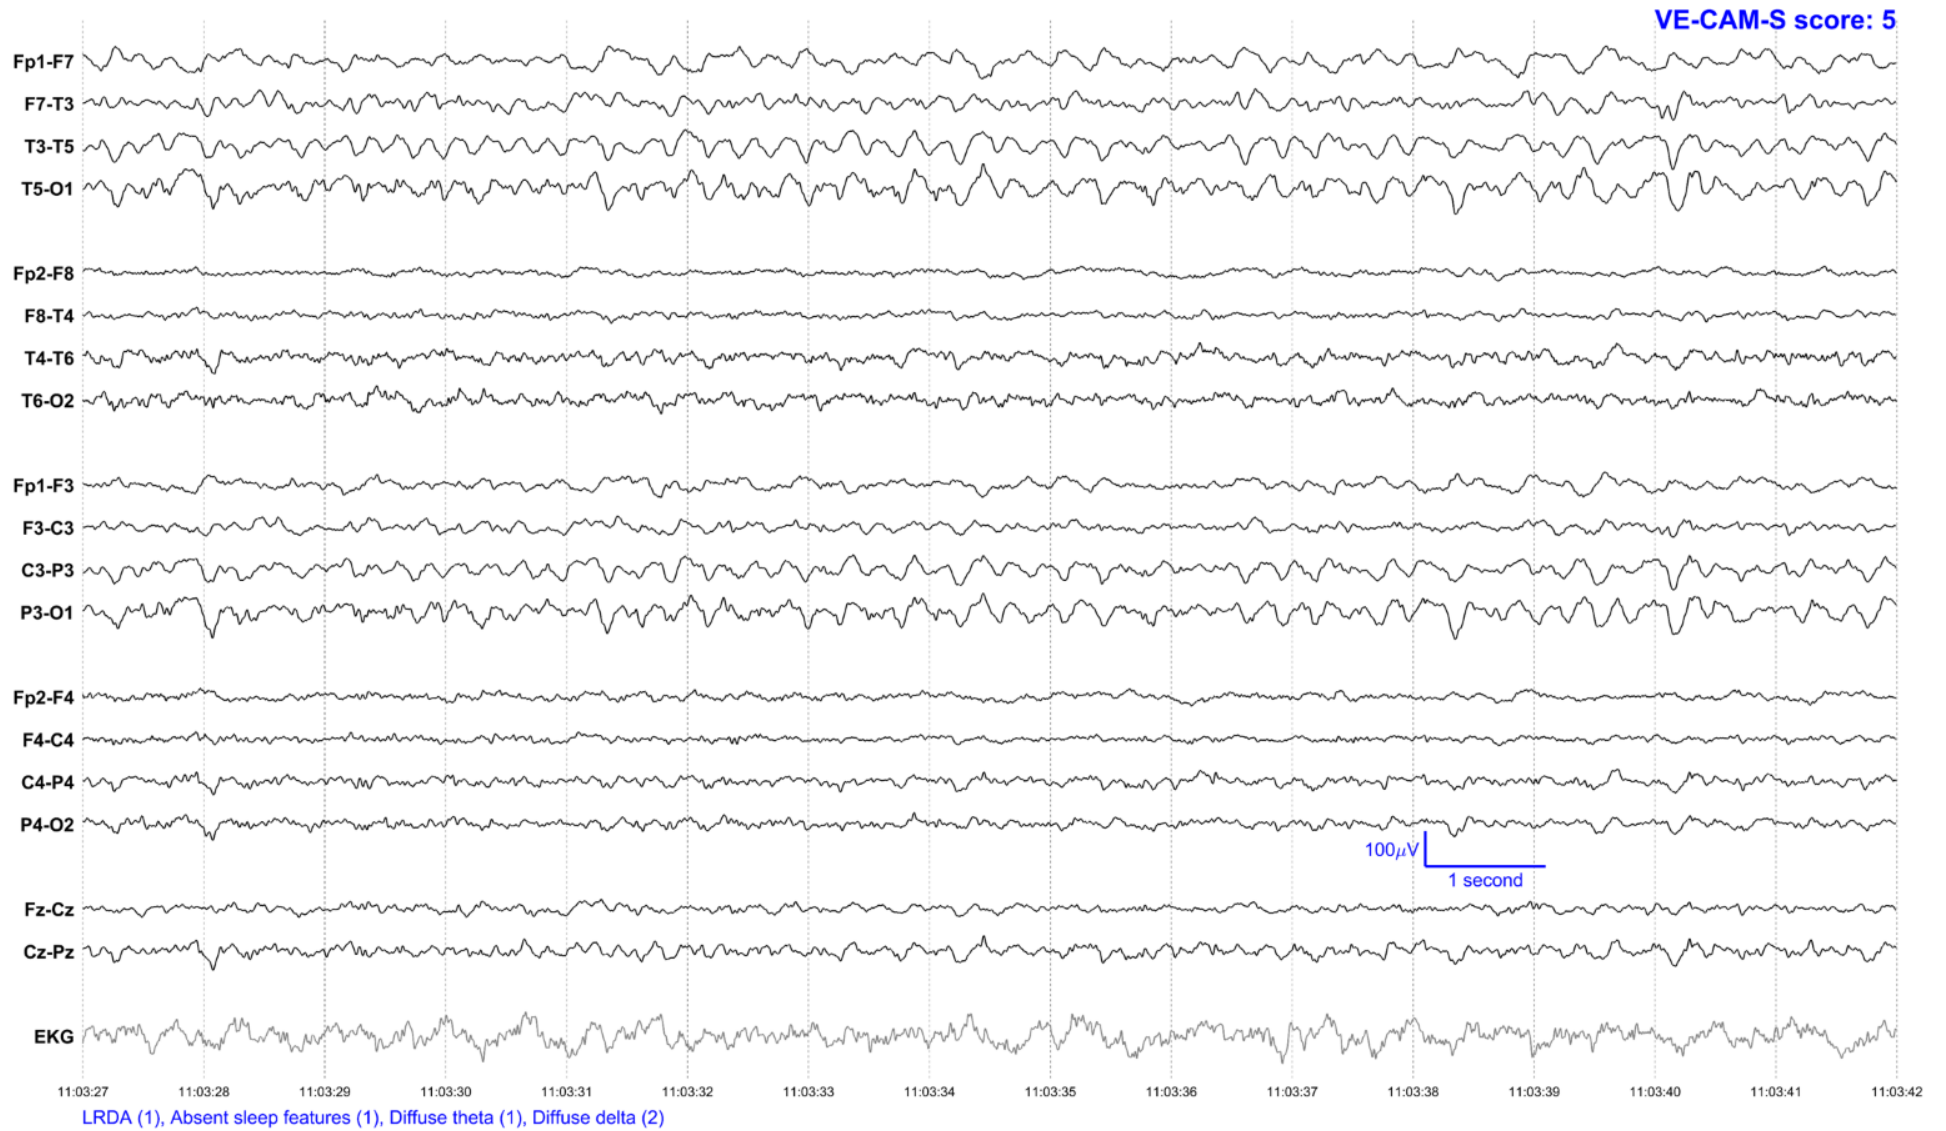

eFigure 15: Example EEG signal for 'Moderate delirium severity'

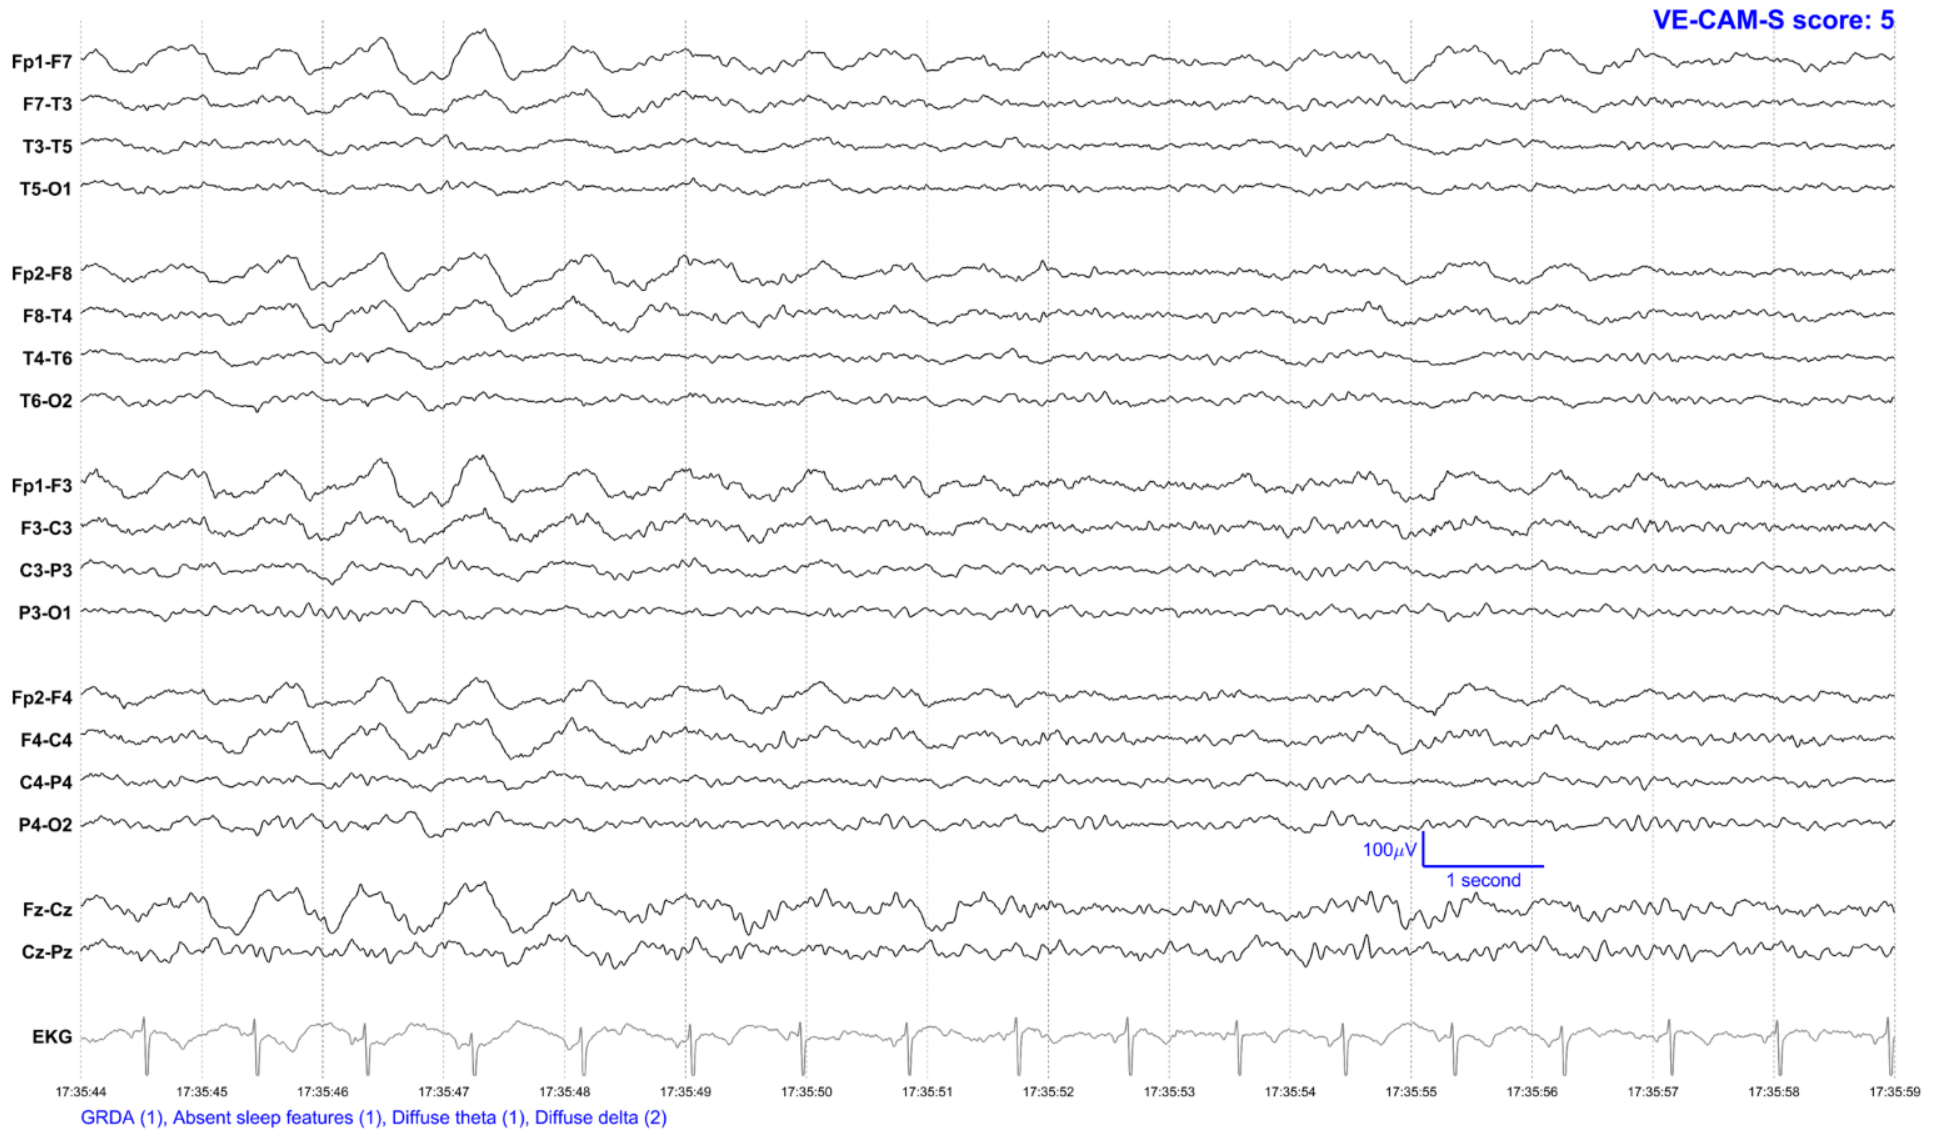

eFigure 16: Example EEG signal for 'Moderate delirium severity'

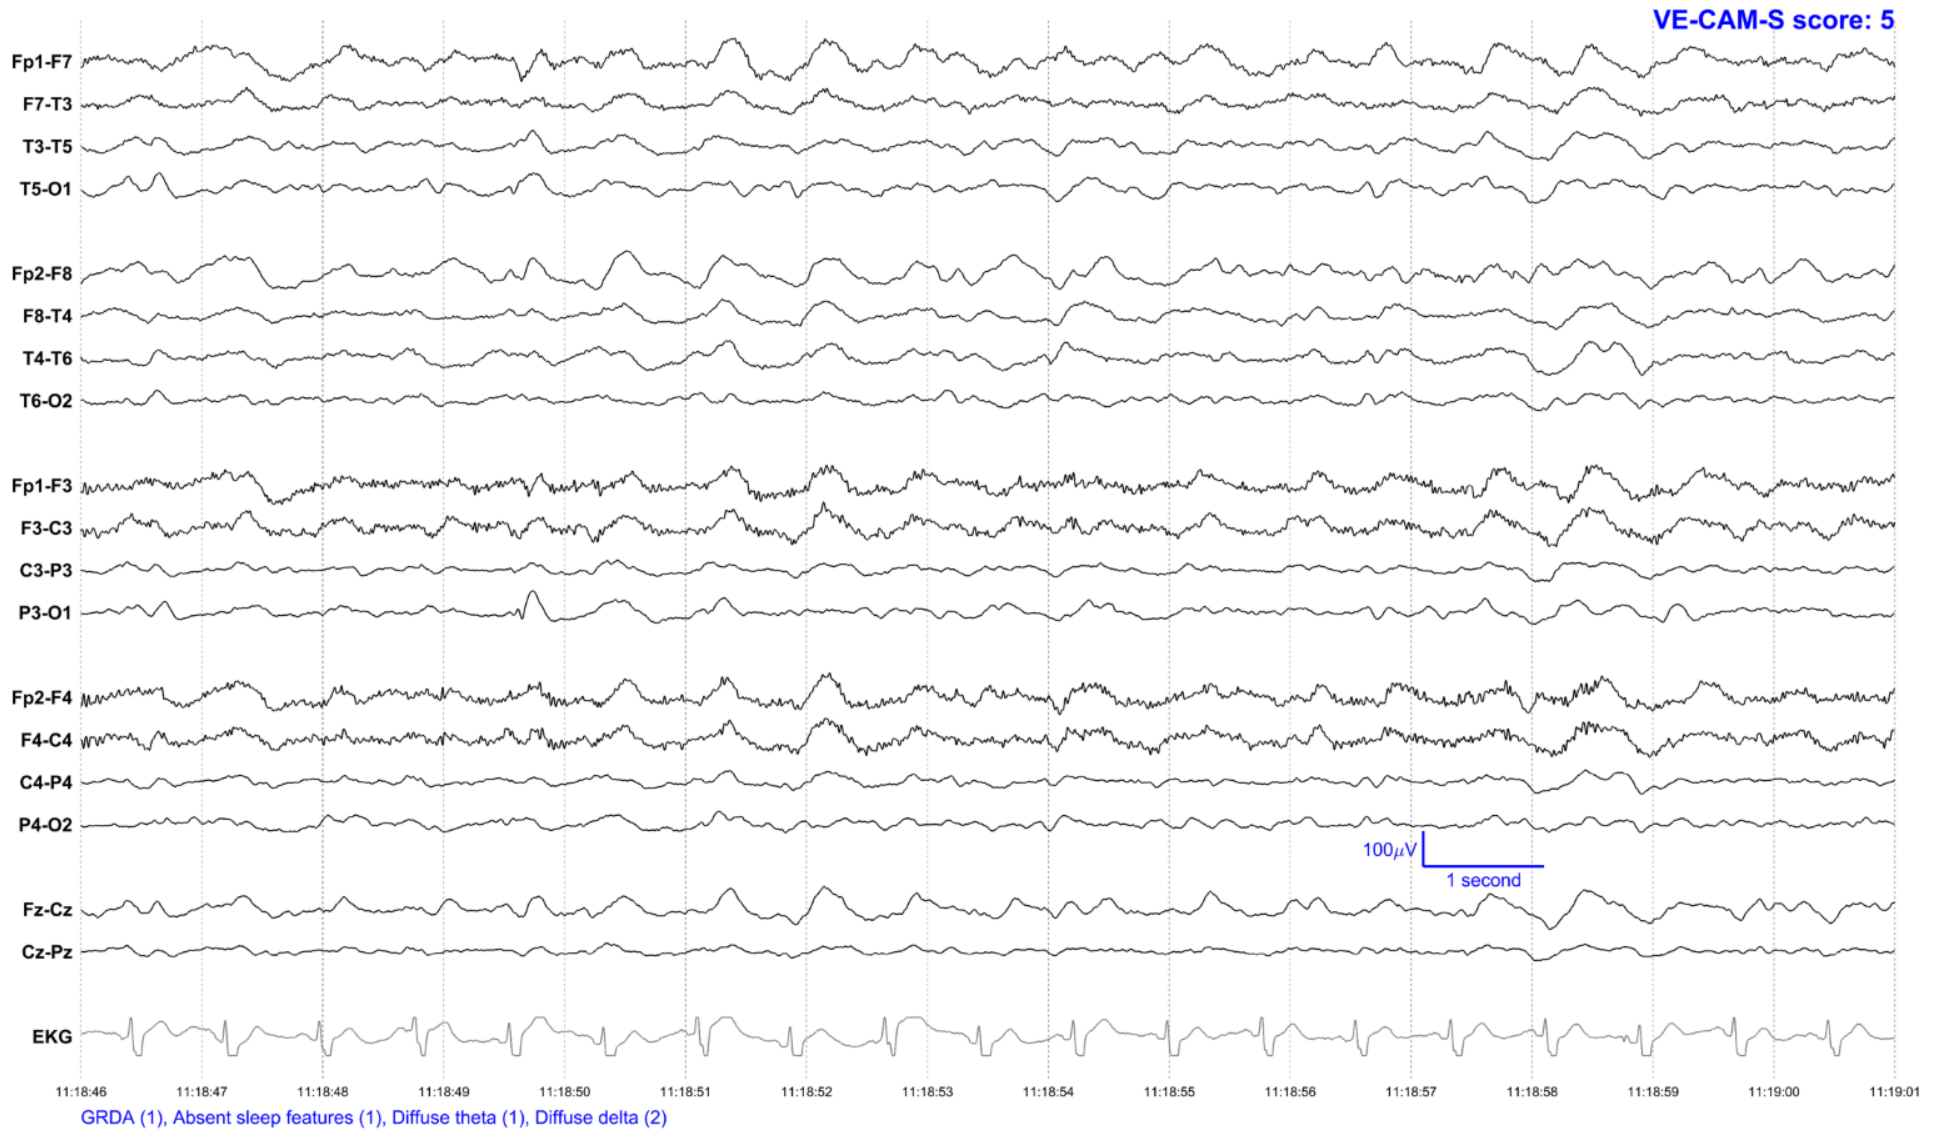



eFigure 17: Example EEG signal for 'Moderate delirium severity'

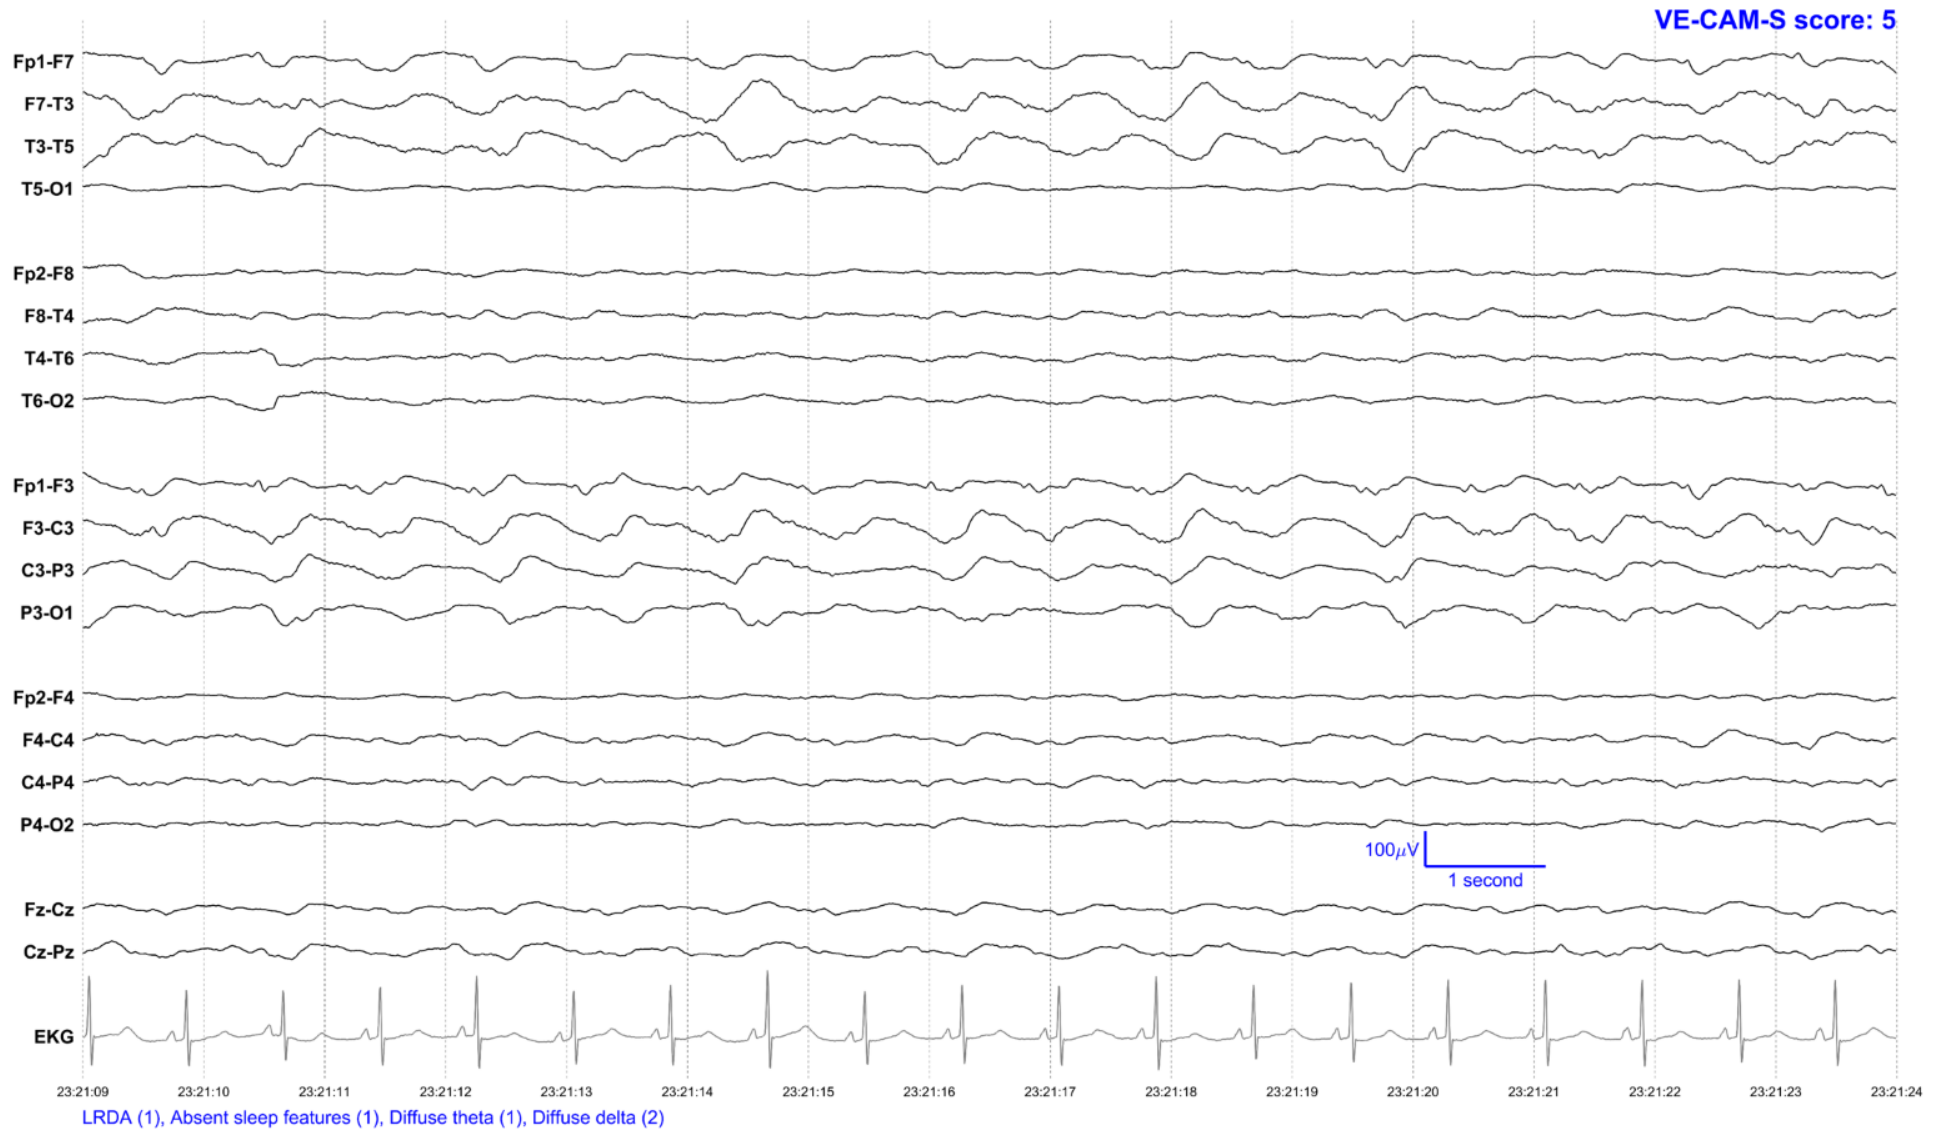

eFigure 18: Example EEG signal for 'Moderate delirium severity'

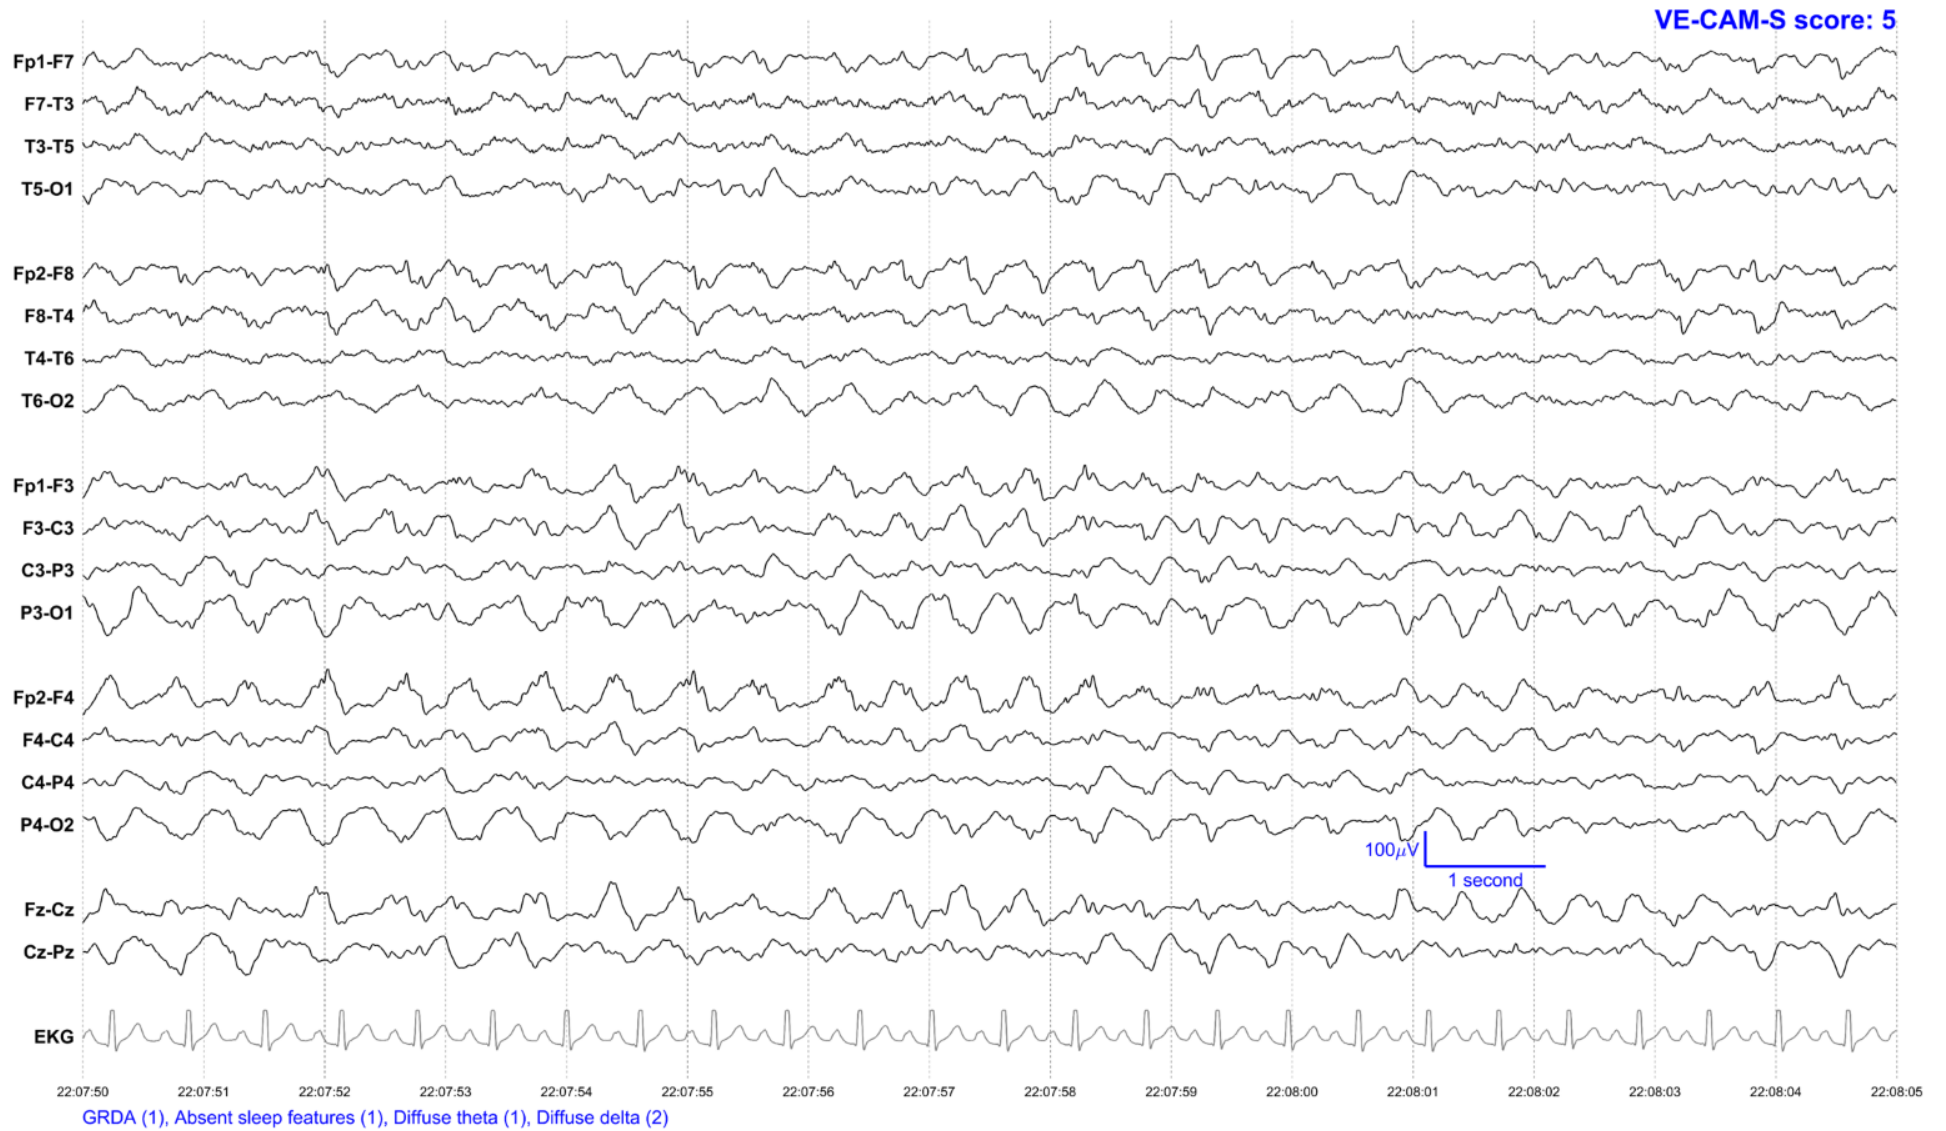

eFigure 19: Example EEG signal for 'Moderate delirium severity'

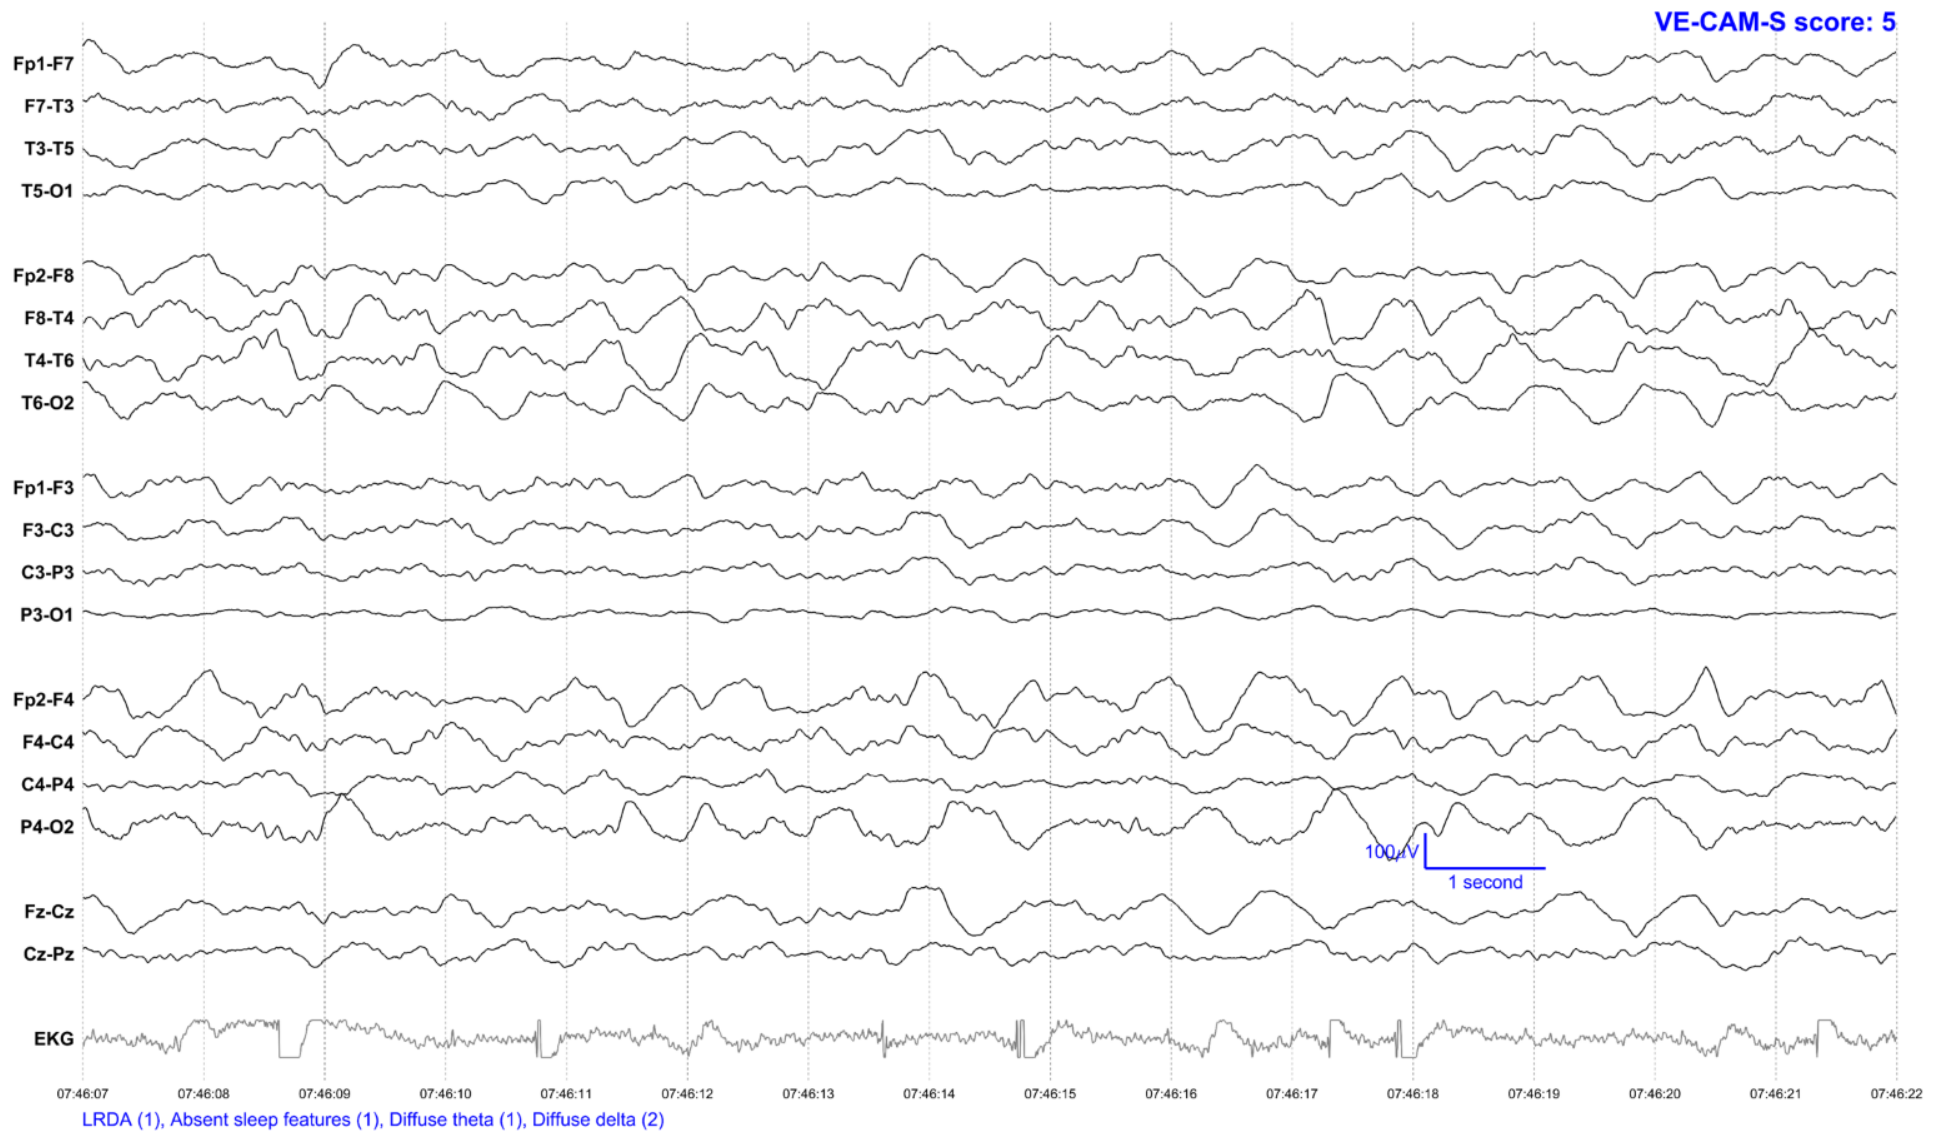

eFigure 20: Example EEG signal for 'Moderate delirium severity'

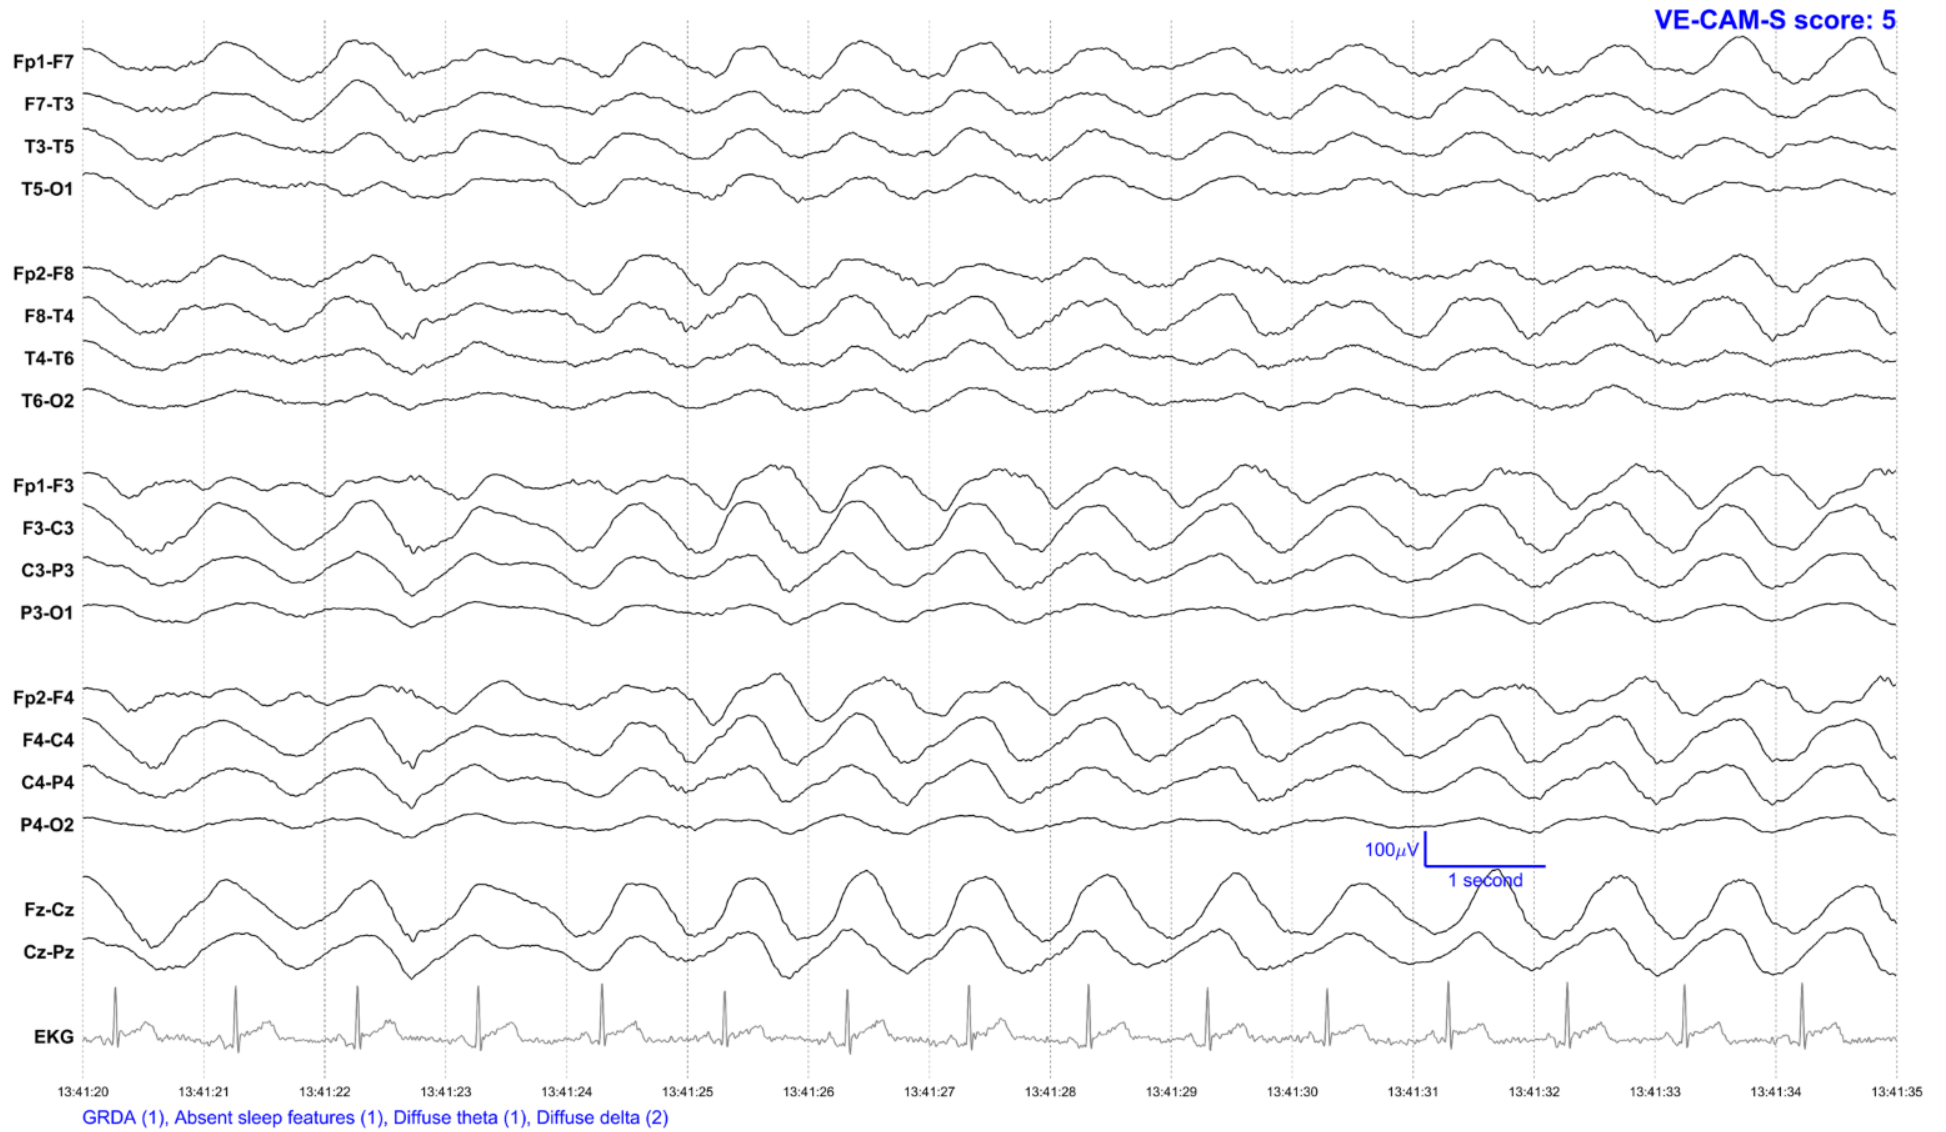

eFigure 21: Example EEG signal for 'Moderate delirium severity'

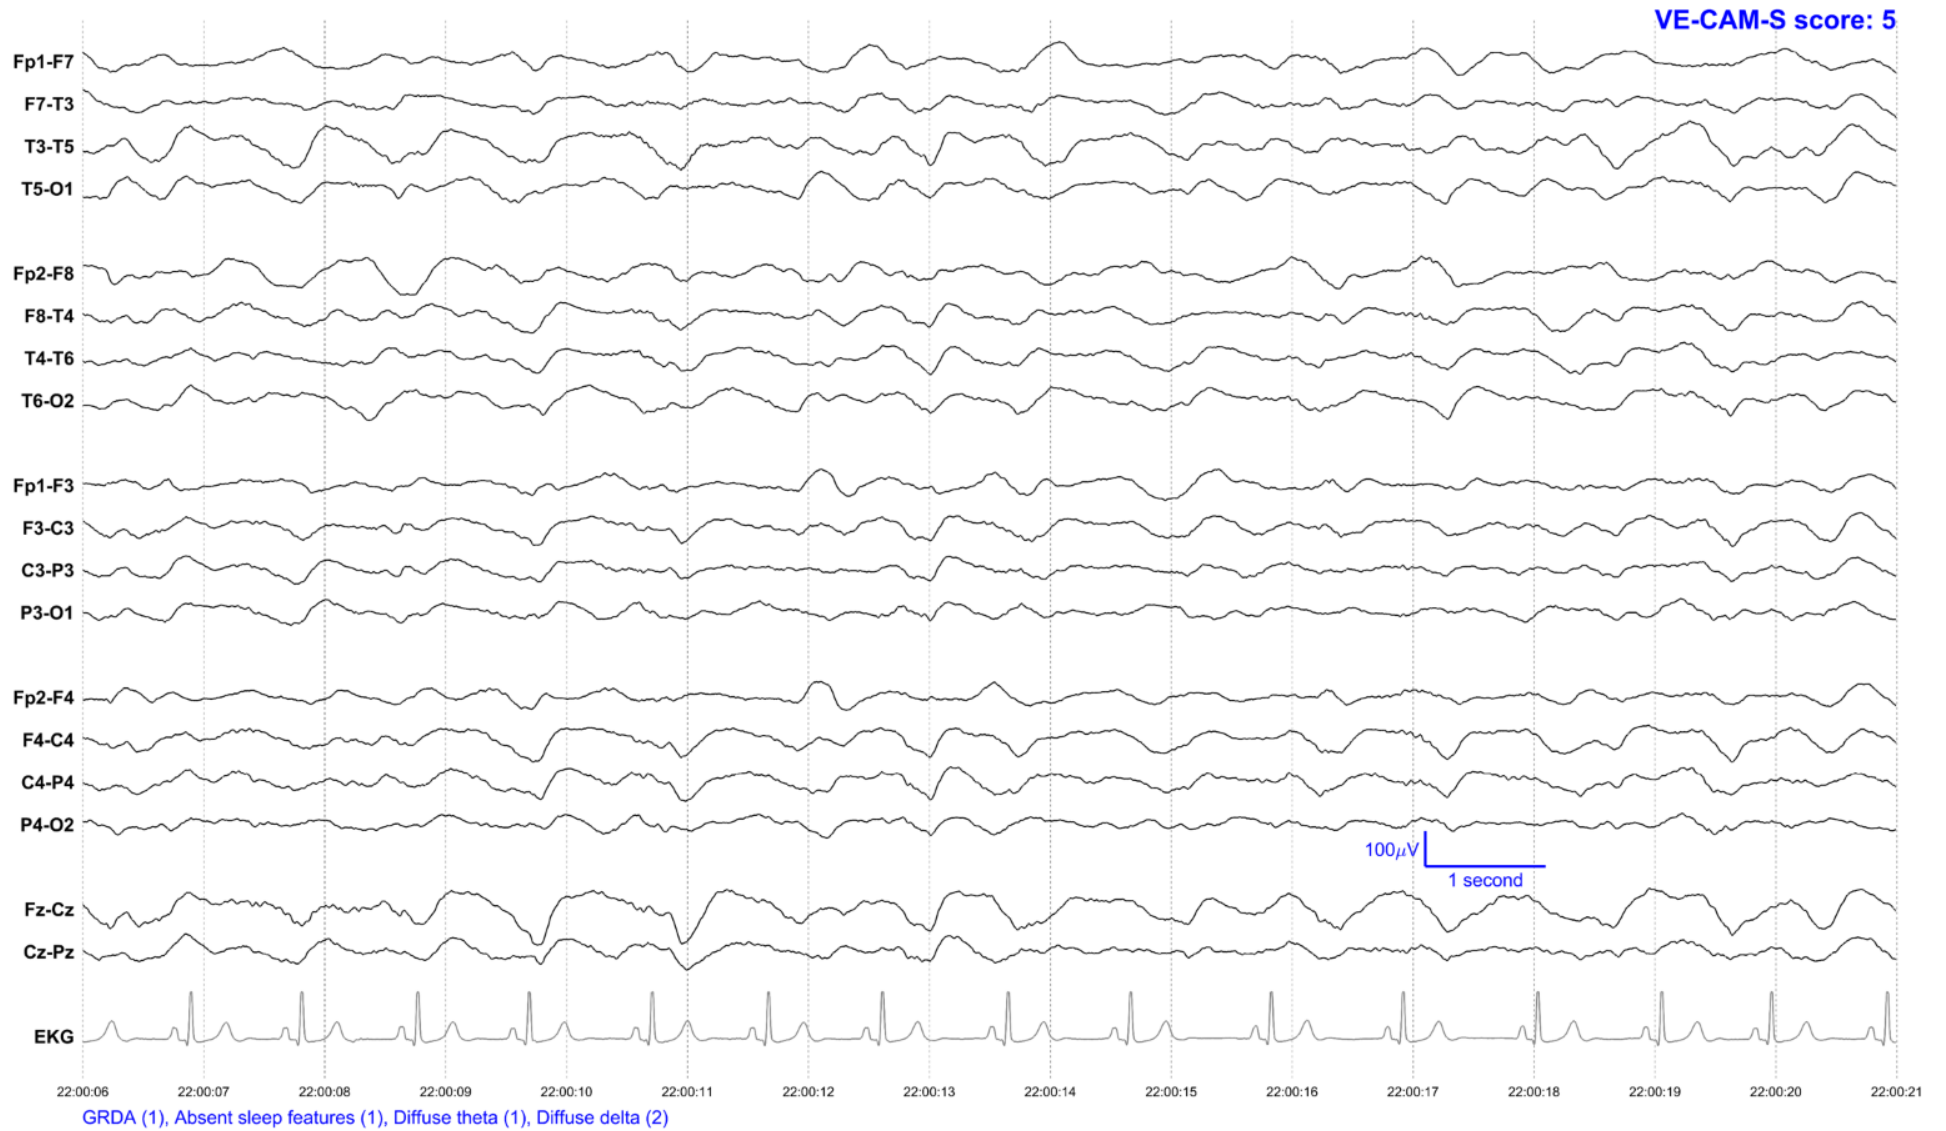

eFigure 22: Example EEG signal for 'Moderate delirium severity'

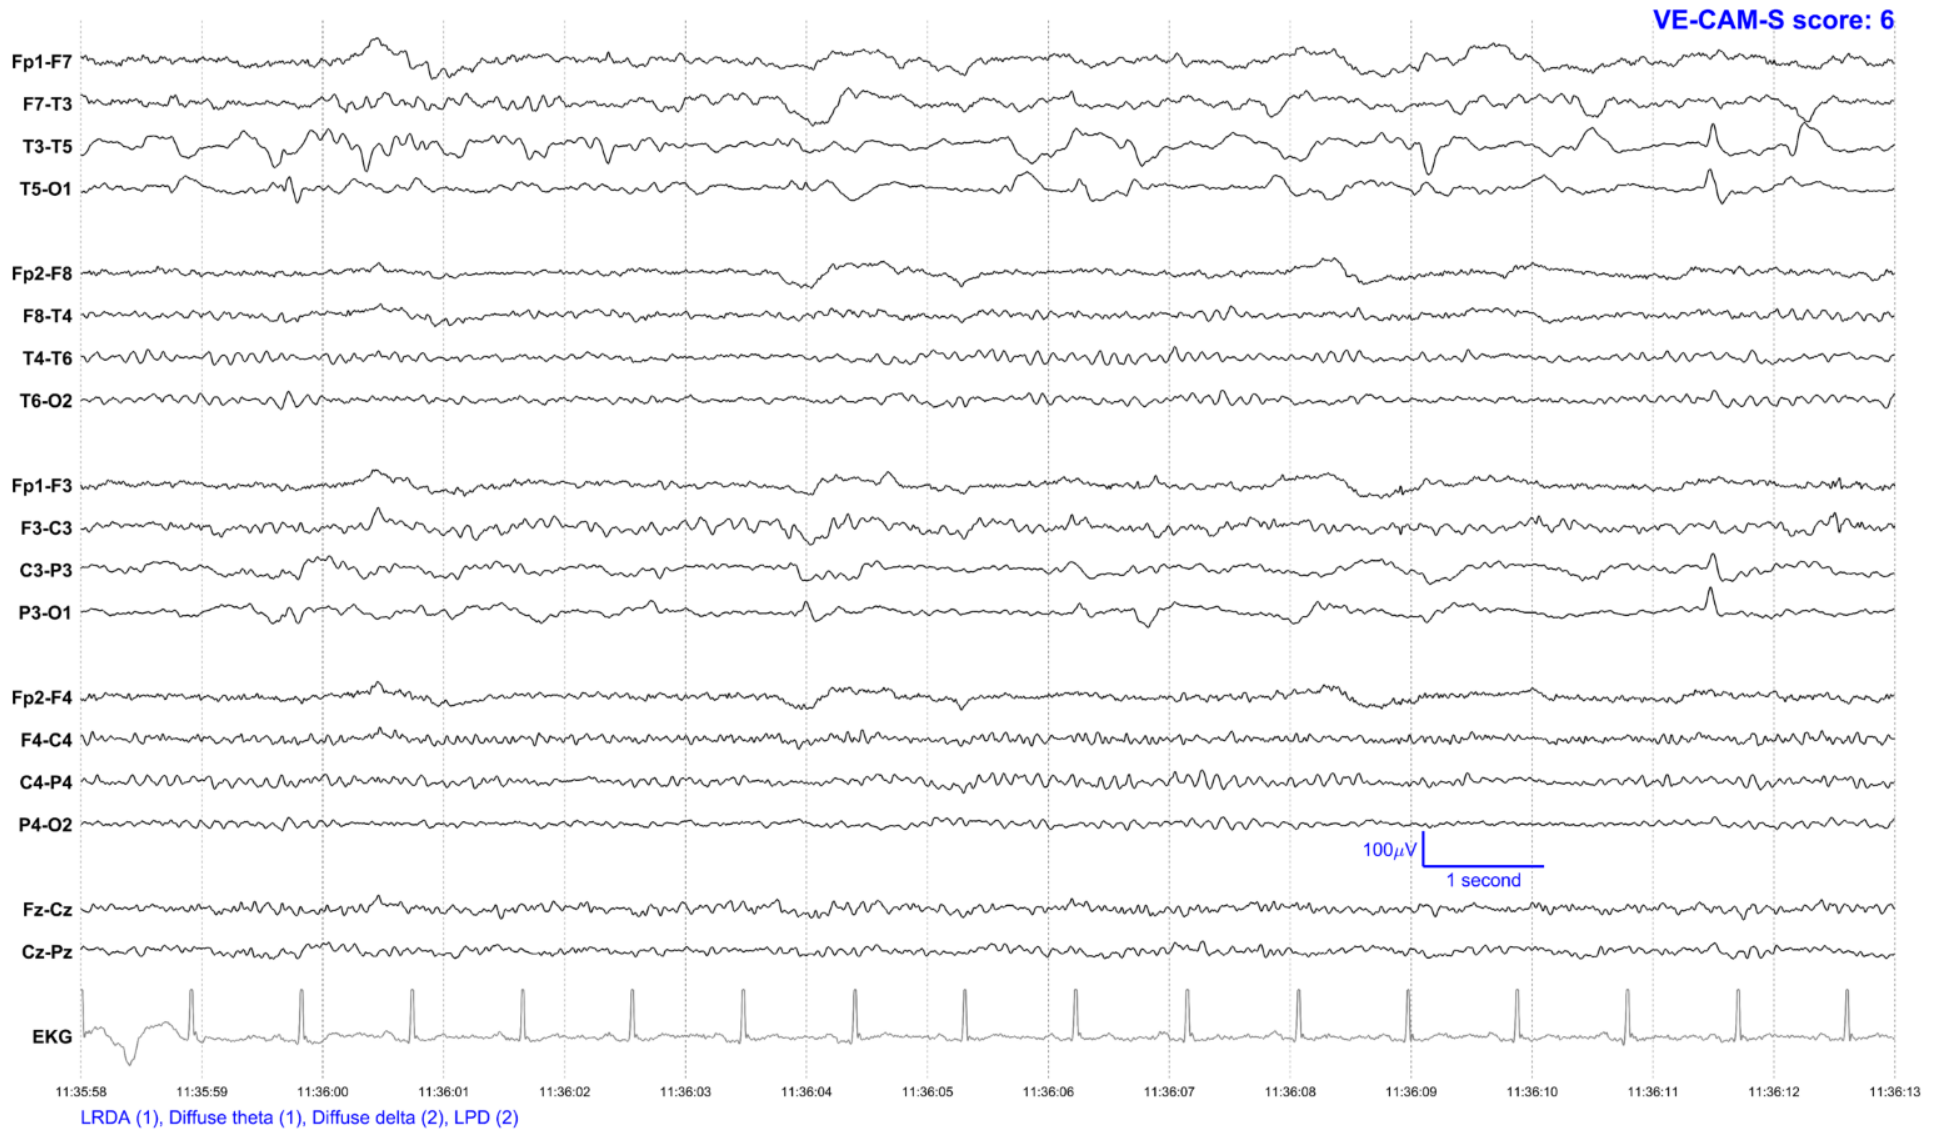

eFigure 23: Example EEG signal for 'Moderate delirium severity'

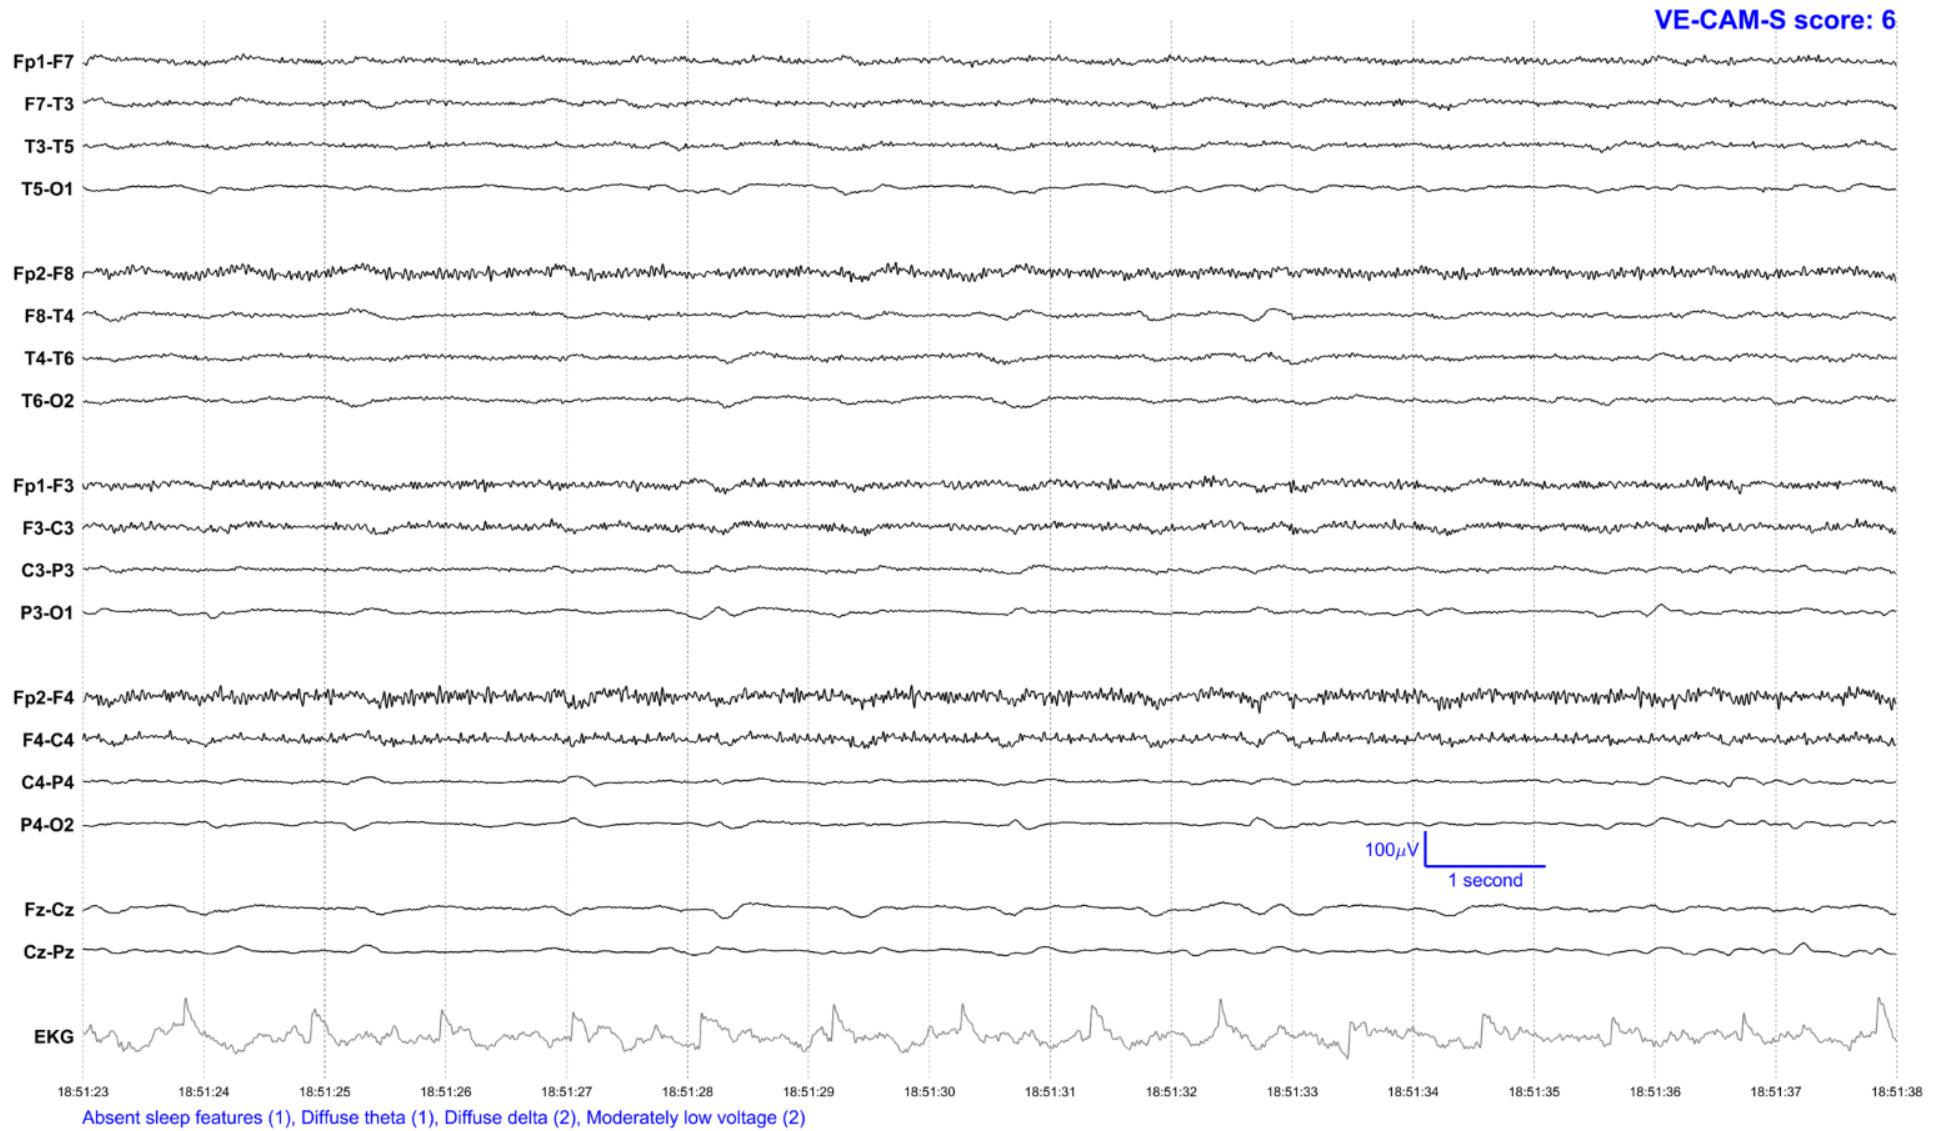

eFigure 24: Example EEG signal for 'Moderate delirium severity'

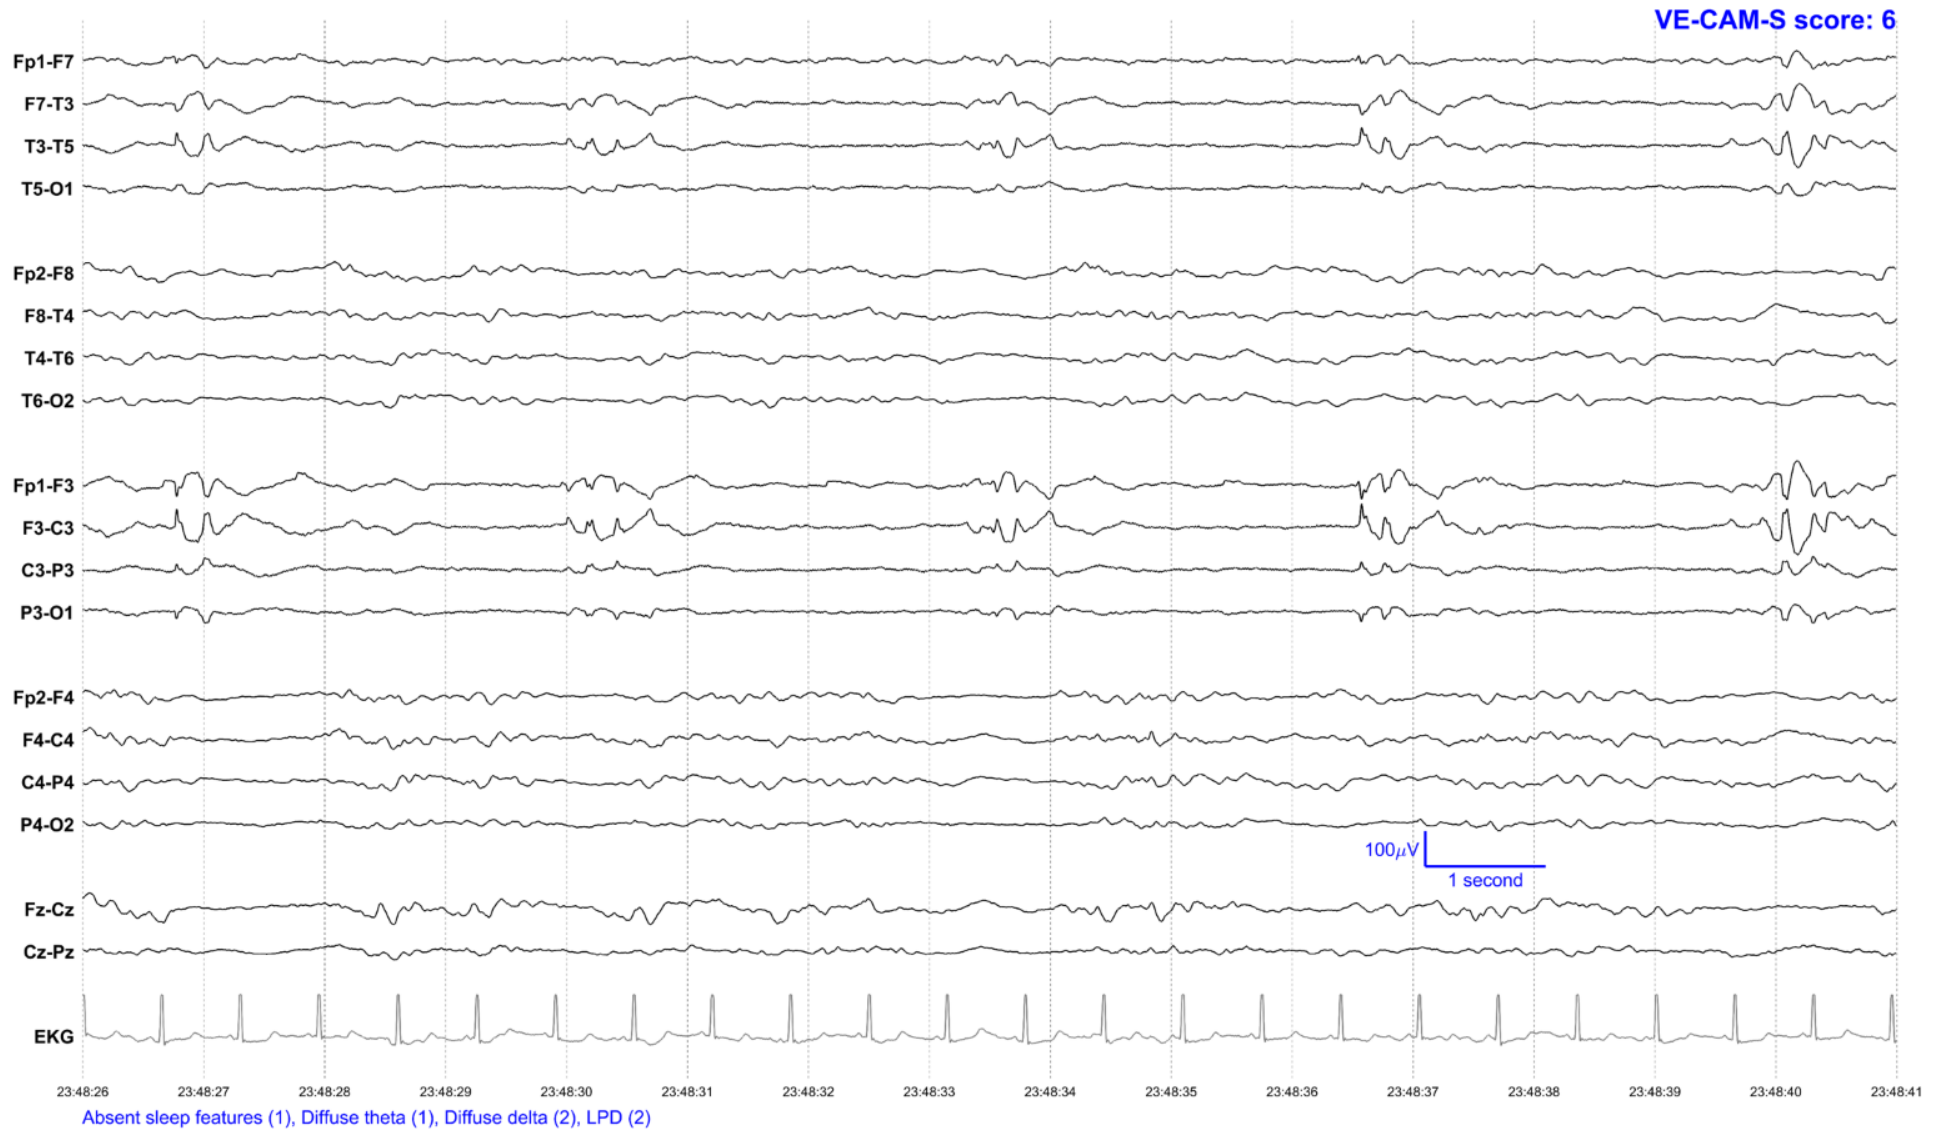



eFigure 25: Example EEG signal for 'Moderate delirium severity'

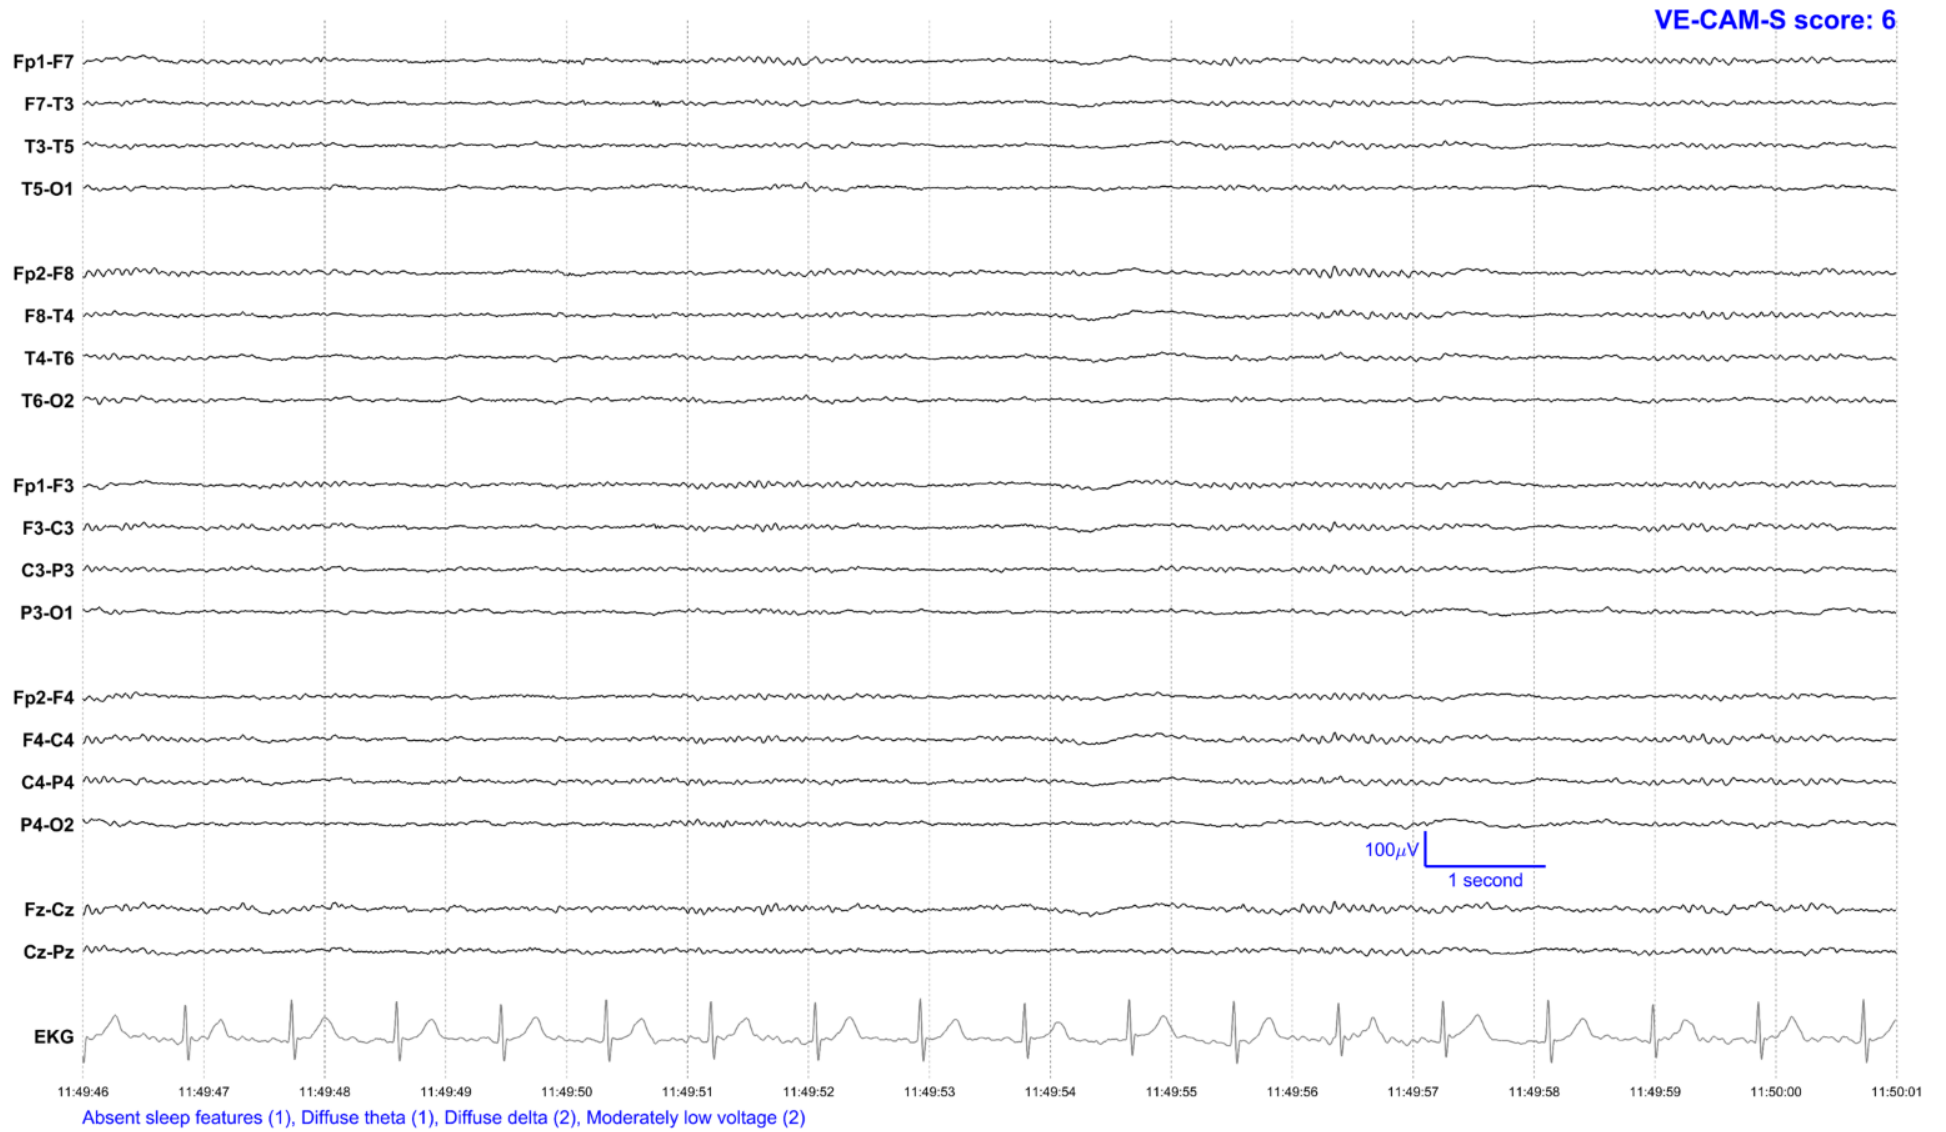

eFigure 26: Example EEG signal for 'Moderate delirium severity'

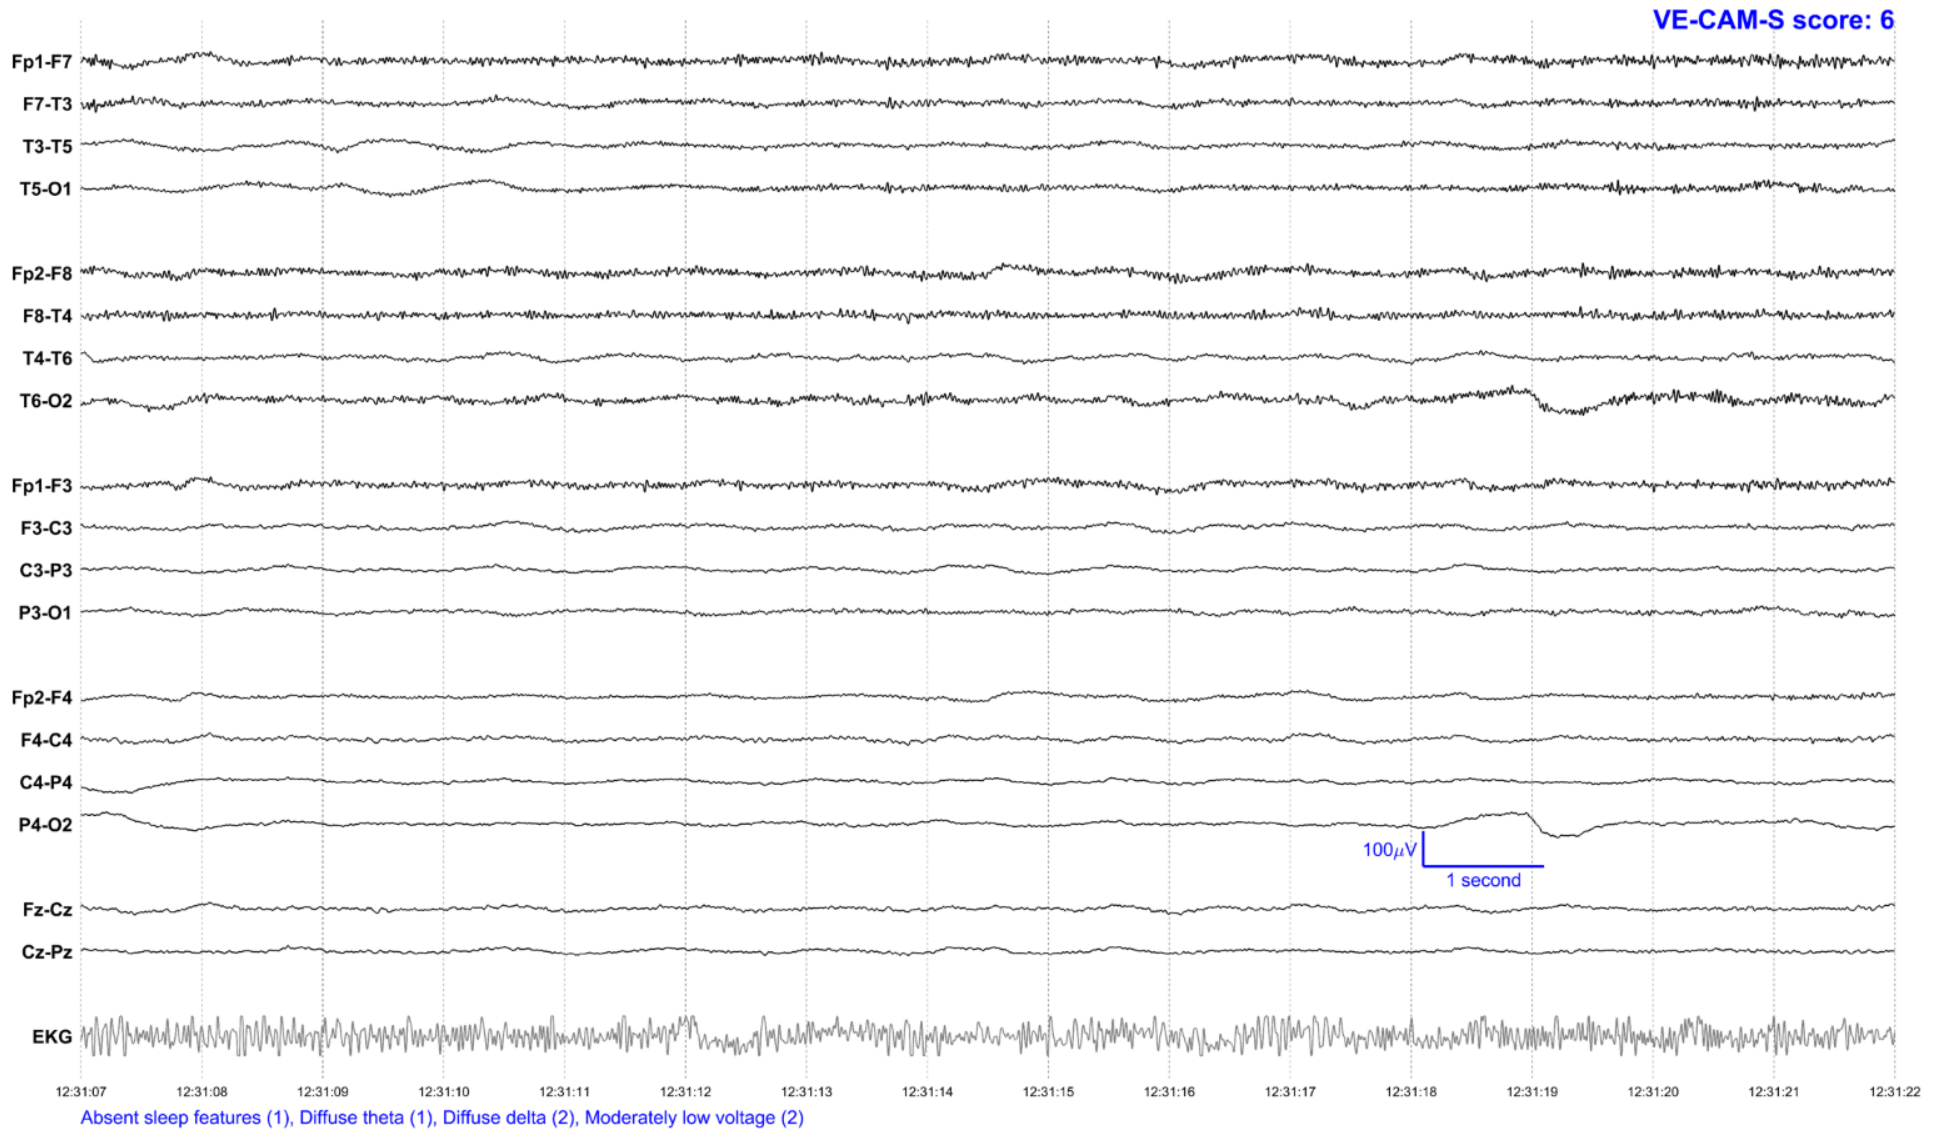

eFigure 27: Example EEG signal for 'Moderate delirium severity'

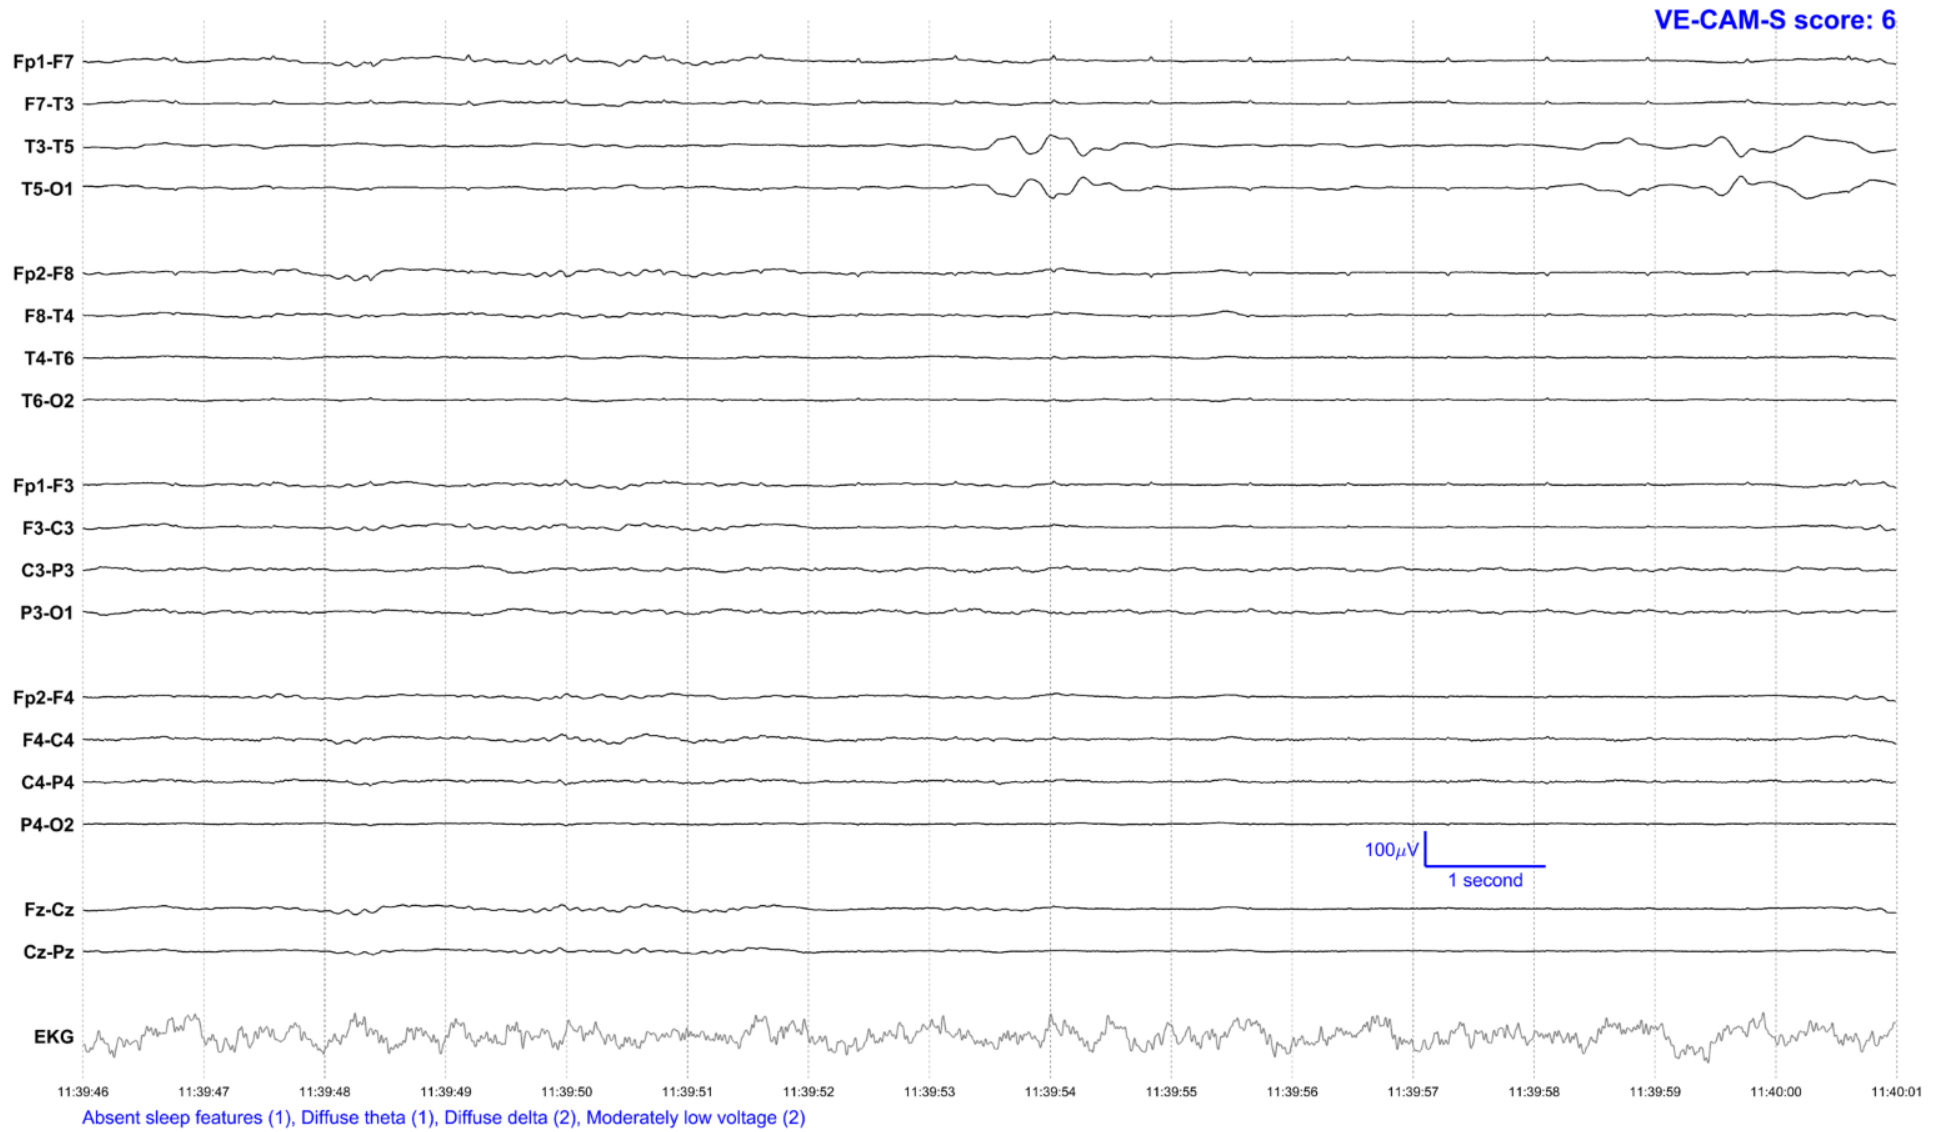

eFigure 28: Example EEG signal for 'Moderate delirium severity'

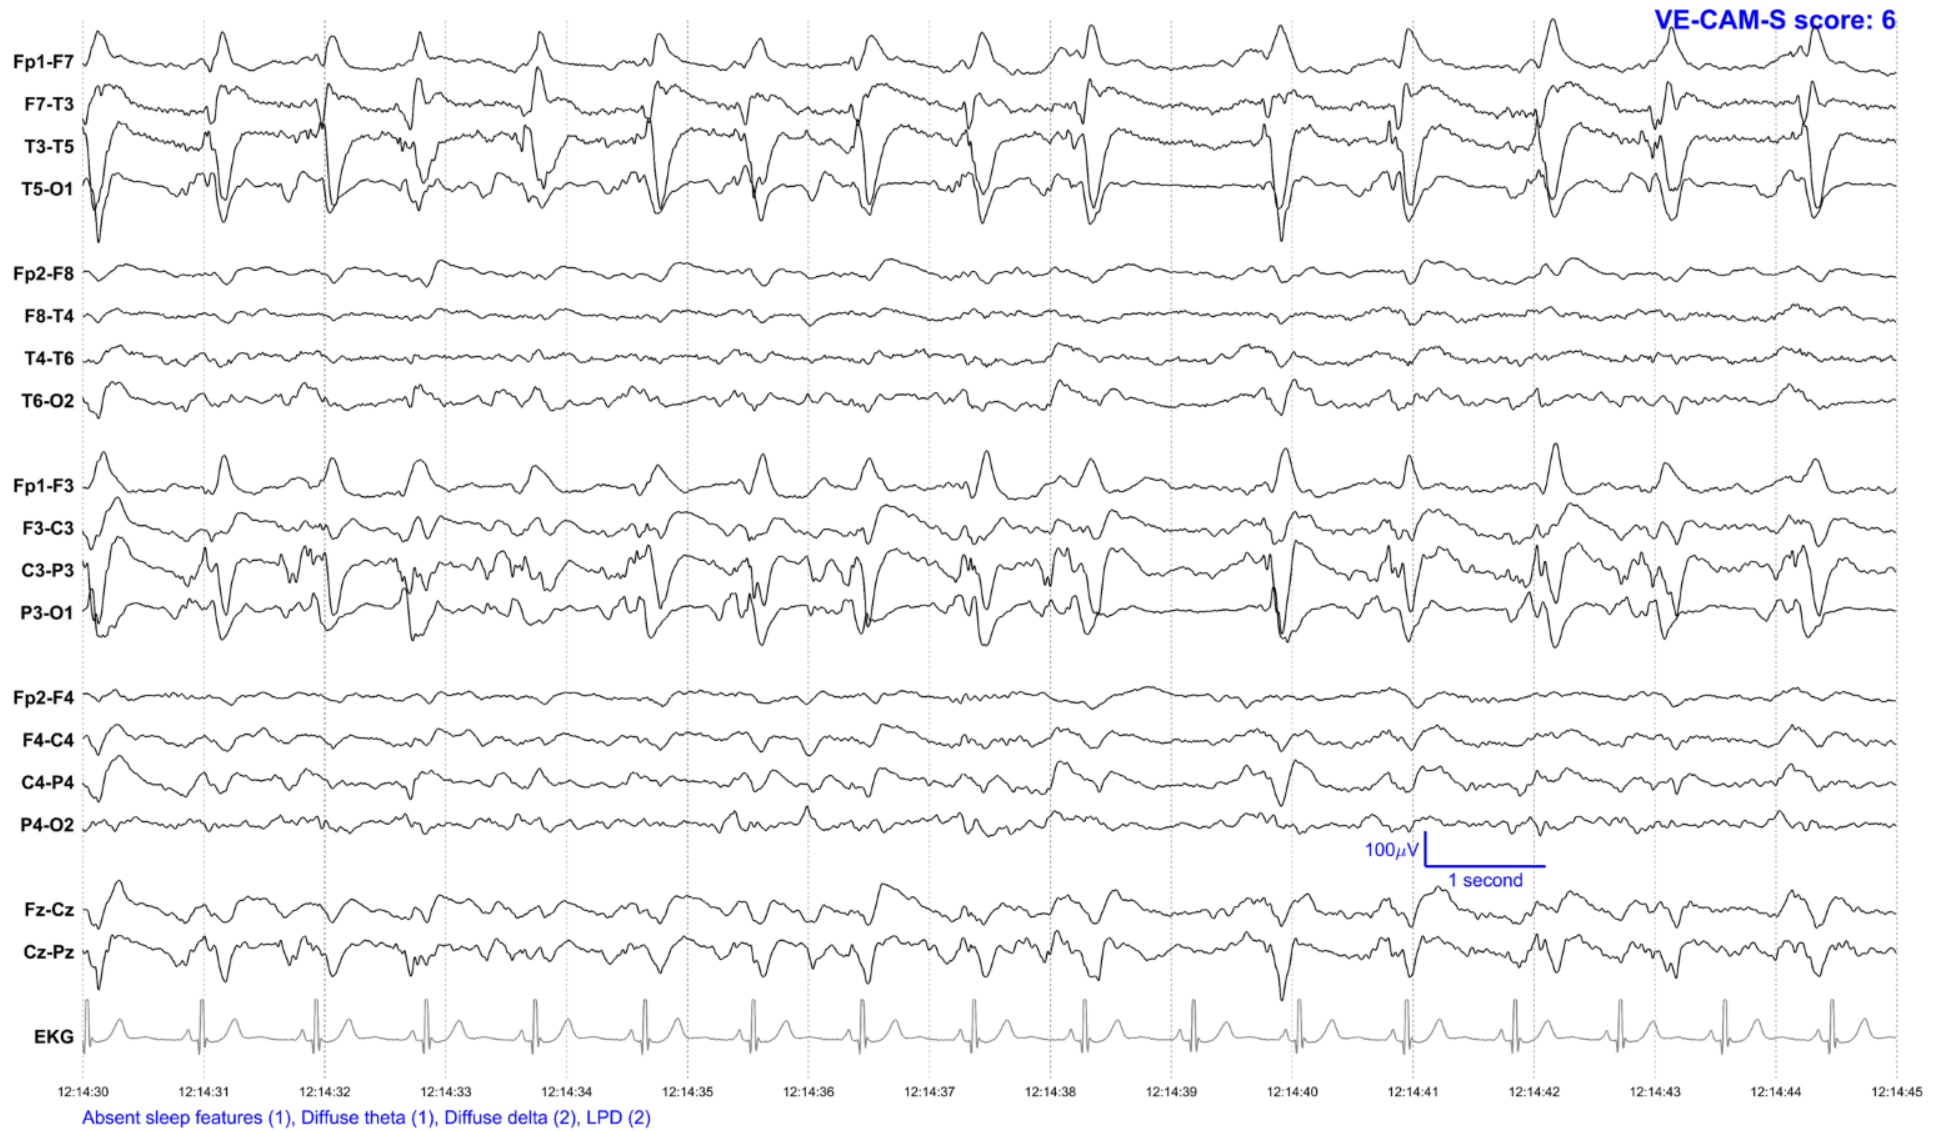

eFigure 29: Example EEG signal for 'Moderate delirium severity'

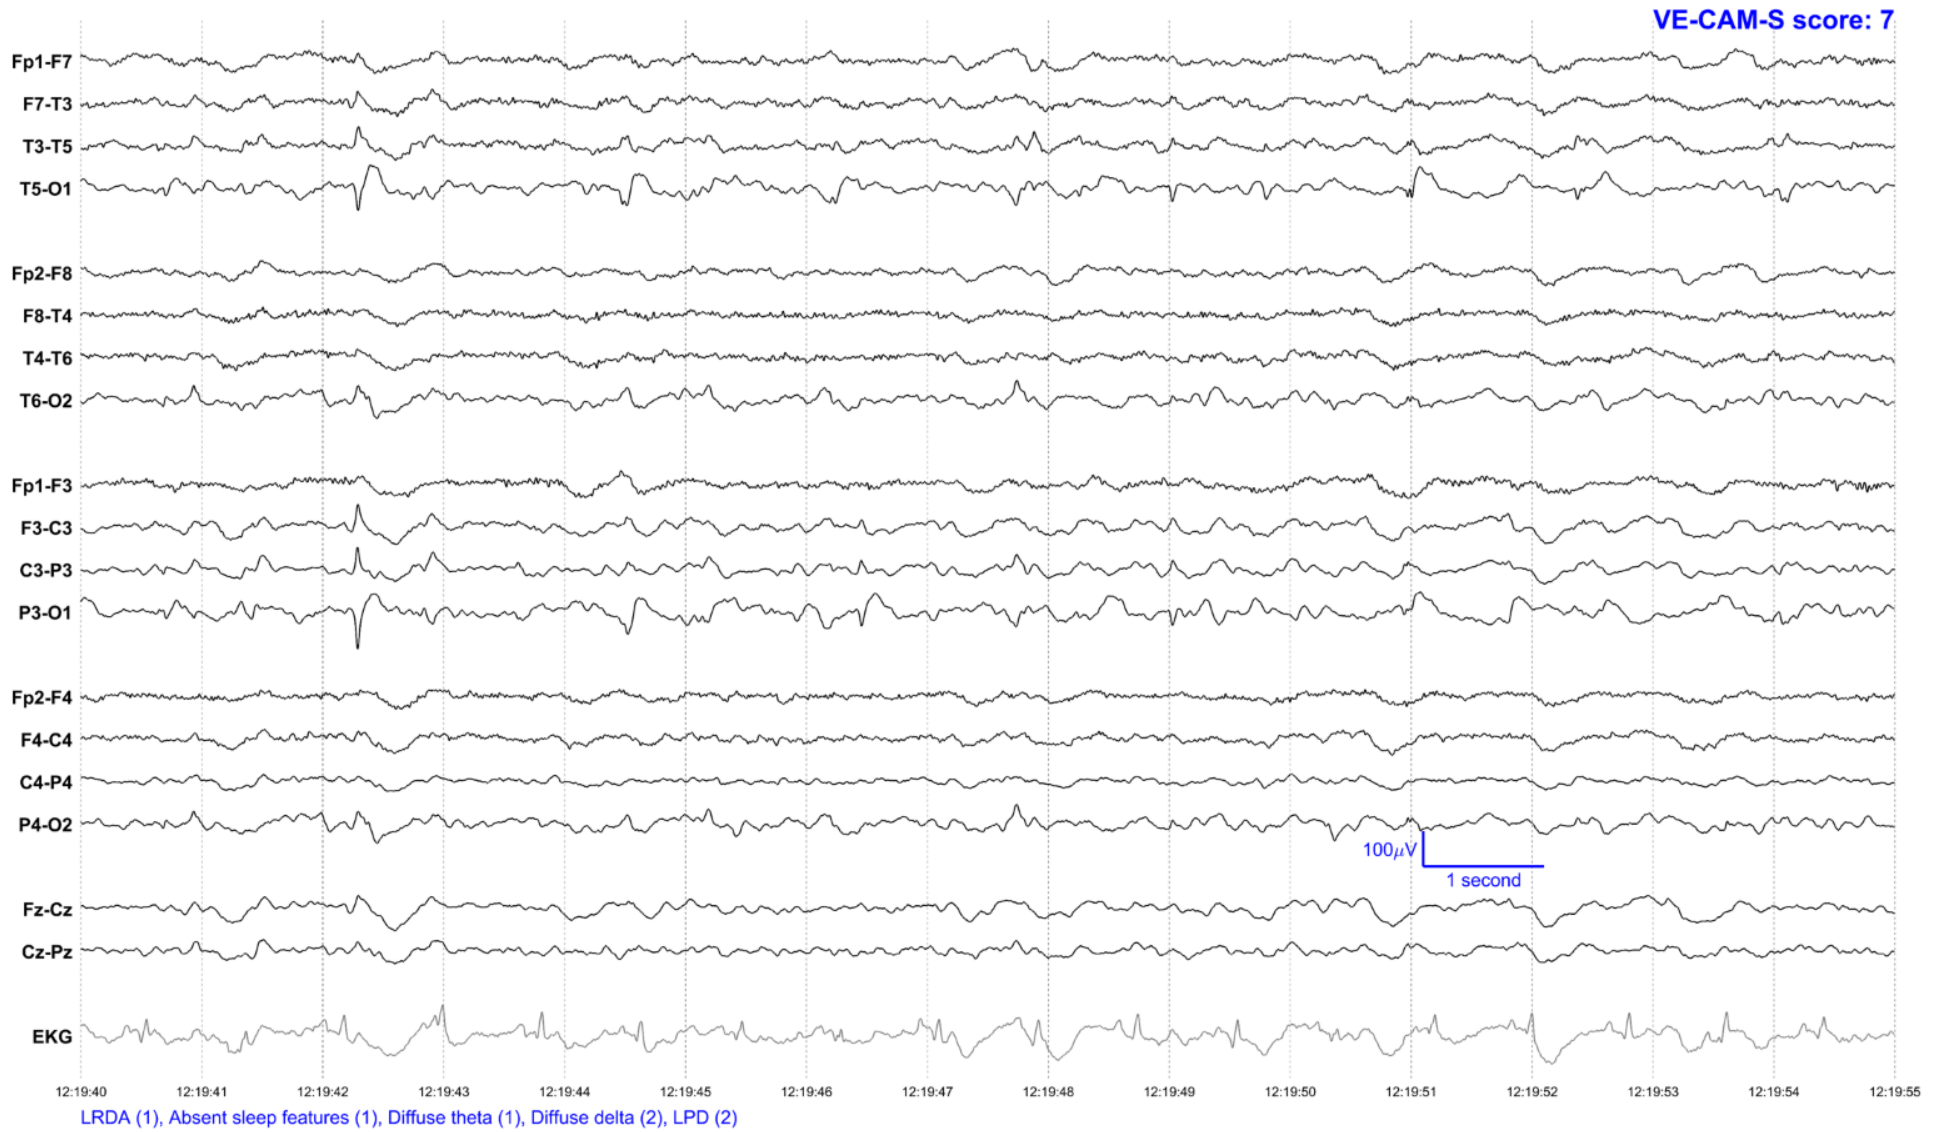

eFigure 30: Example EEG signal for 'High delirium severity'

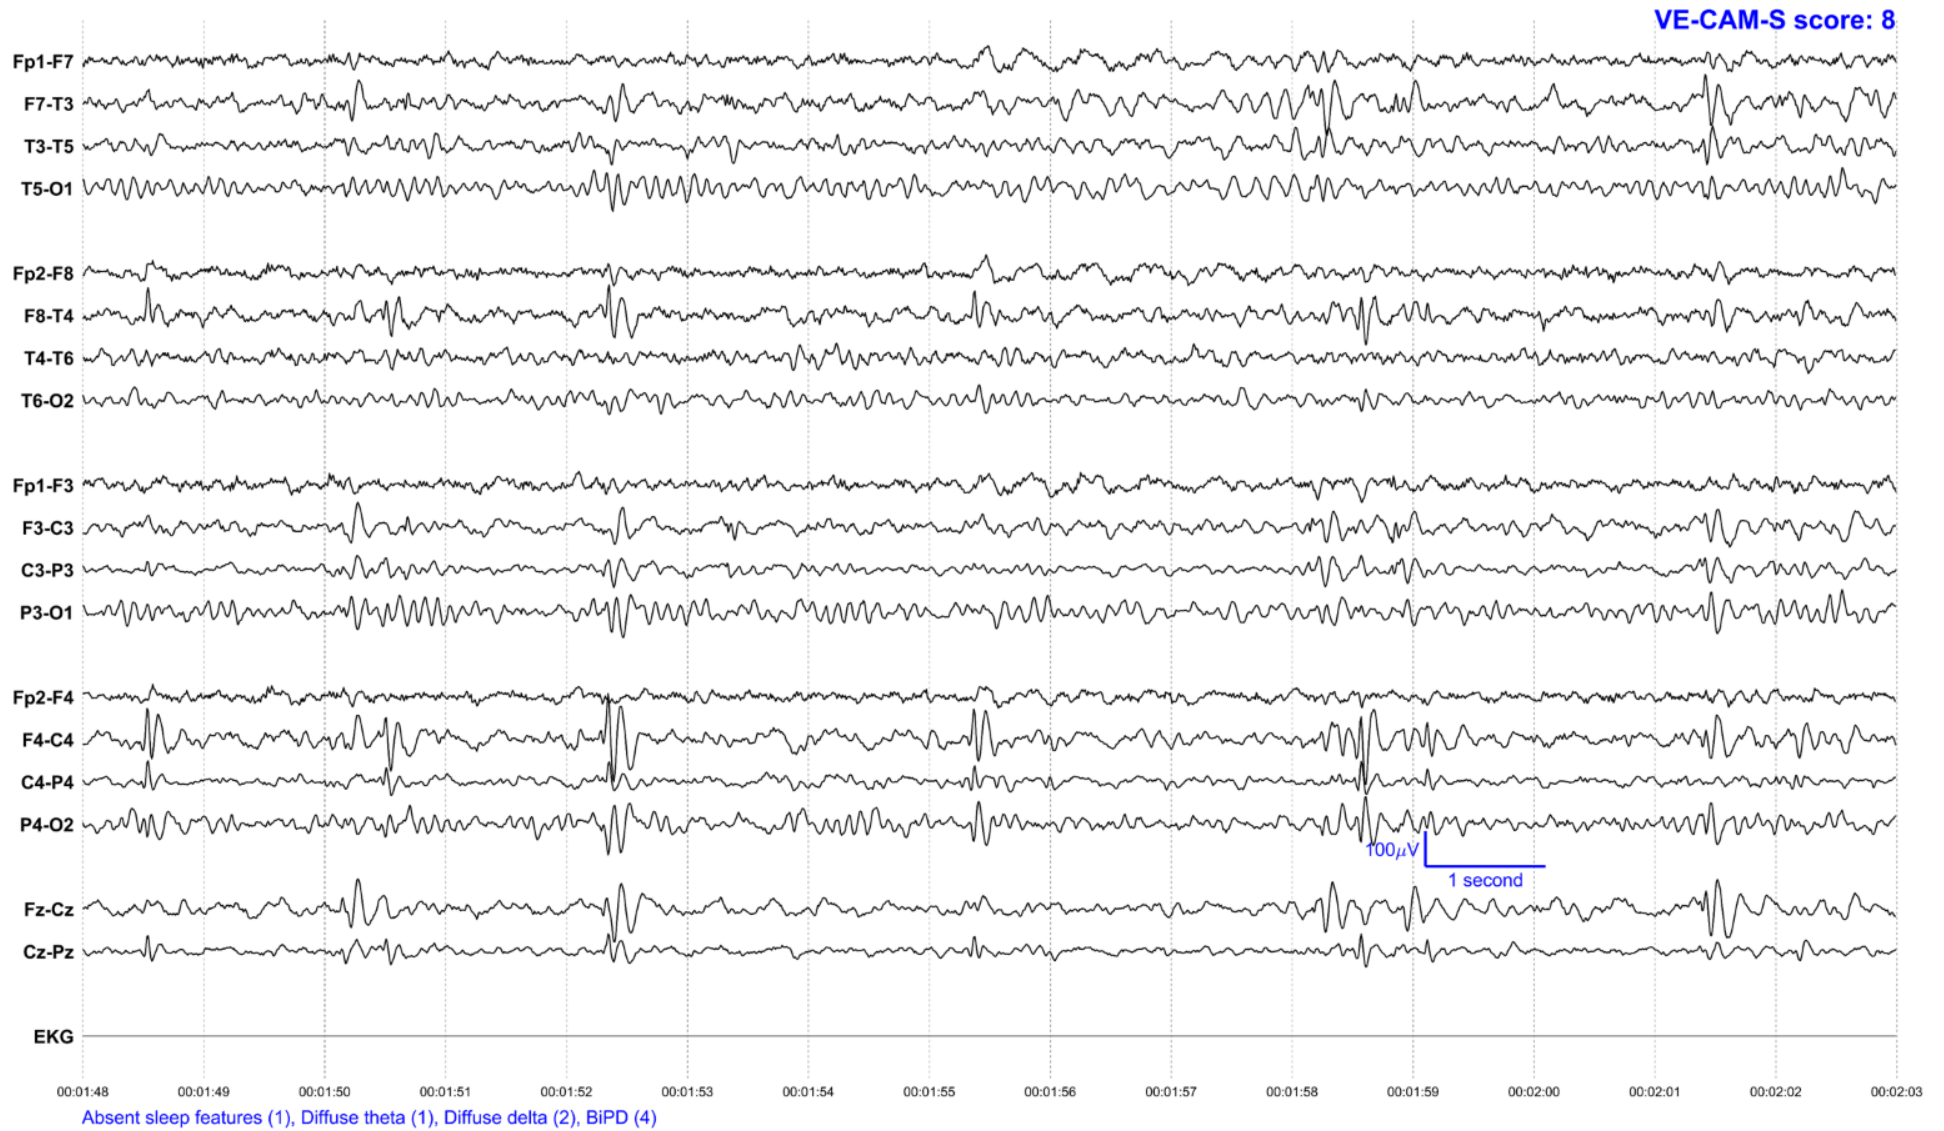

eFigure 31: Example EEG signal for 'High delirium severity'

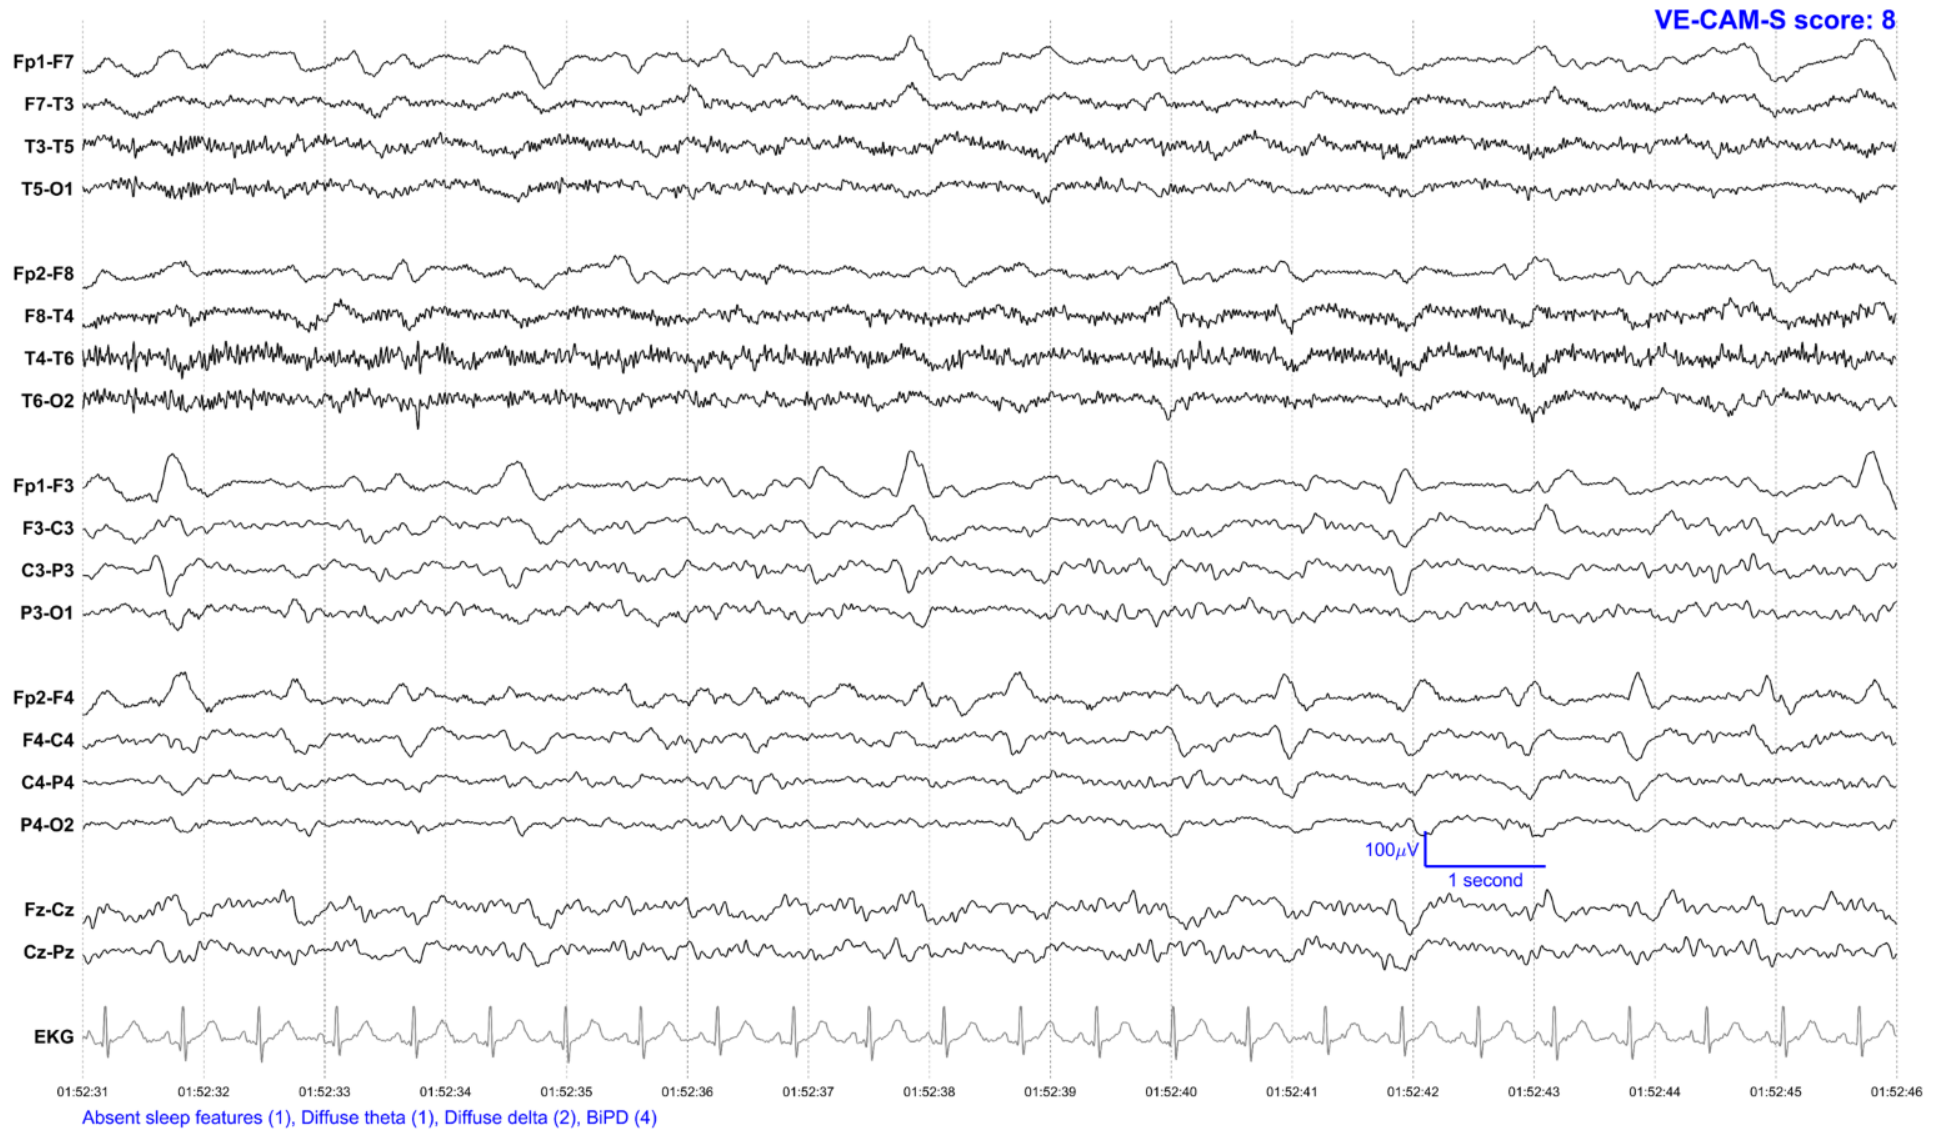

eFigure 32: Example EEG signal for 'High delirium severity'

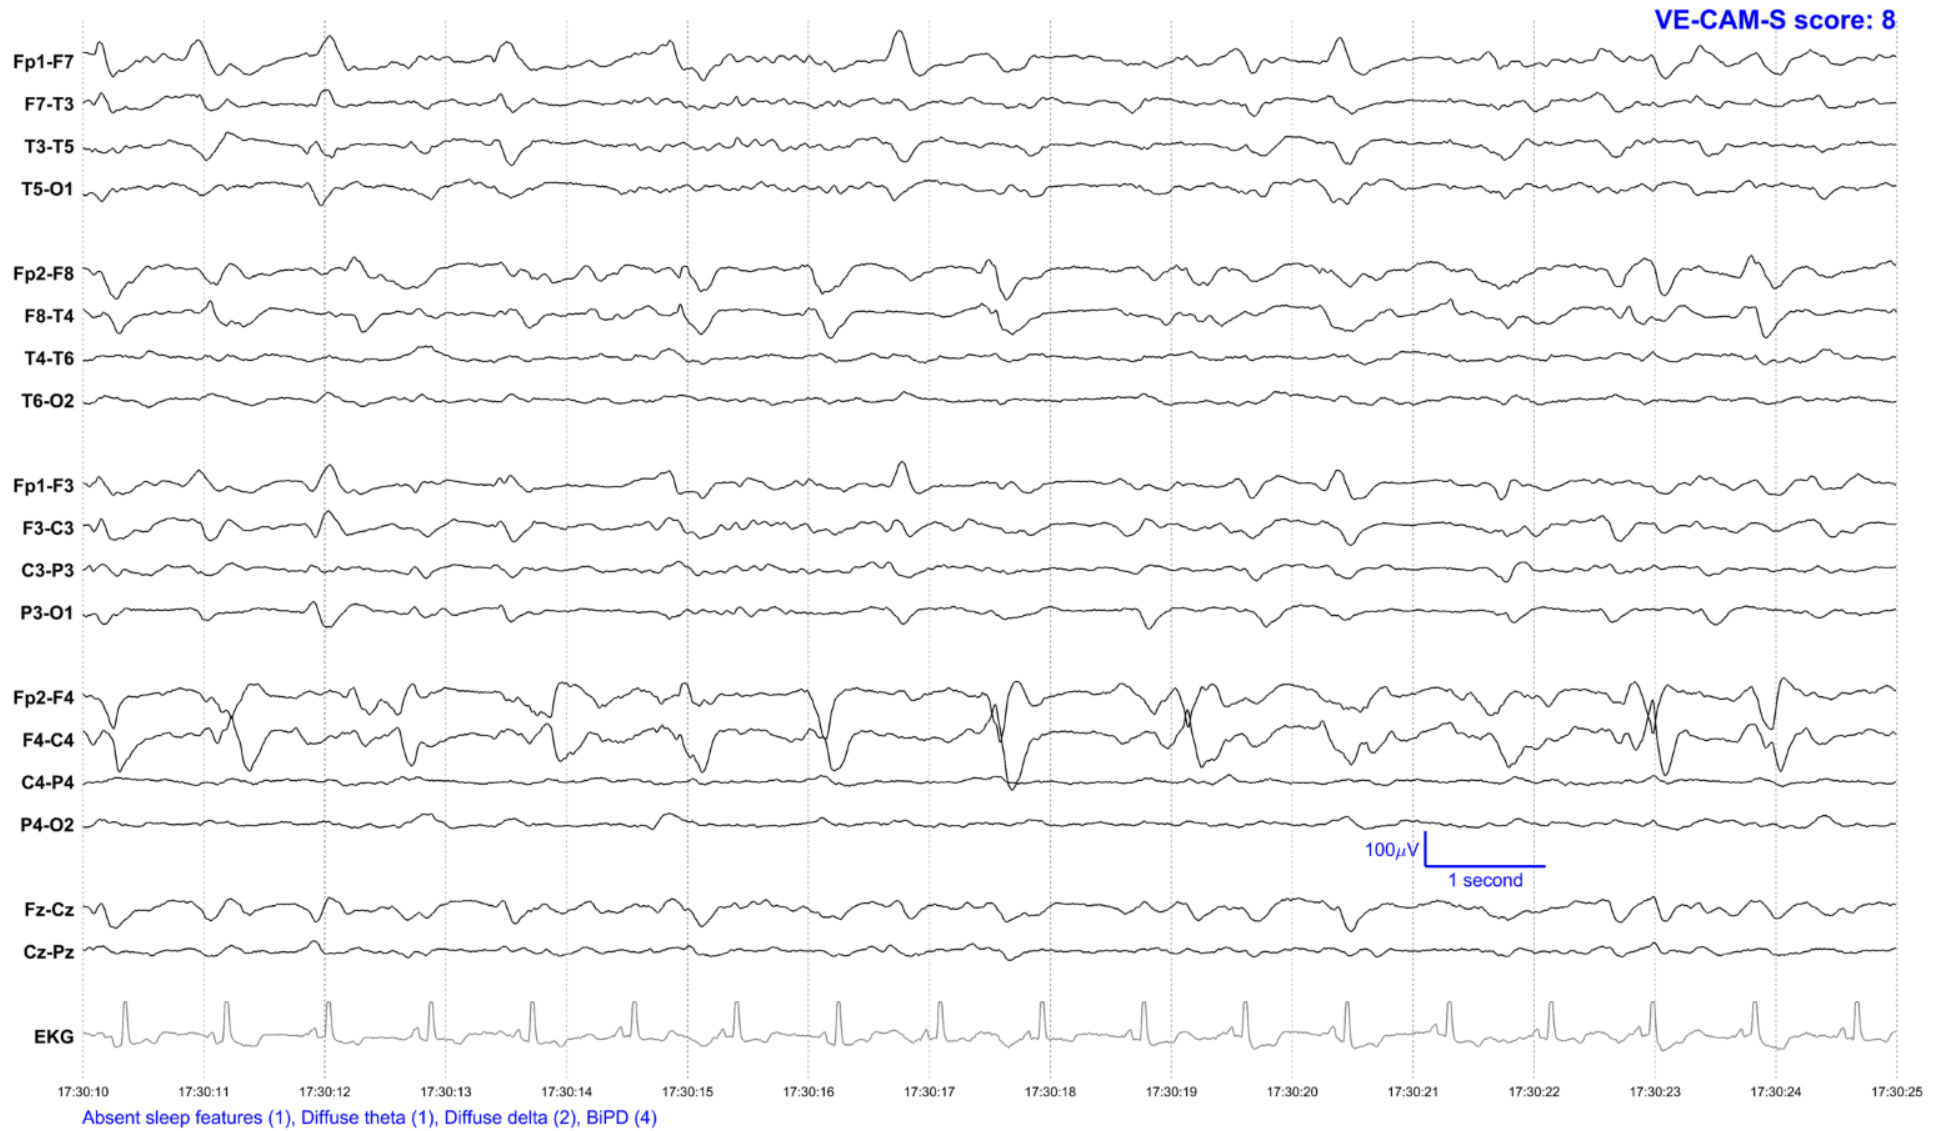



eFigure 33: Example EEG signal for 'High delirium severity'

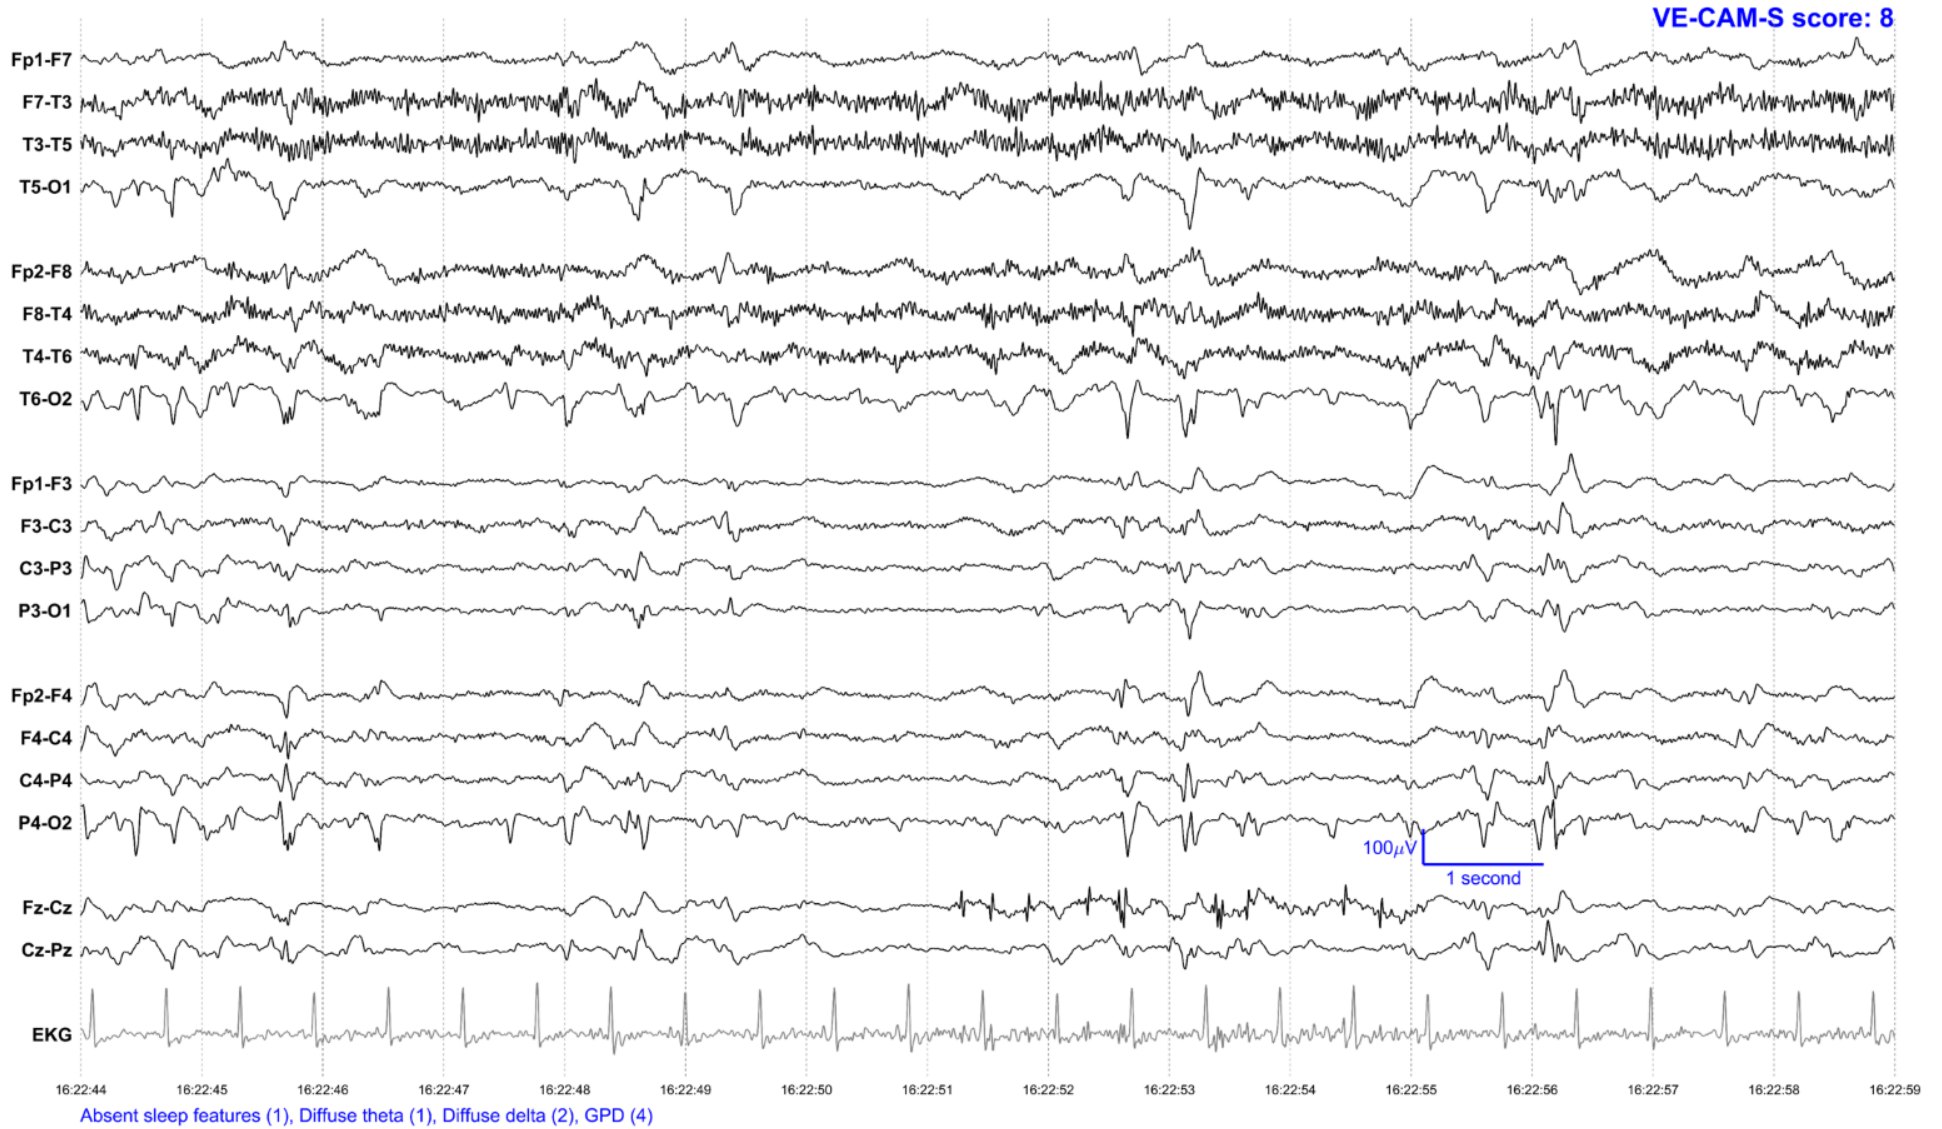

eFigure 34: Example EEG signal for 'High delirium severity'

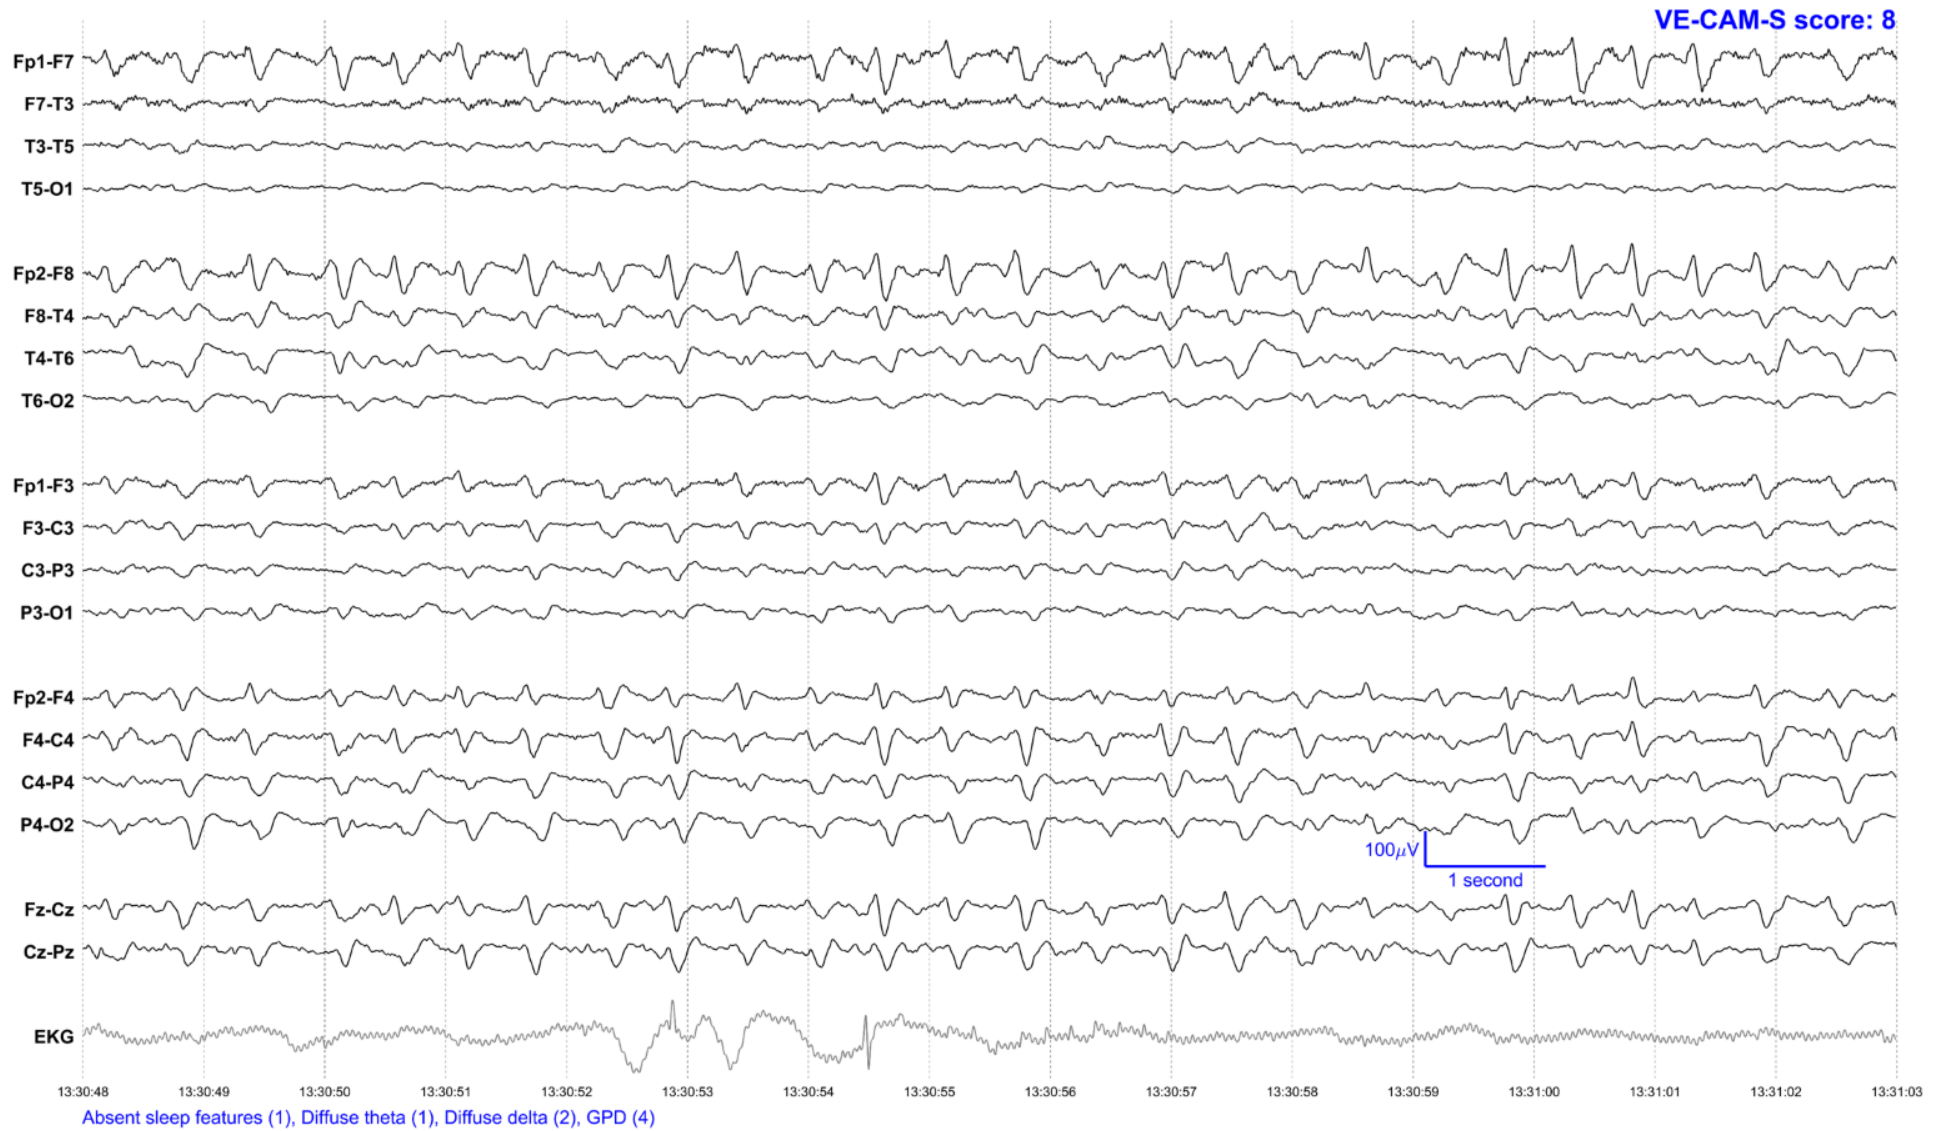

eFigure 35: Example EEG signal for 'High delirium severity'

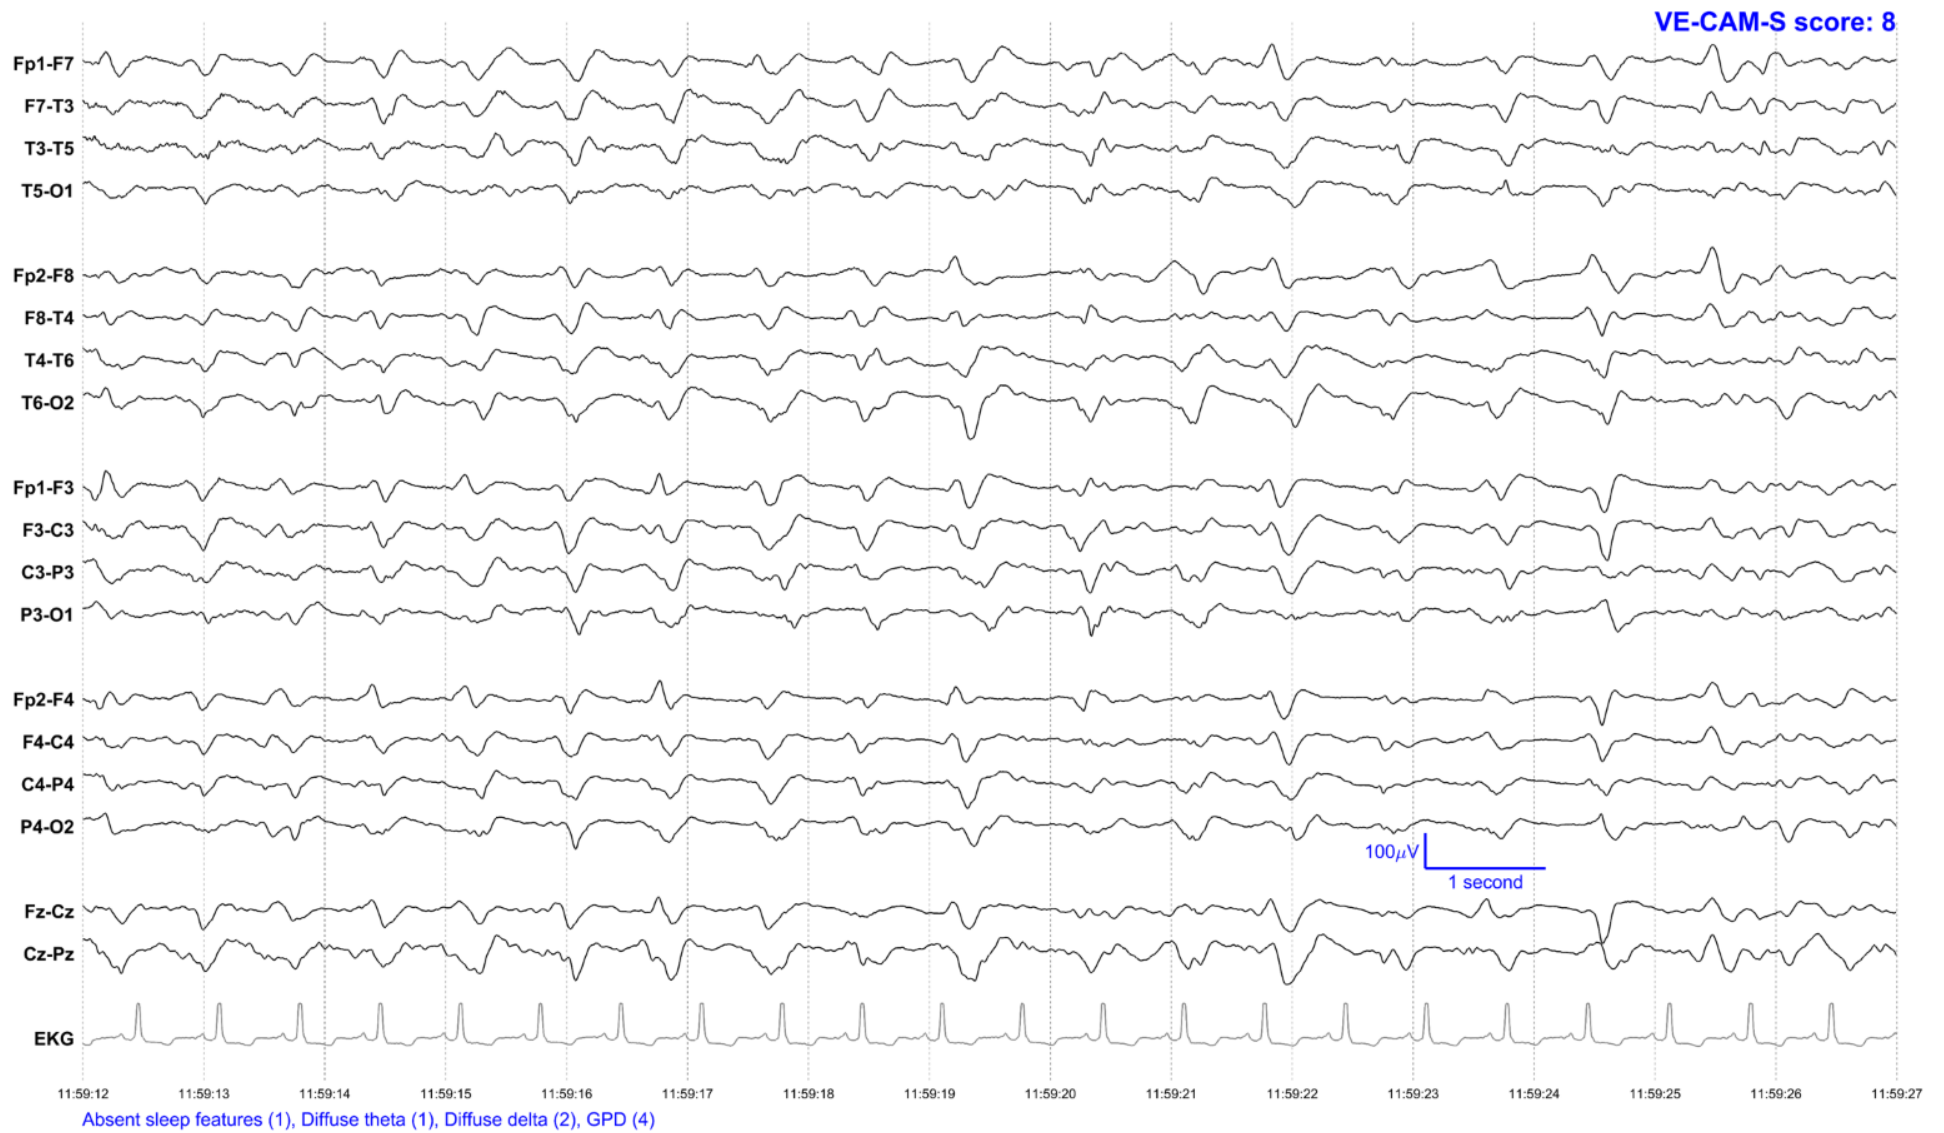

eFigure 36: Example EEG signal for 'High delirium severity'

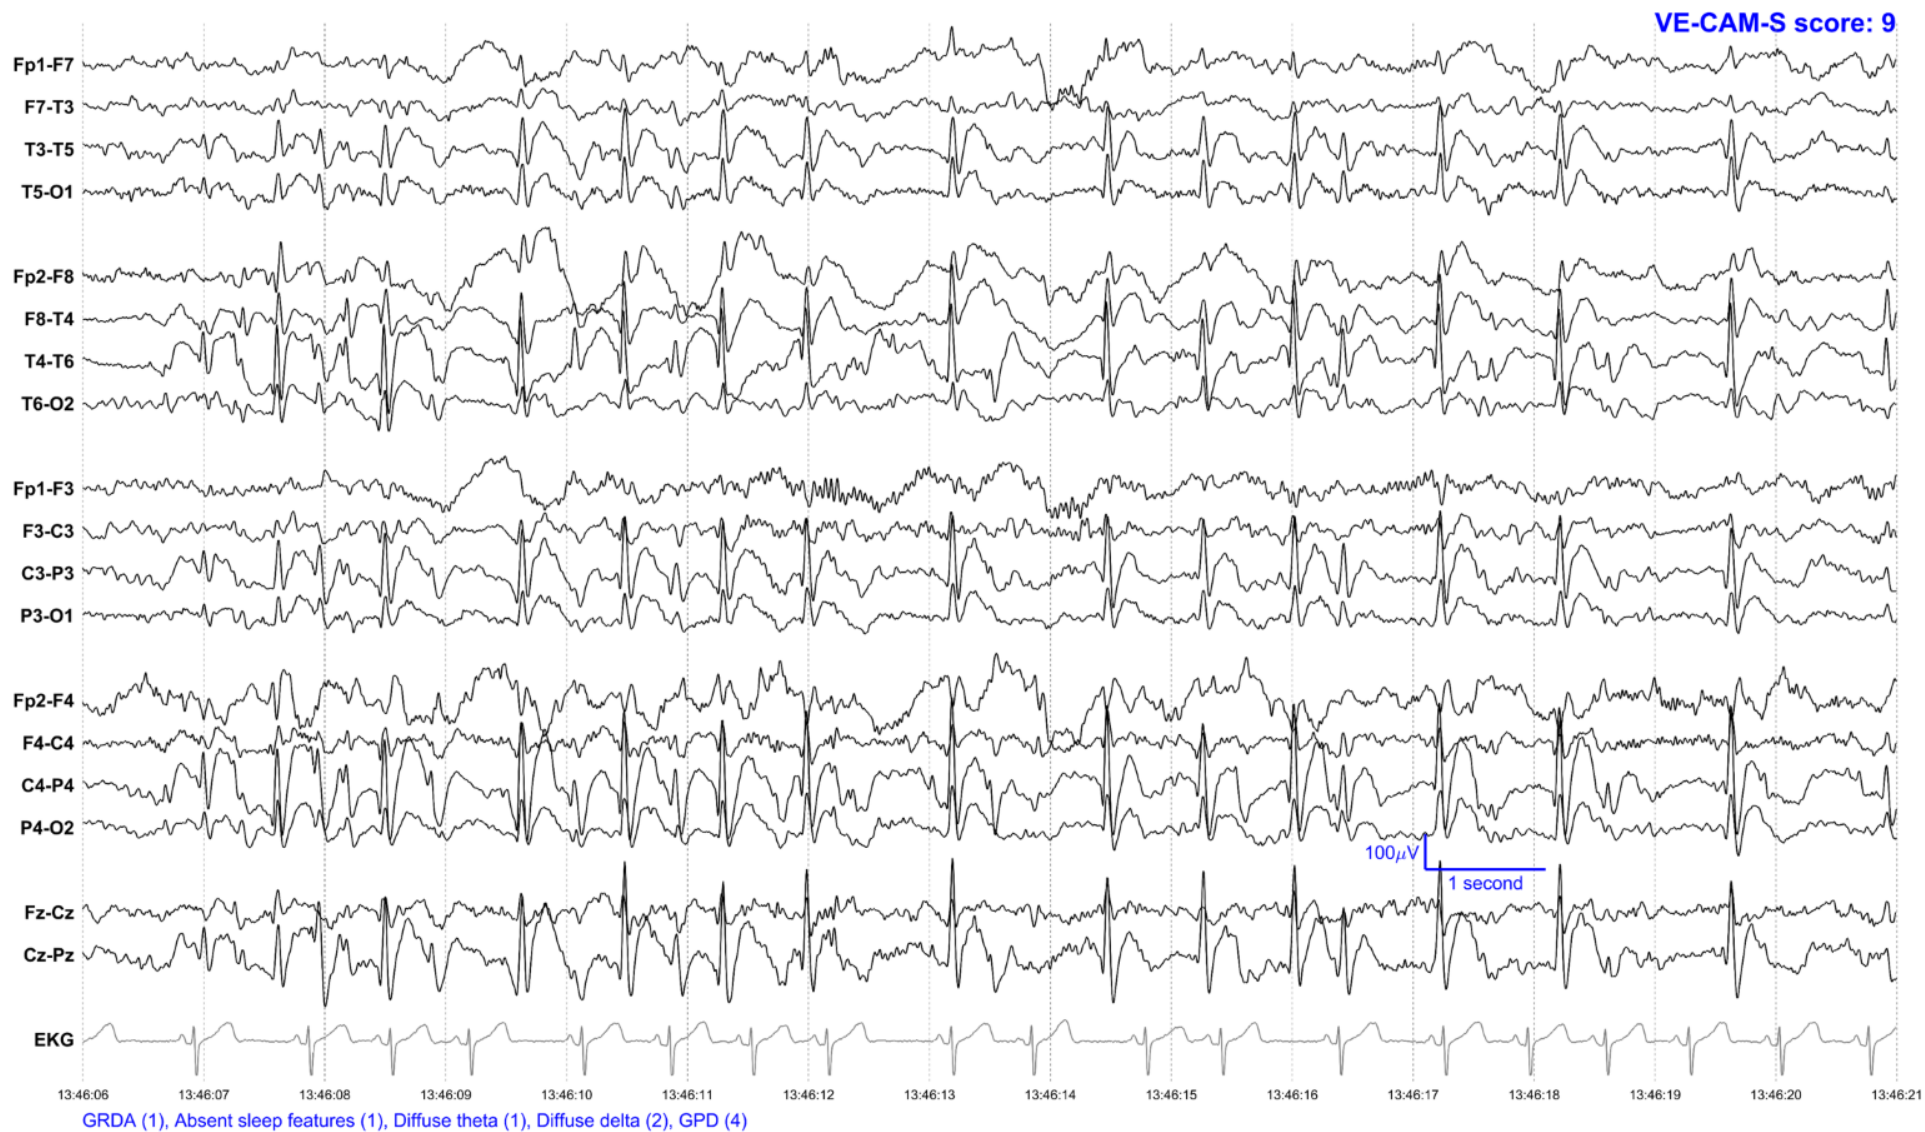

eFigure 37: Example EEG signal for 'High delirium severity'

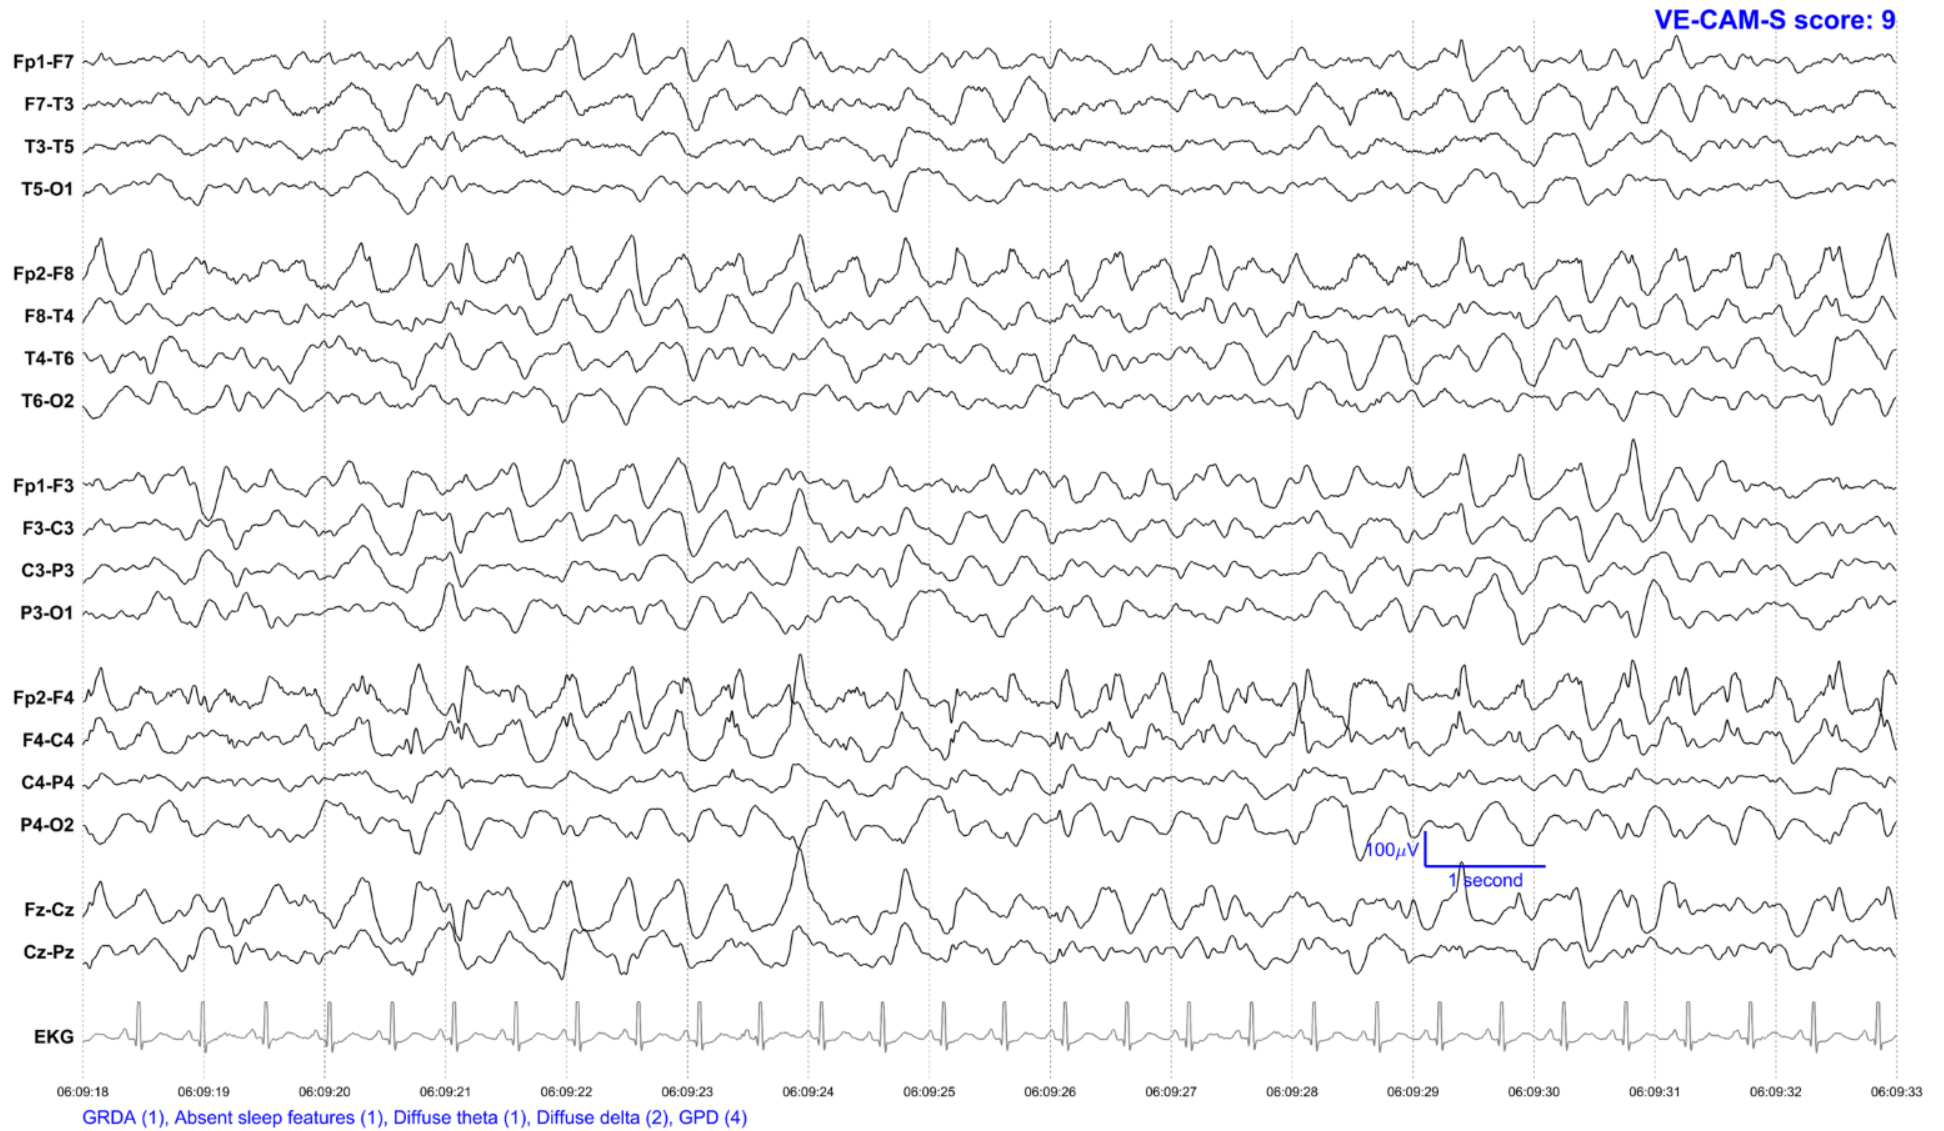

eFigure 38: Example EEG signal for 'High delirium severity'

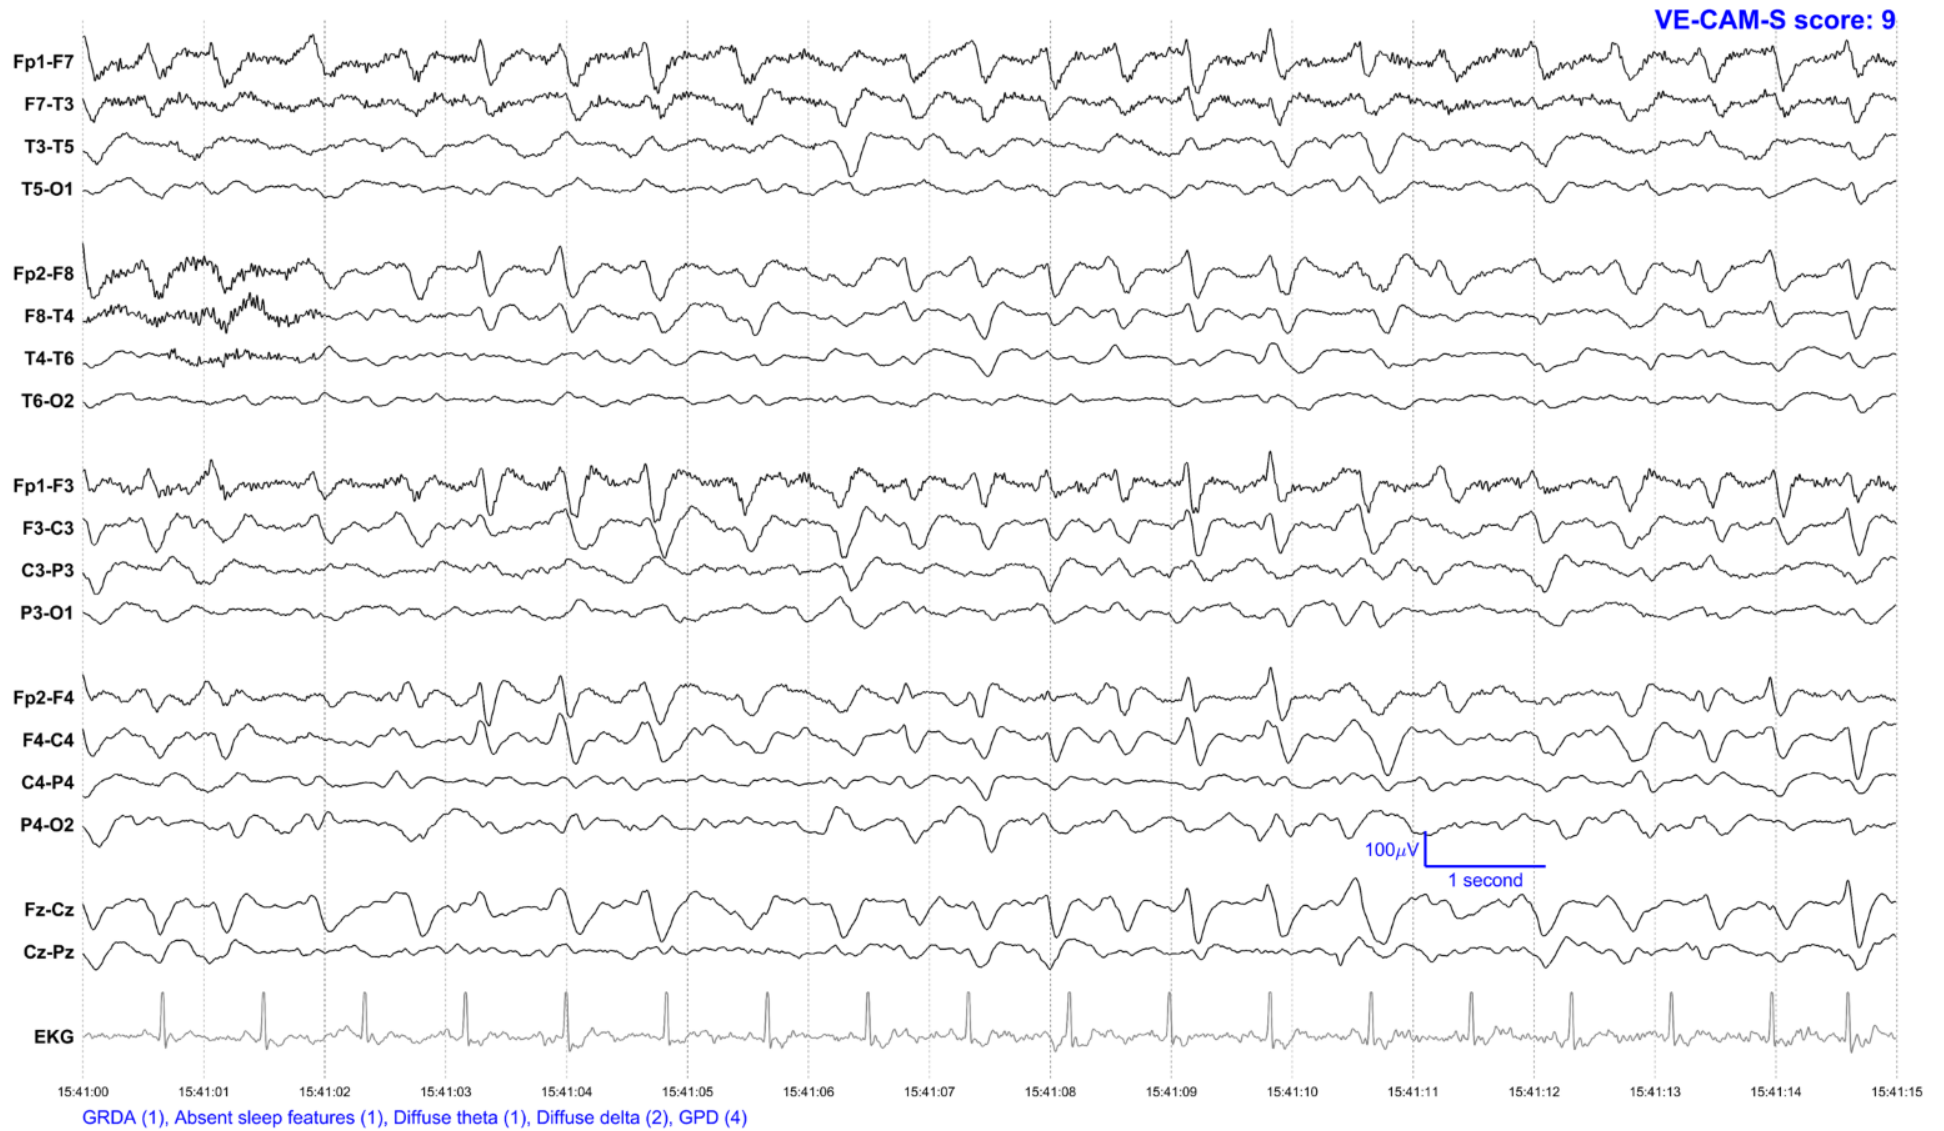

eFigure 39: Example EEG signal for 'High delirium severity'

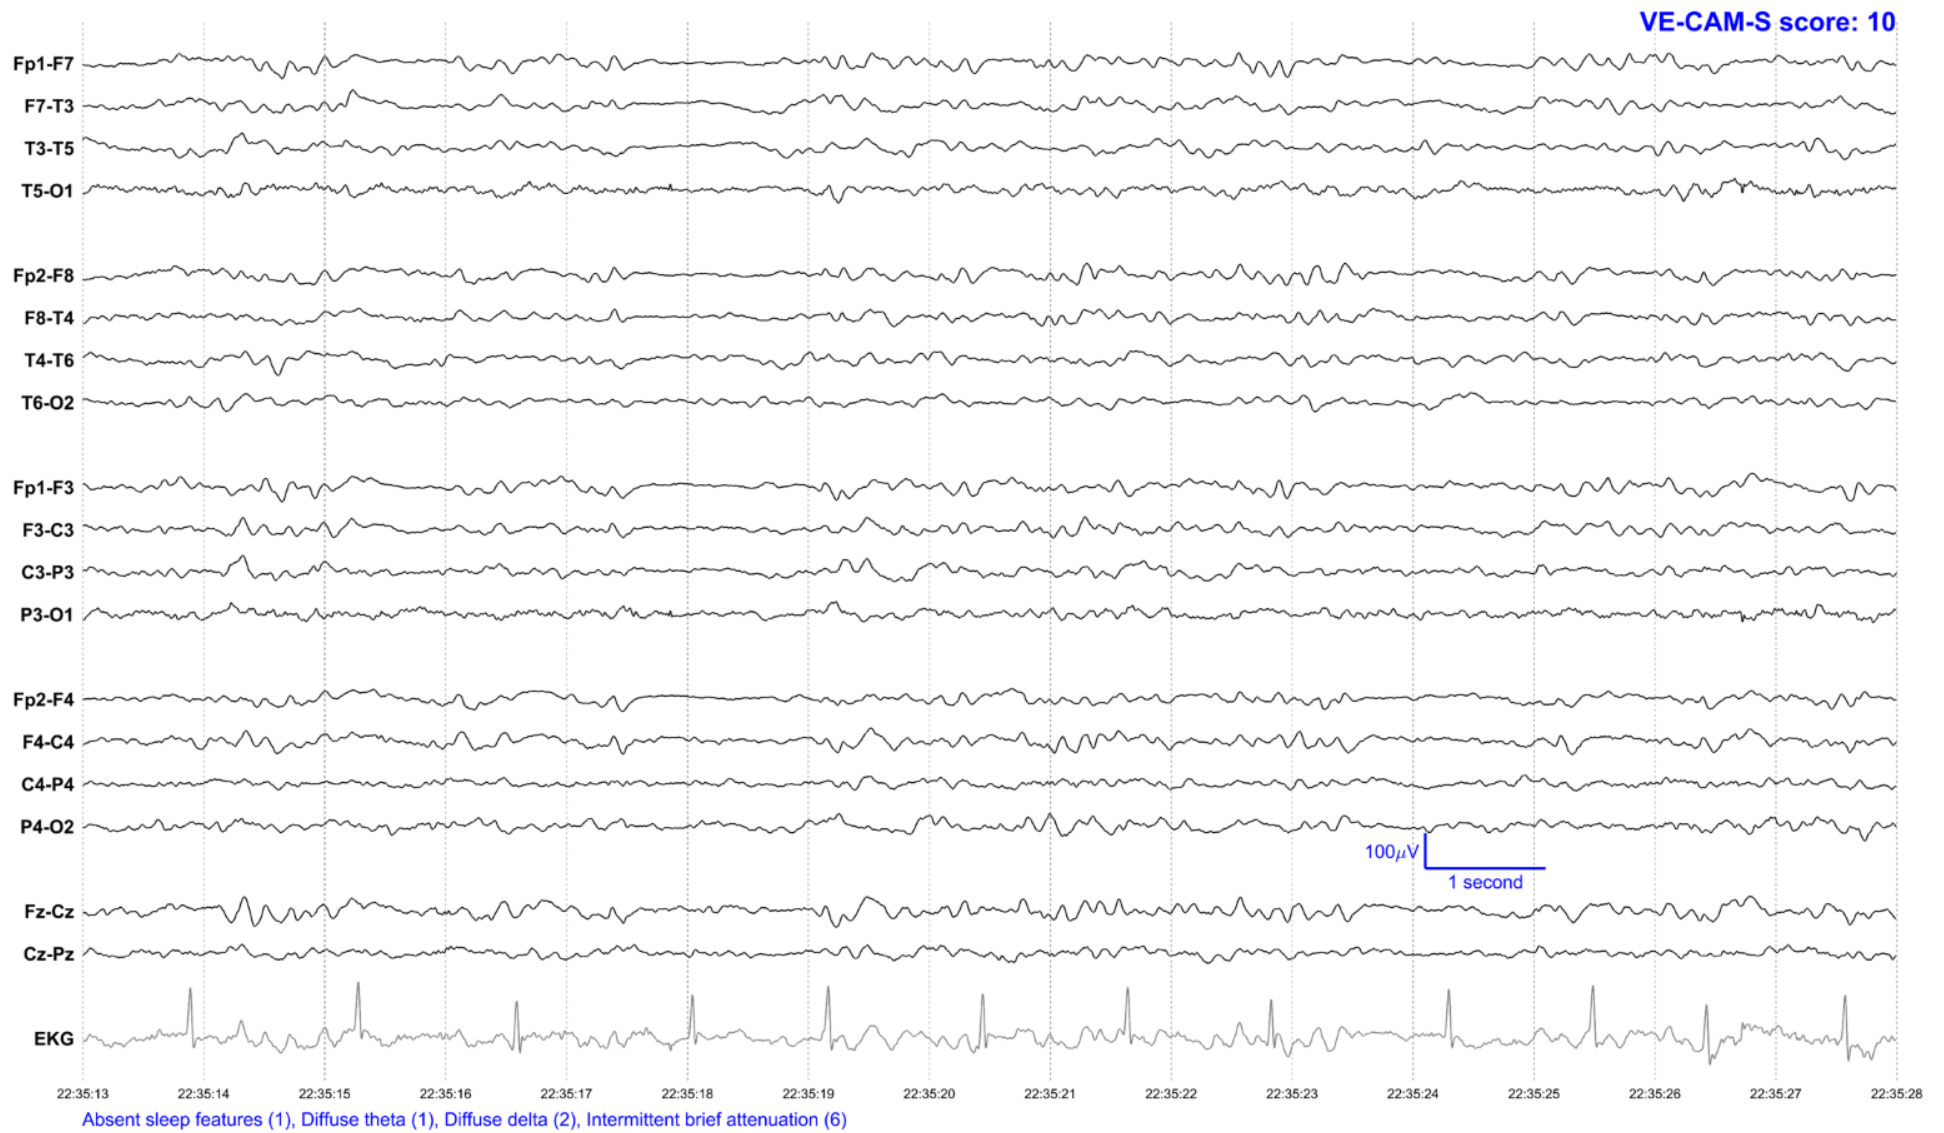

eFigure 40: Example EEG signal for 'High delirium severity'

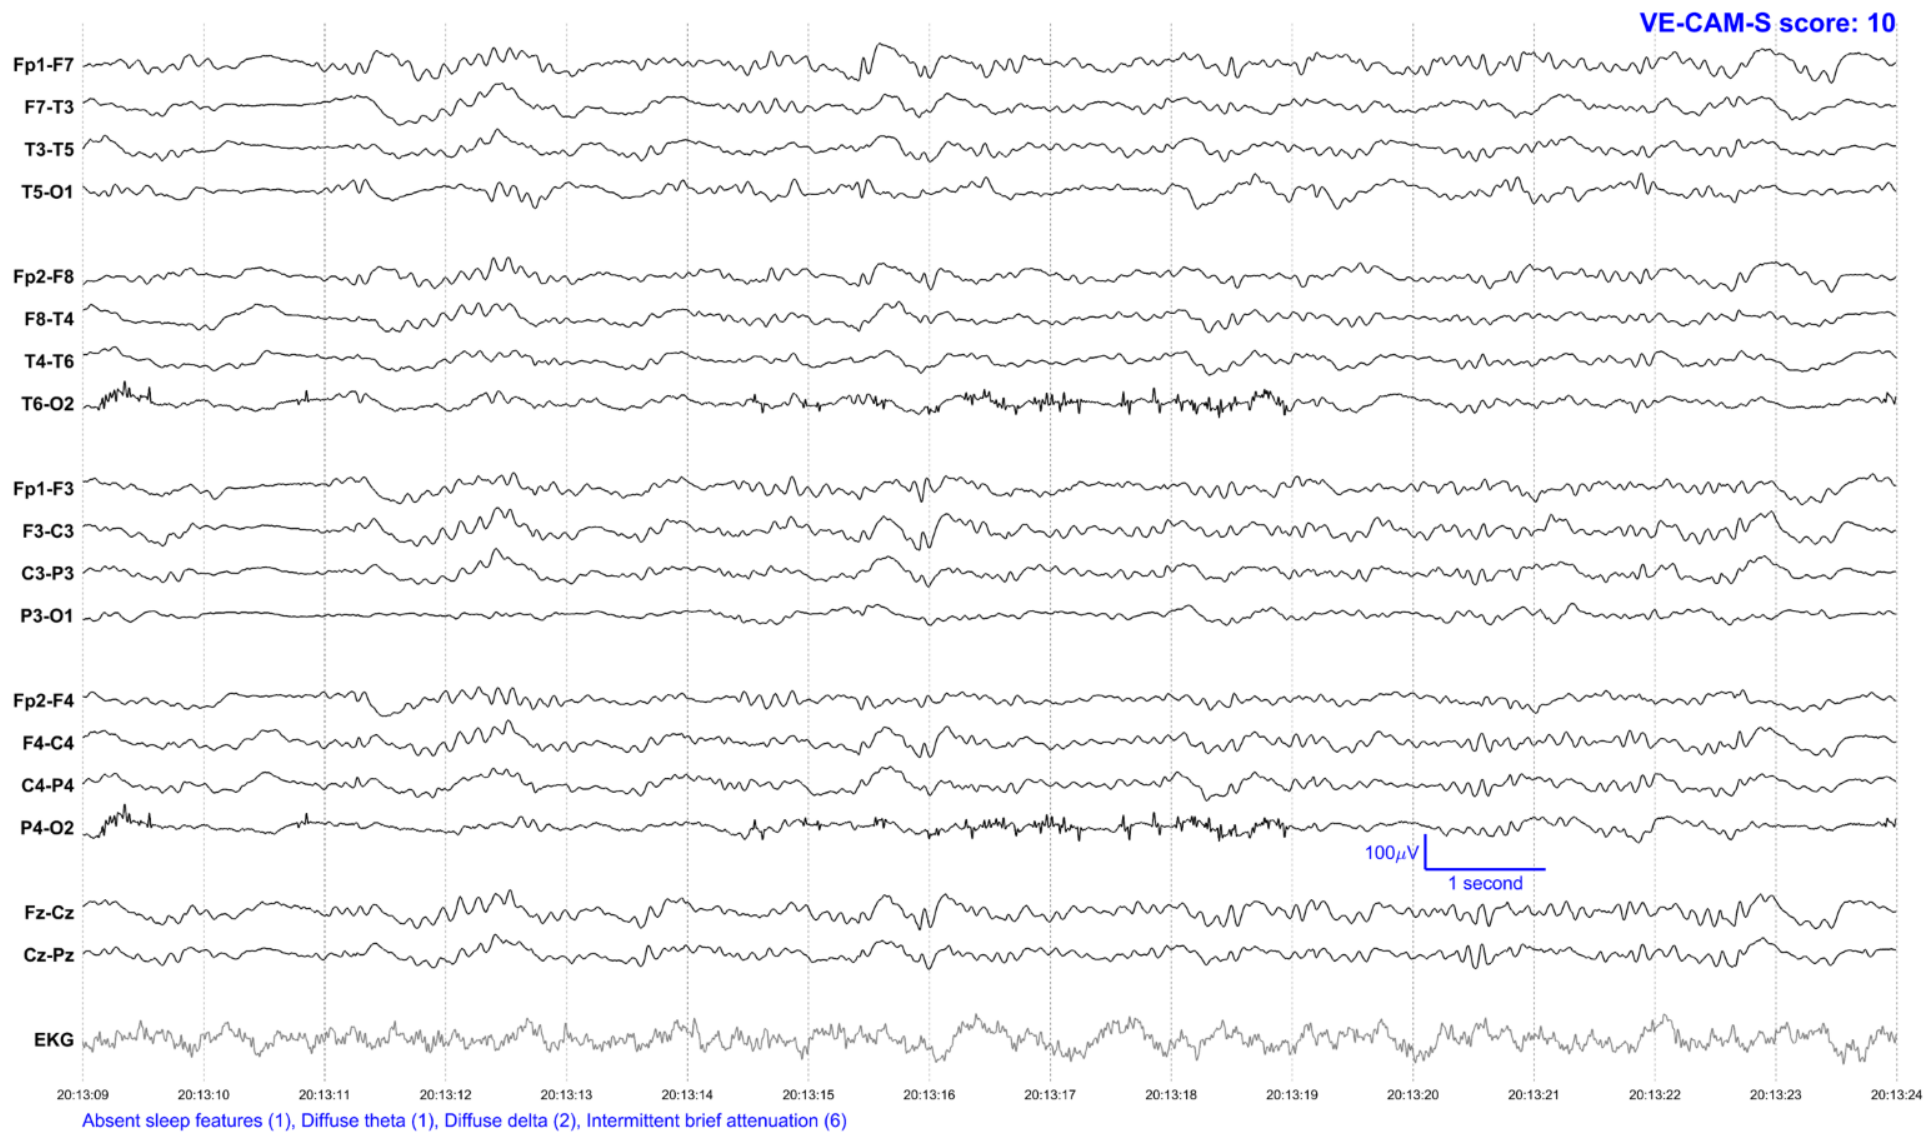



eFigure 41: Example EEG signal for 'High delirium severity'

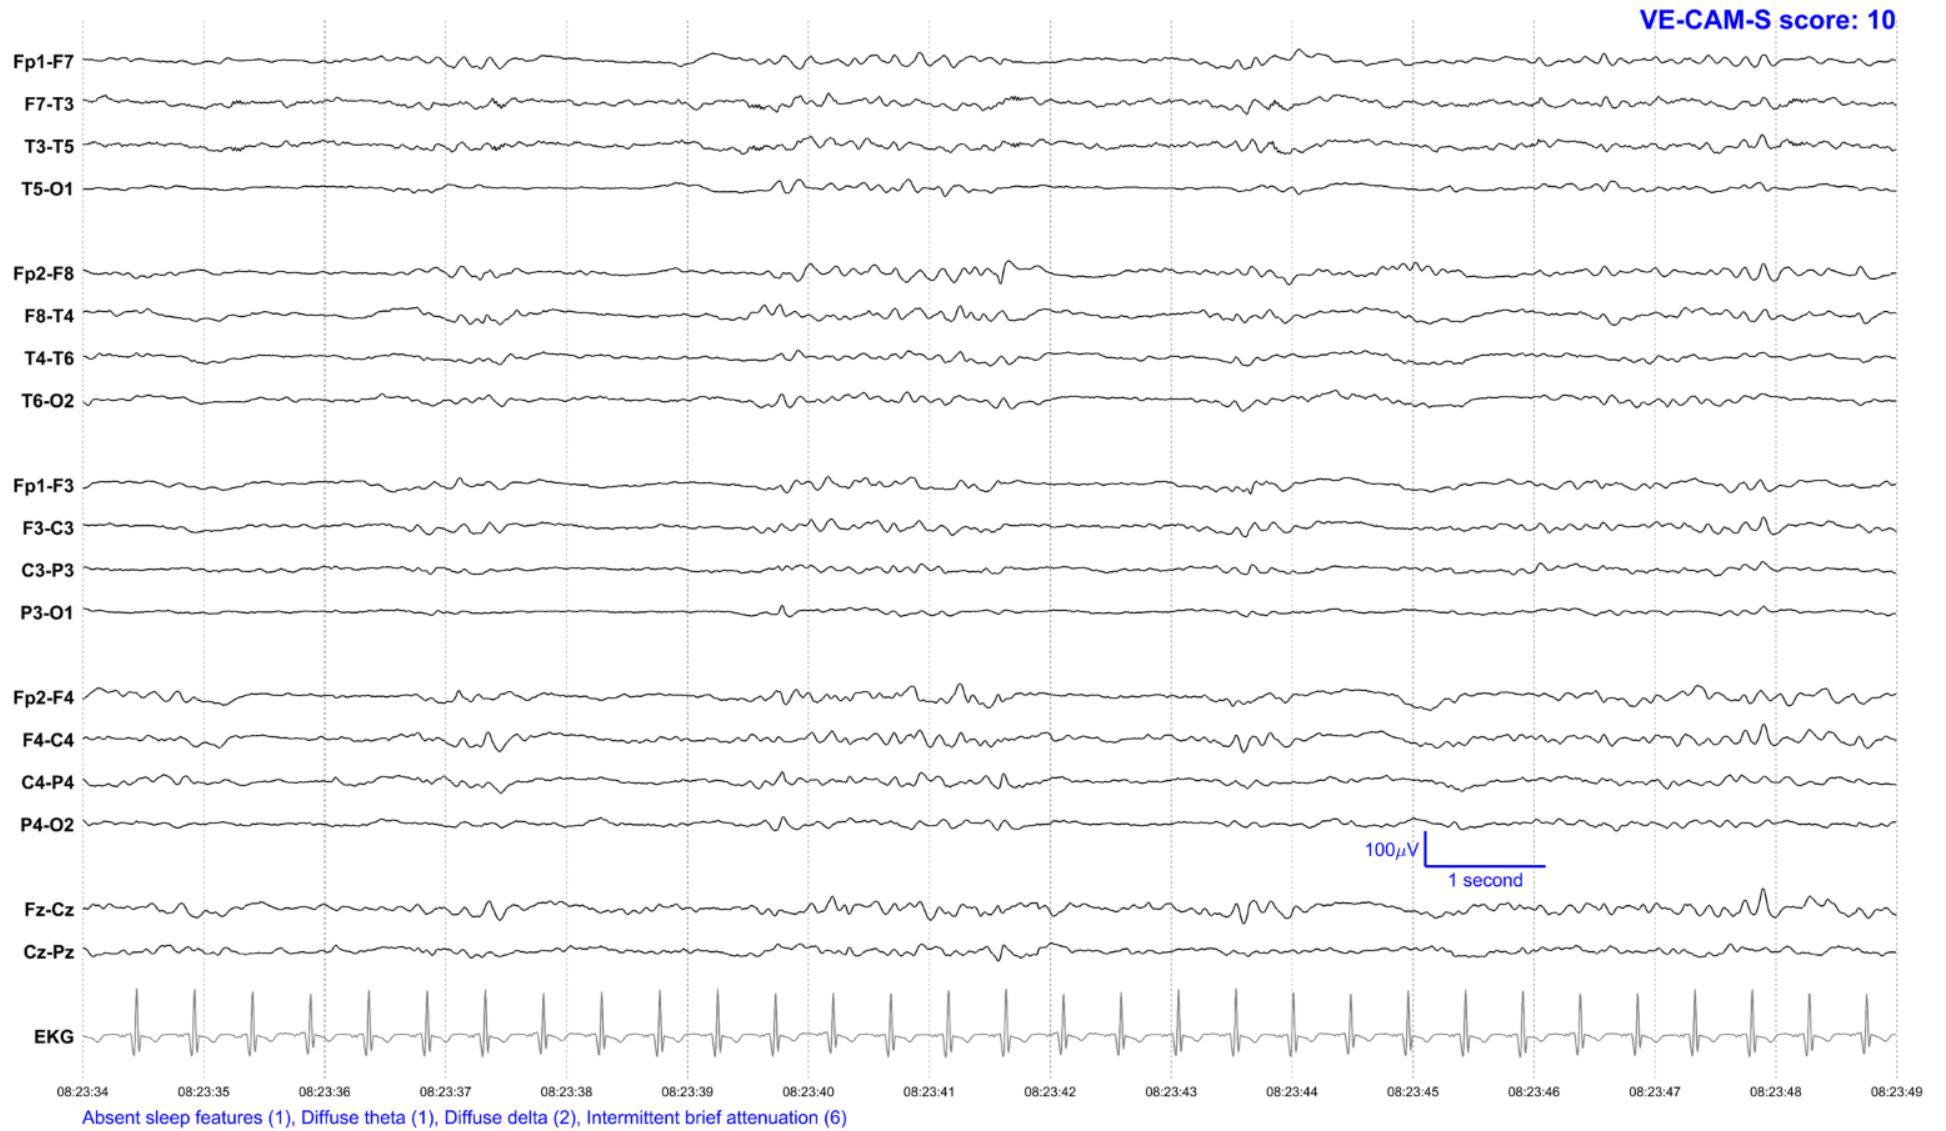

eFigure 42: Example EEG signal for 'High delirium severity'

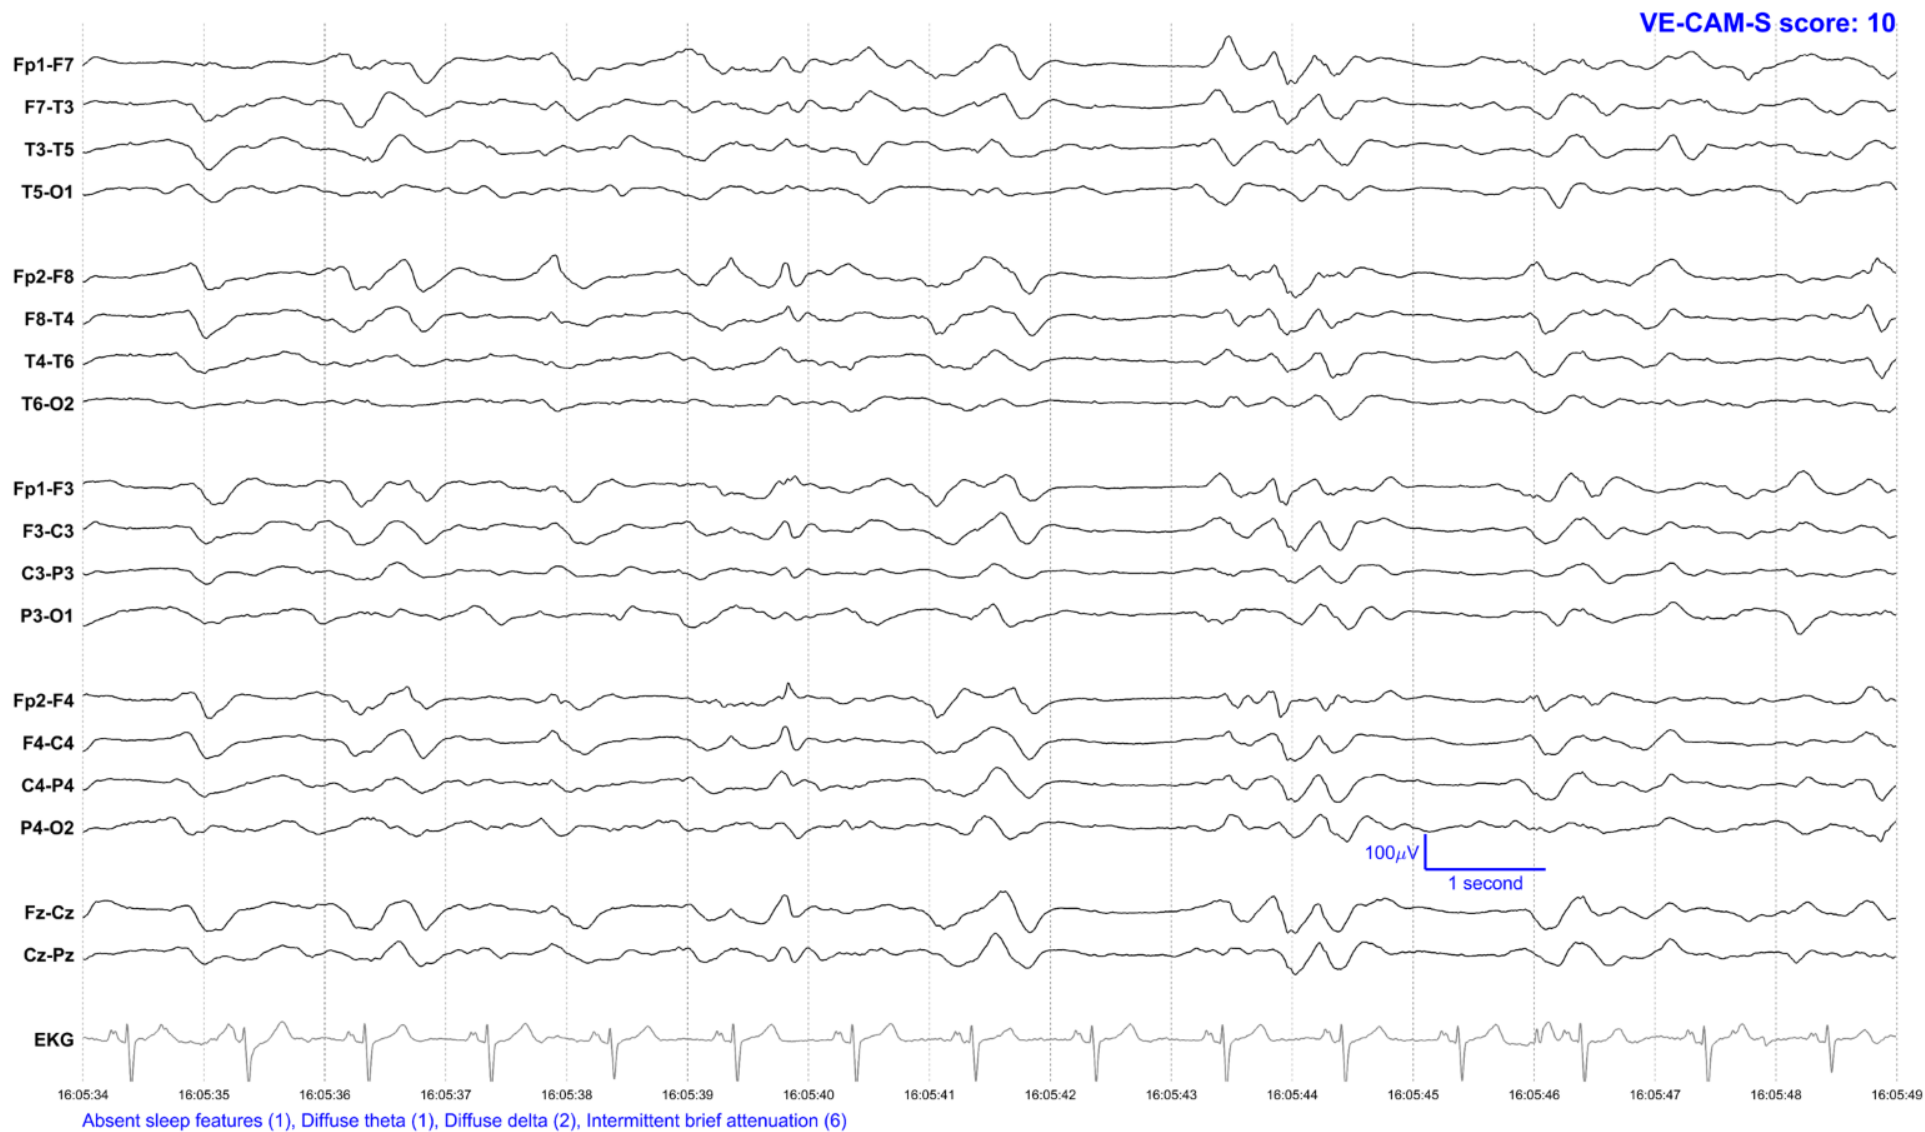

eFigure 43: Example EEG signal for 'High delirium severity'

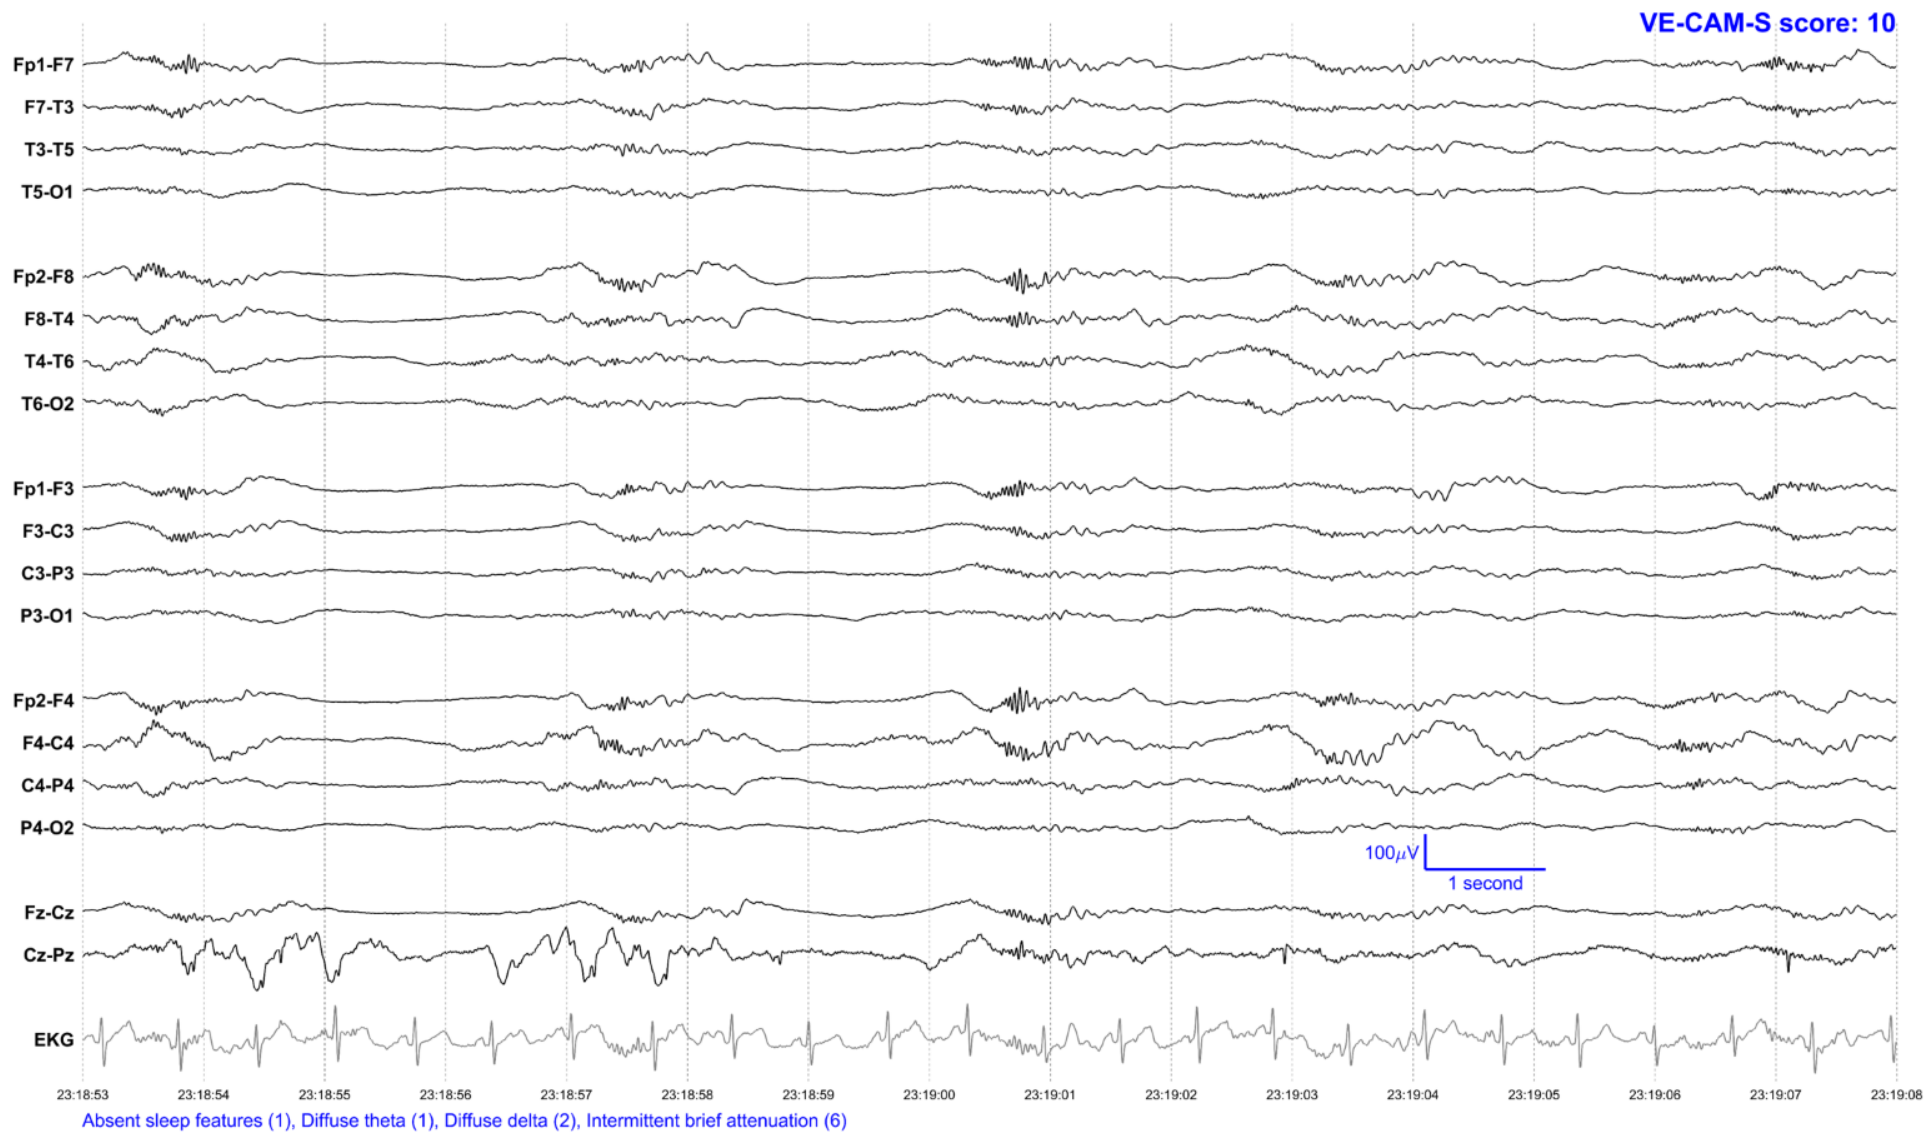

eFigure 44: Example EEG signal for 'High delirium severity'

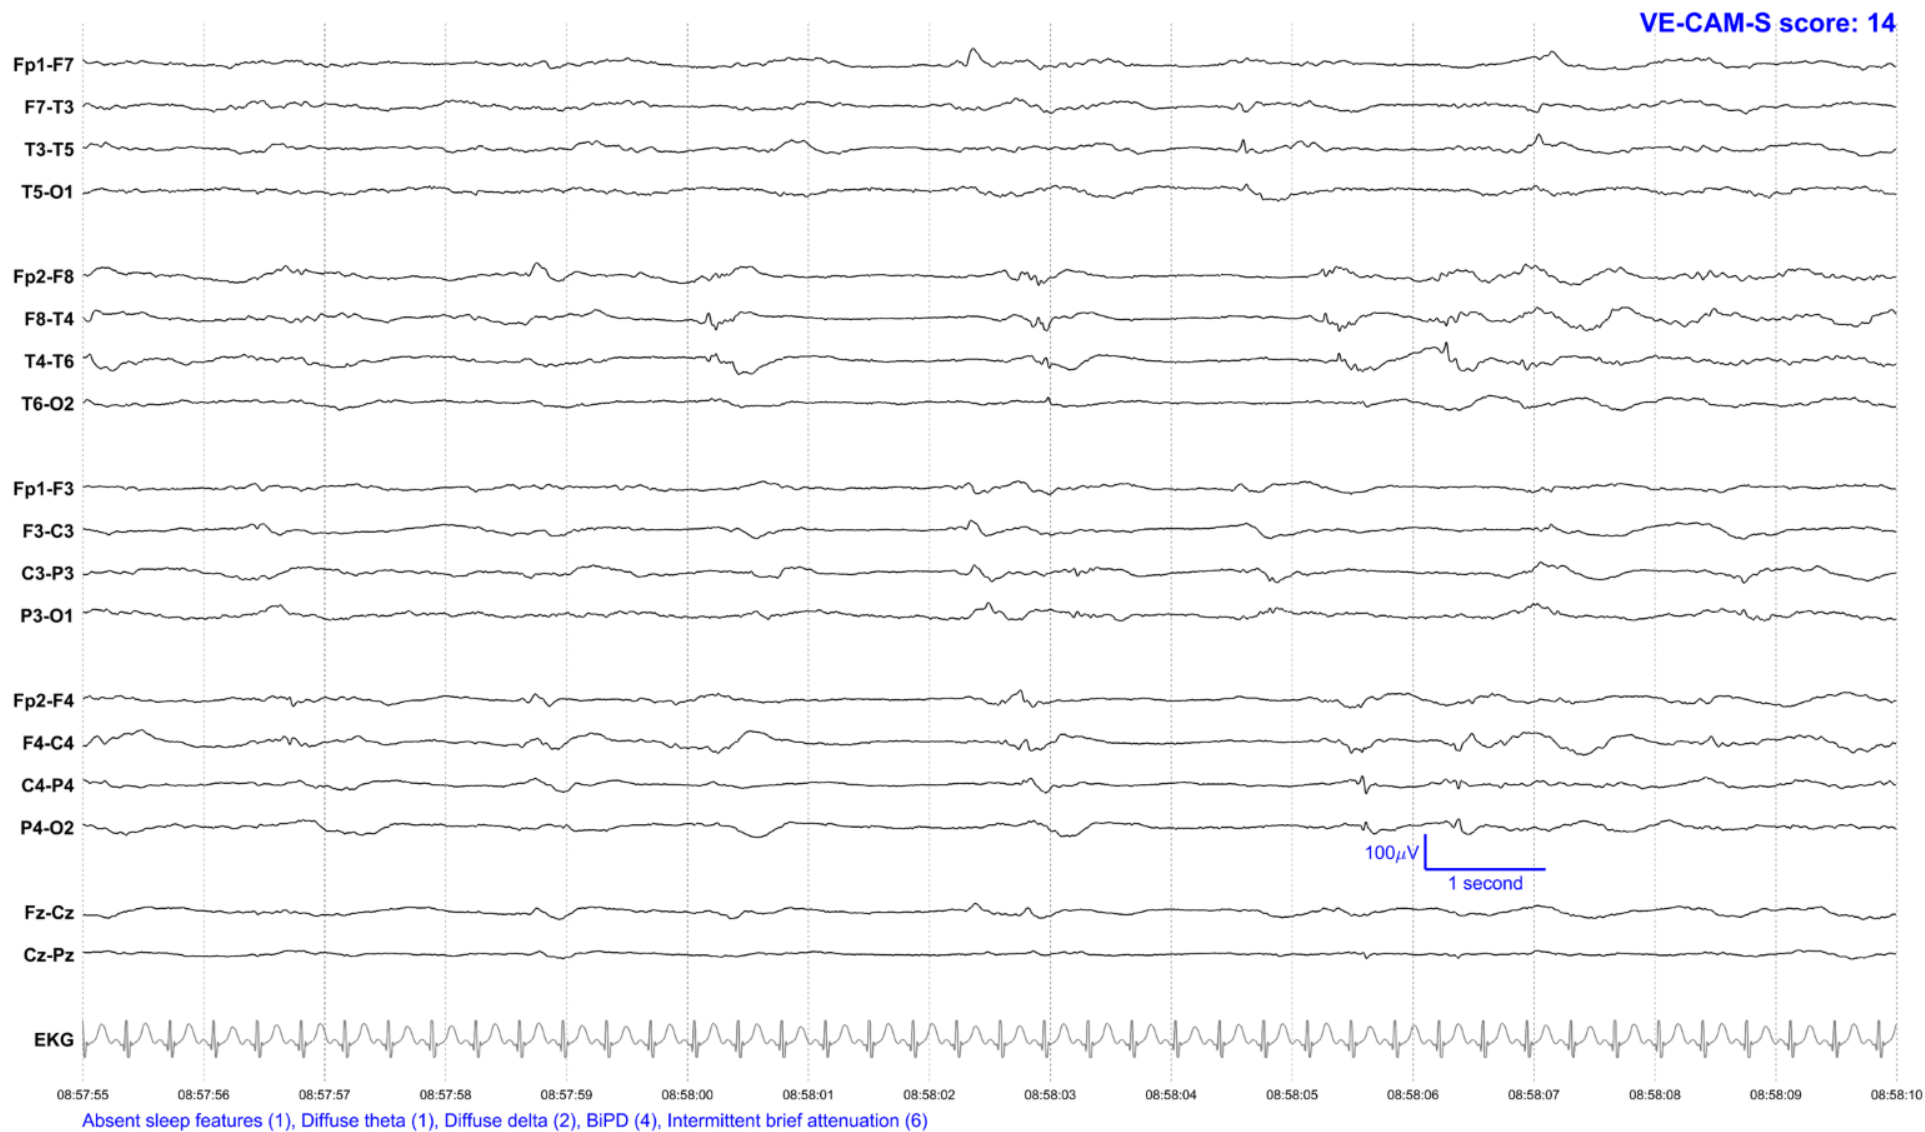

eFigure 45: Example EEG signal for 'High delirium severity'

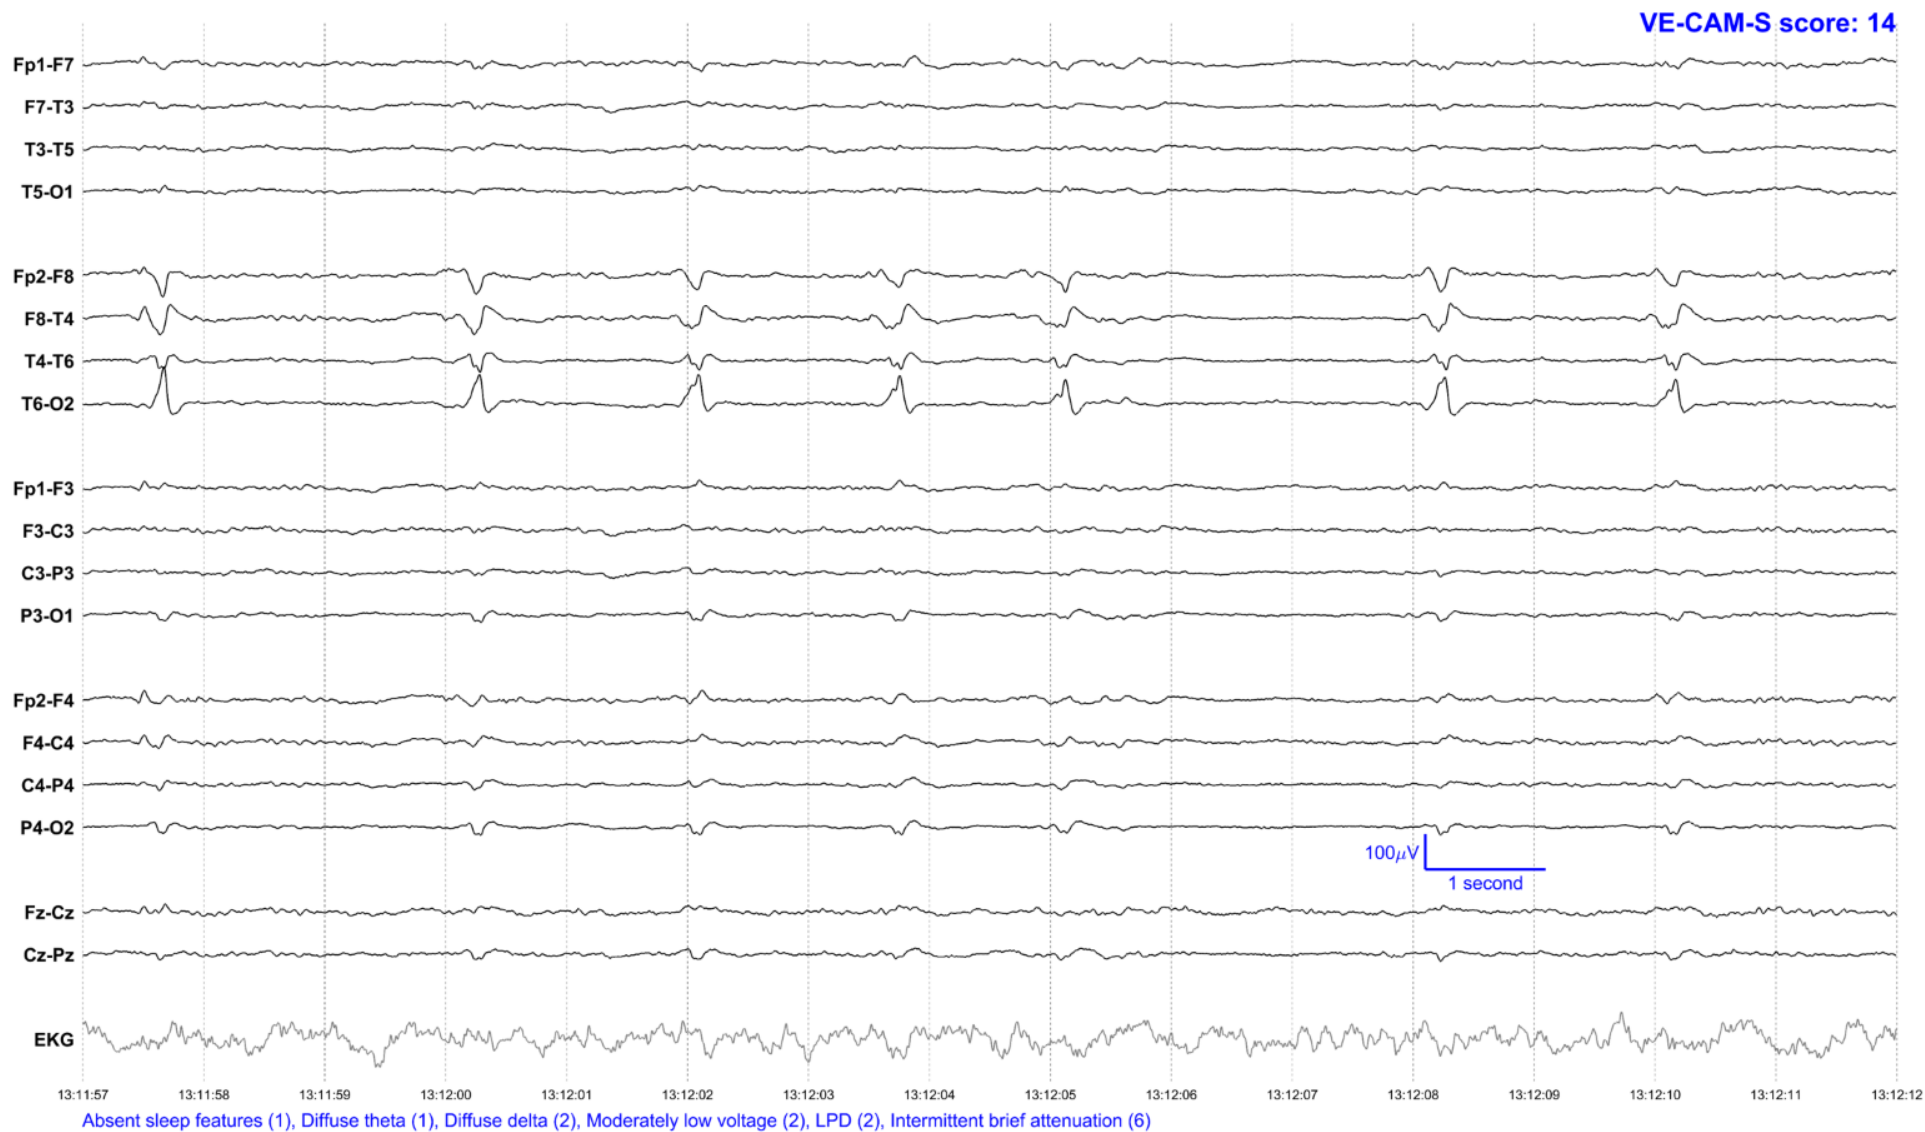

eFigure 46: Example EEG signal for 'High delirium severity'

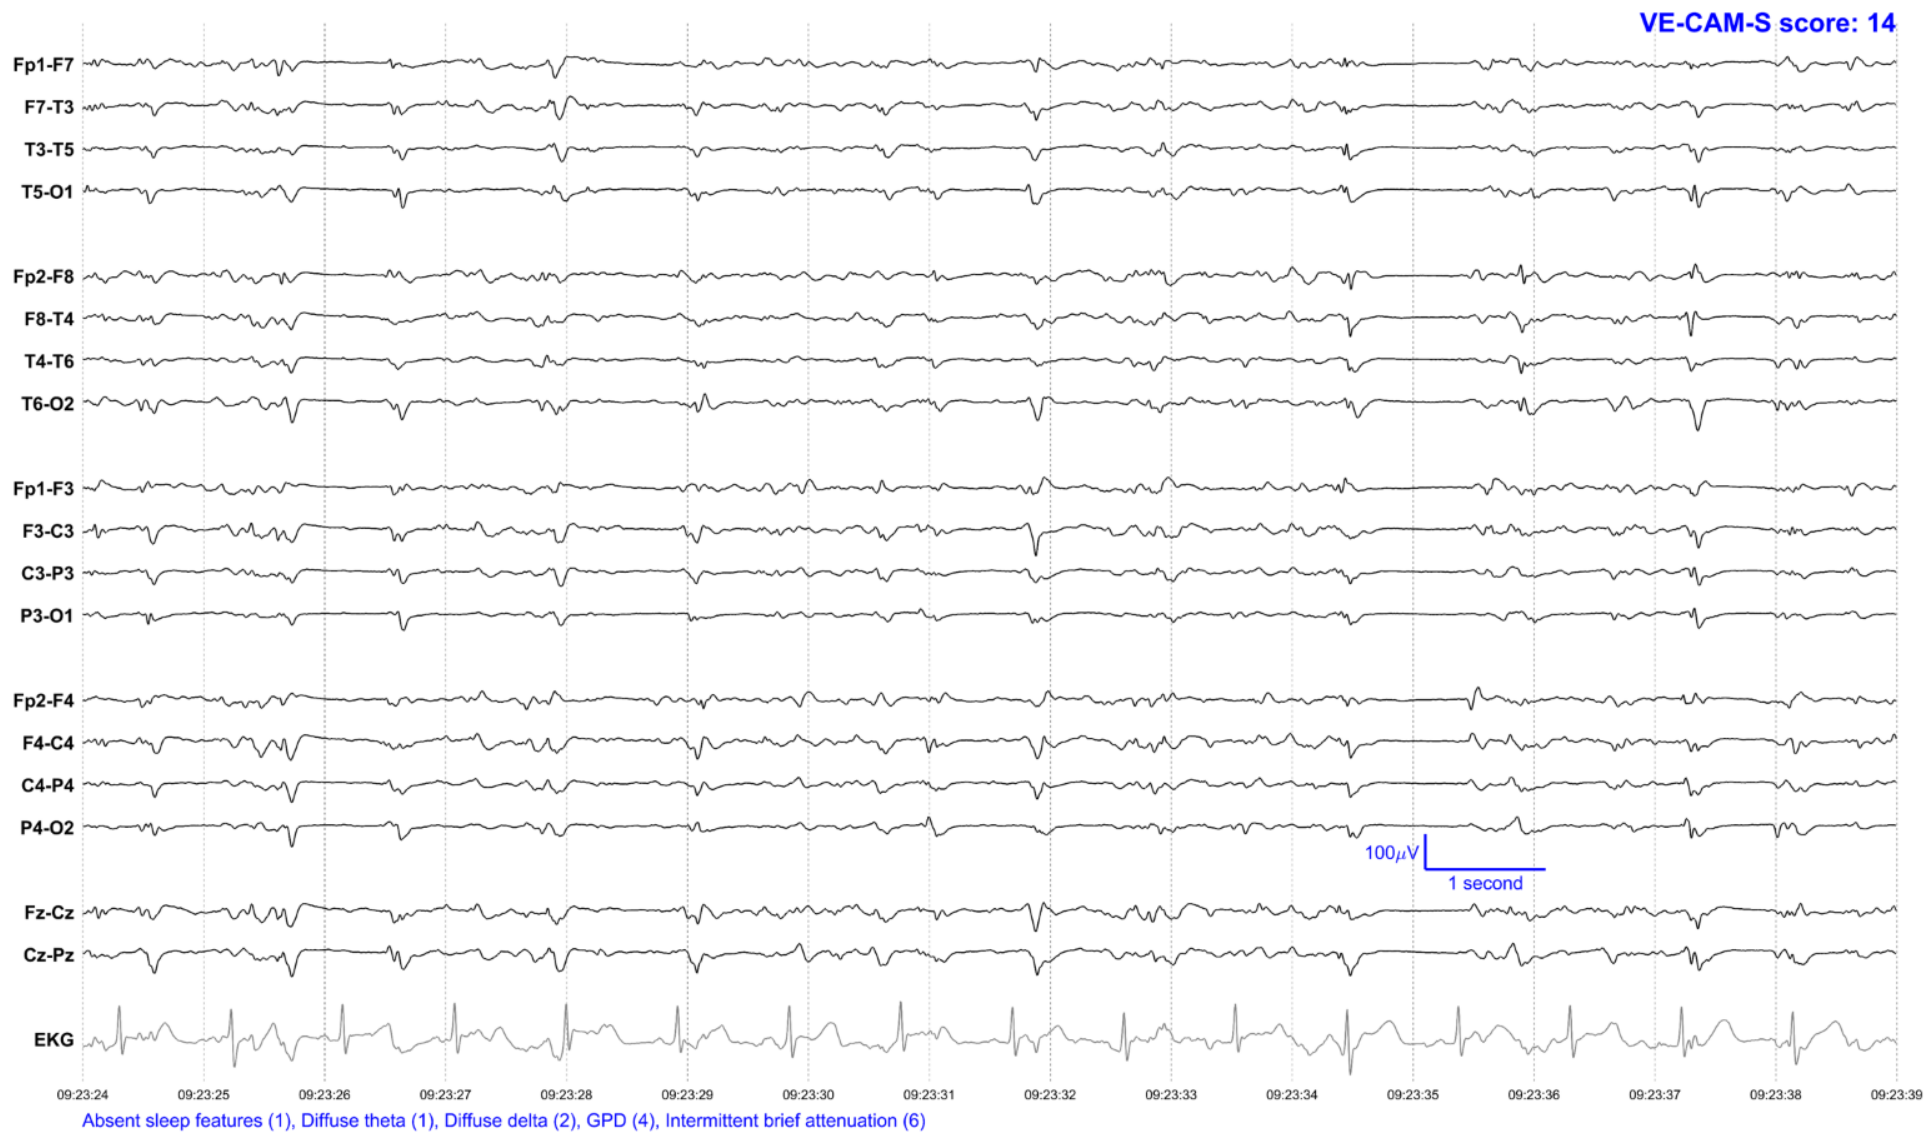

eFigure 47: Example EEG signal for 'High delirium severity'

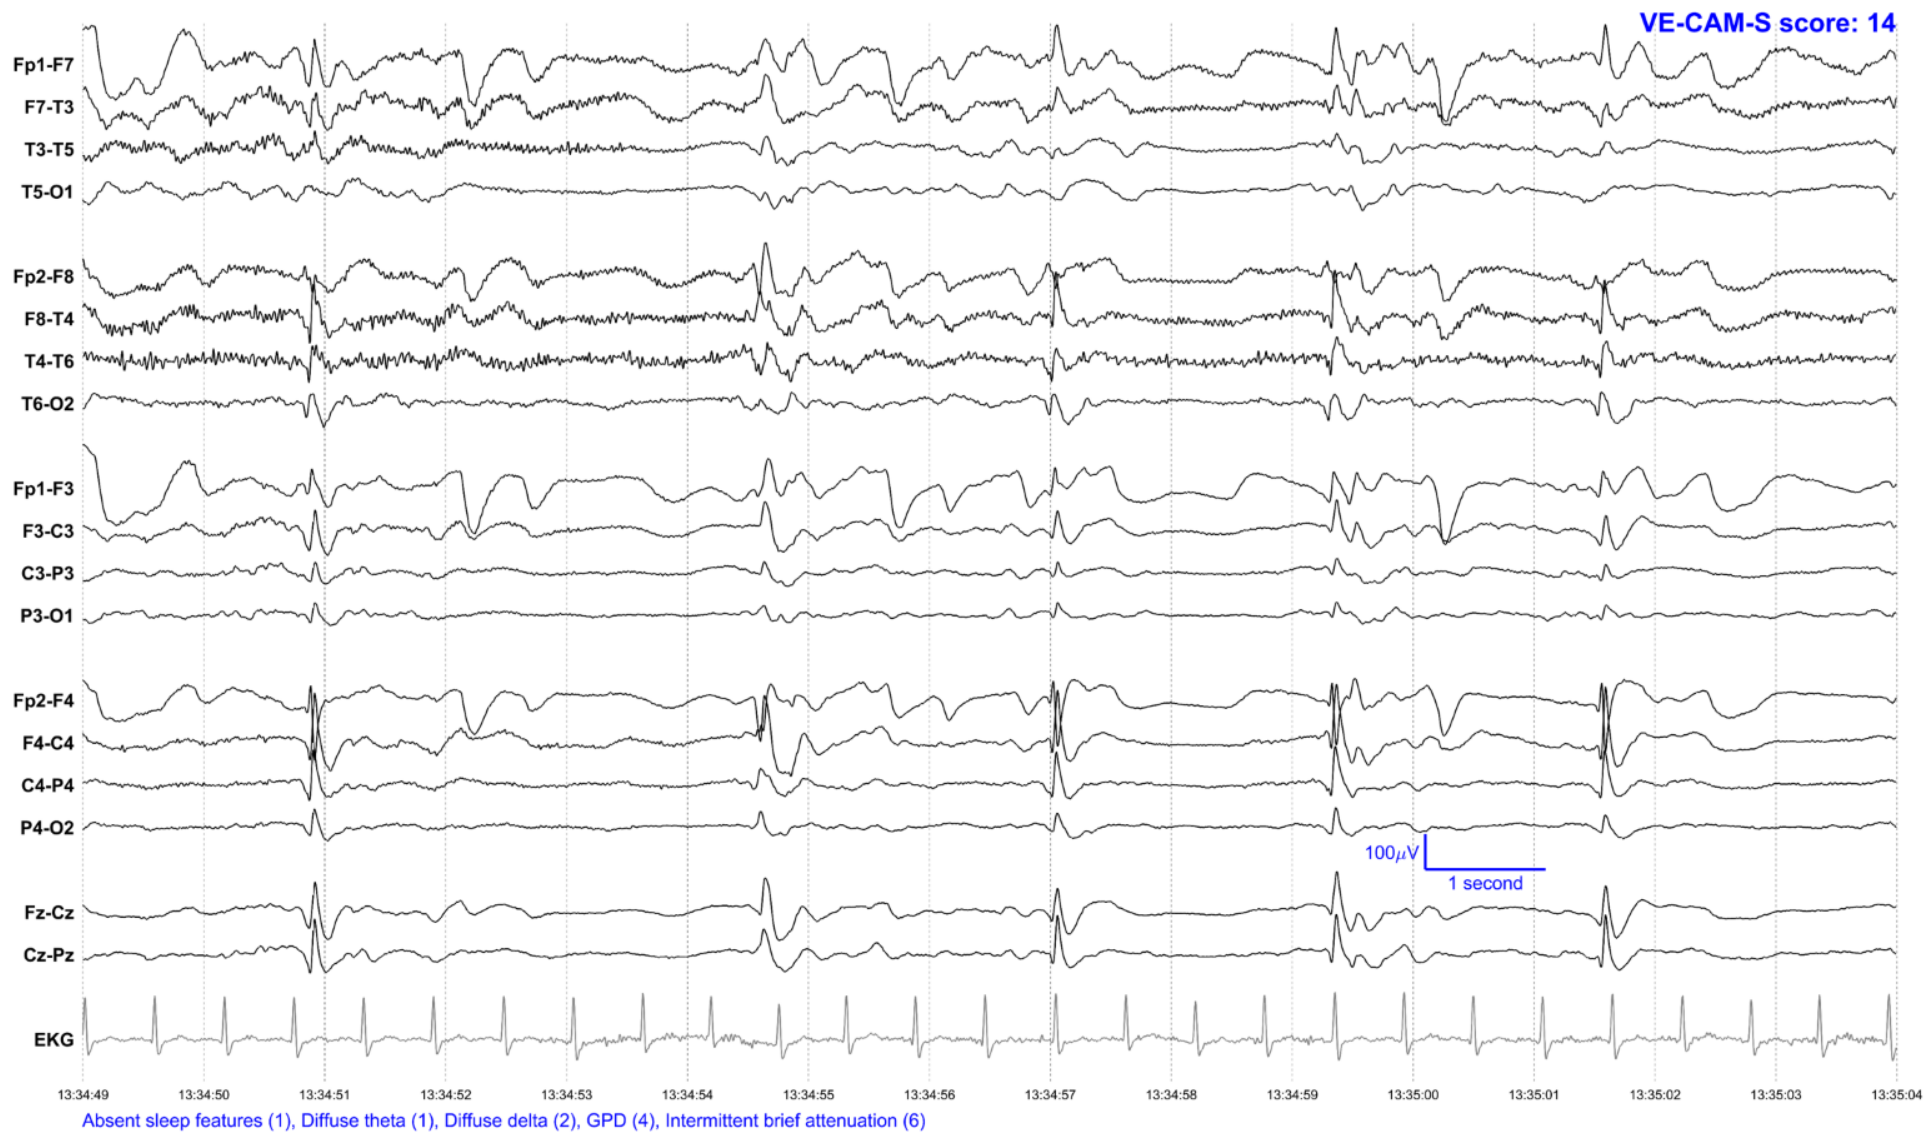

eFigure 48: Example EEG signal for 'Worst delirium severity'

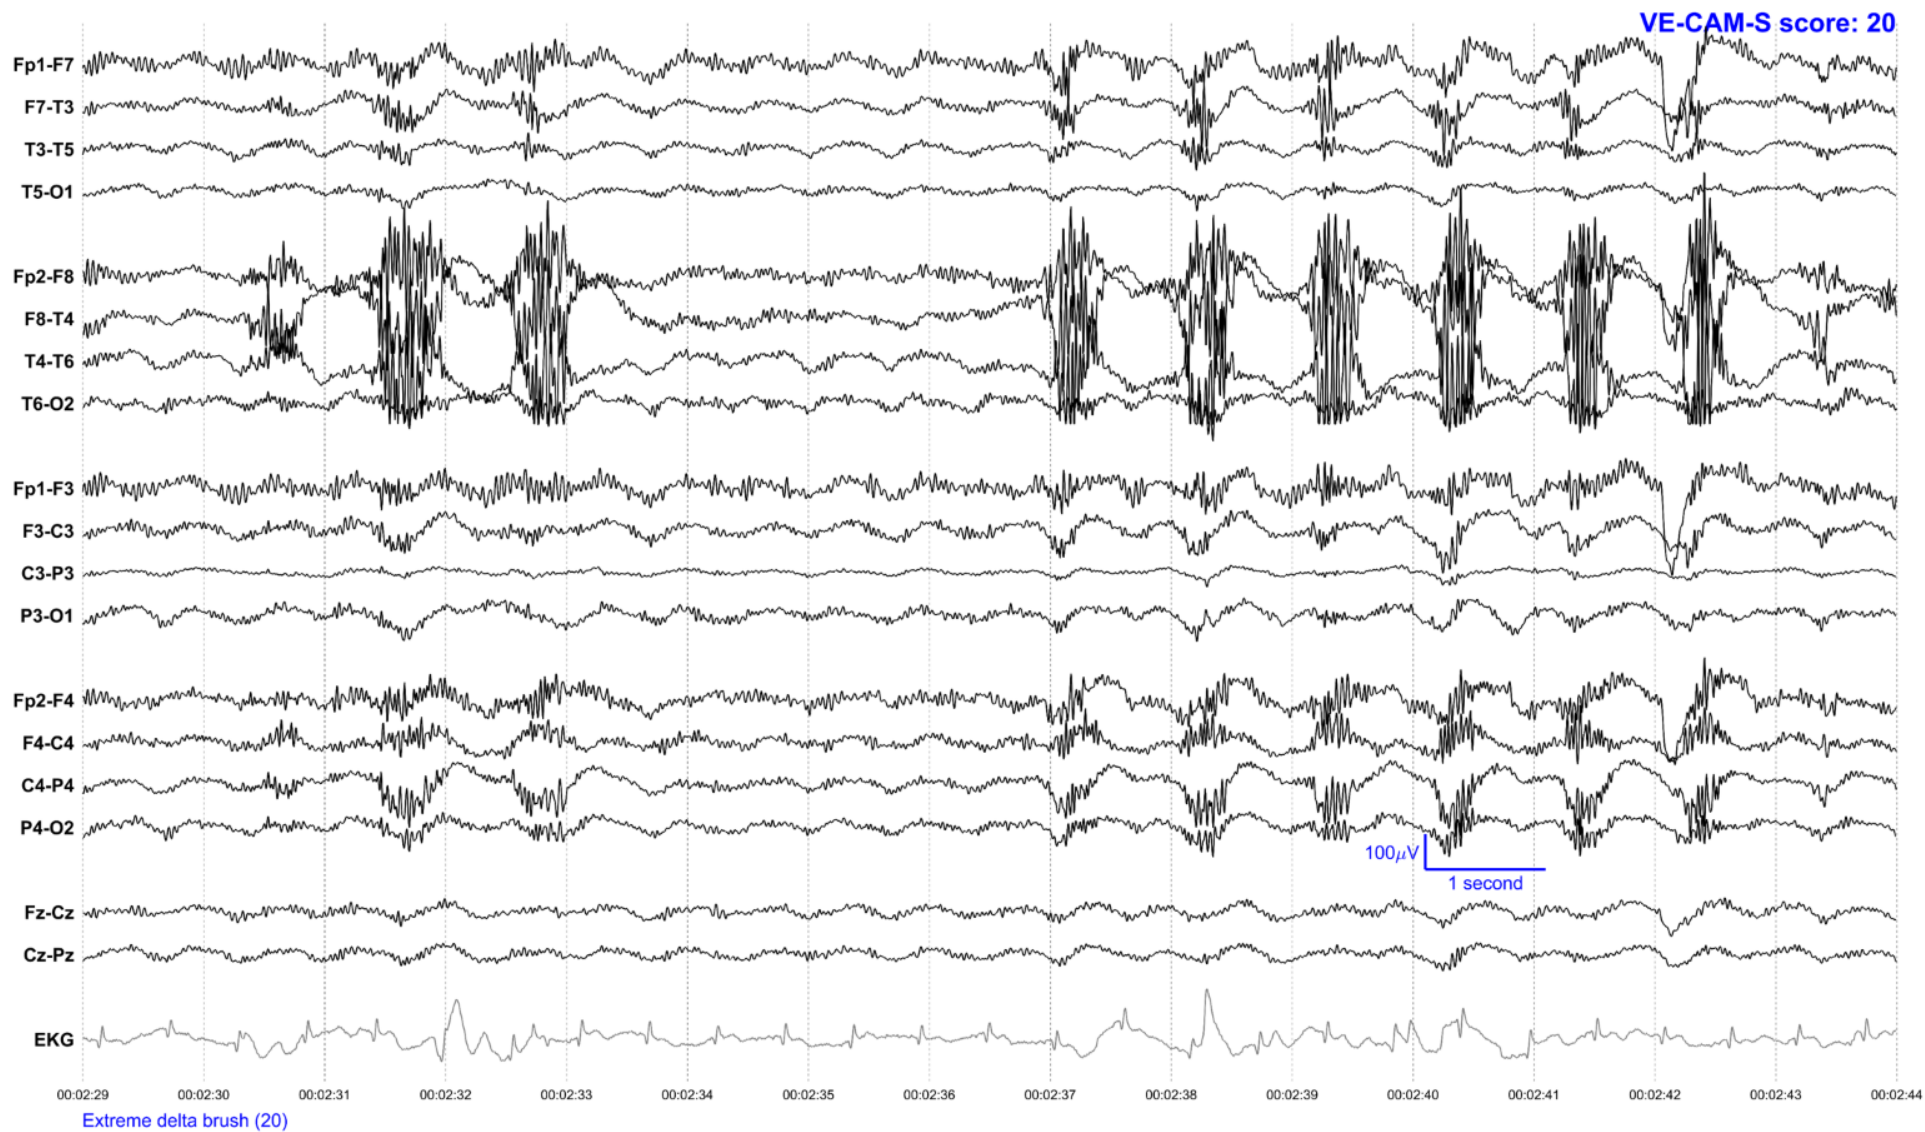



eFigure 49: Example EEG signal for 'Worst delirium severity'

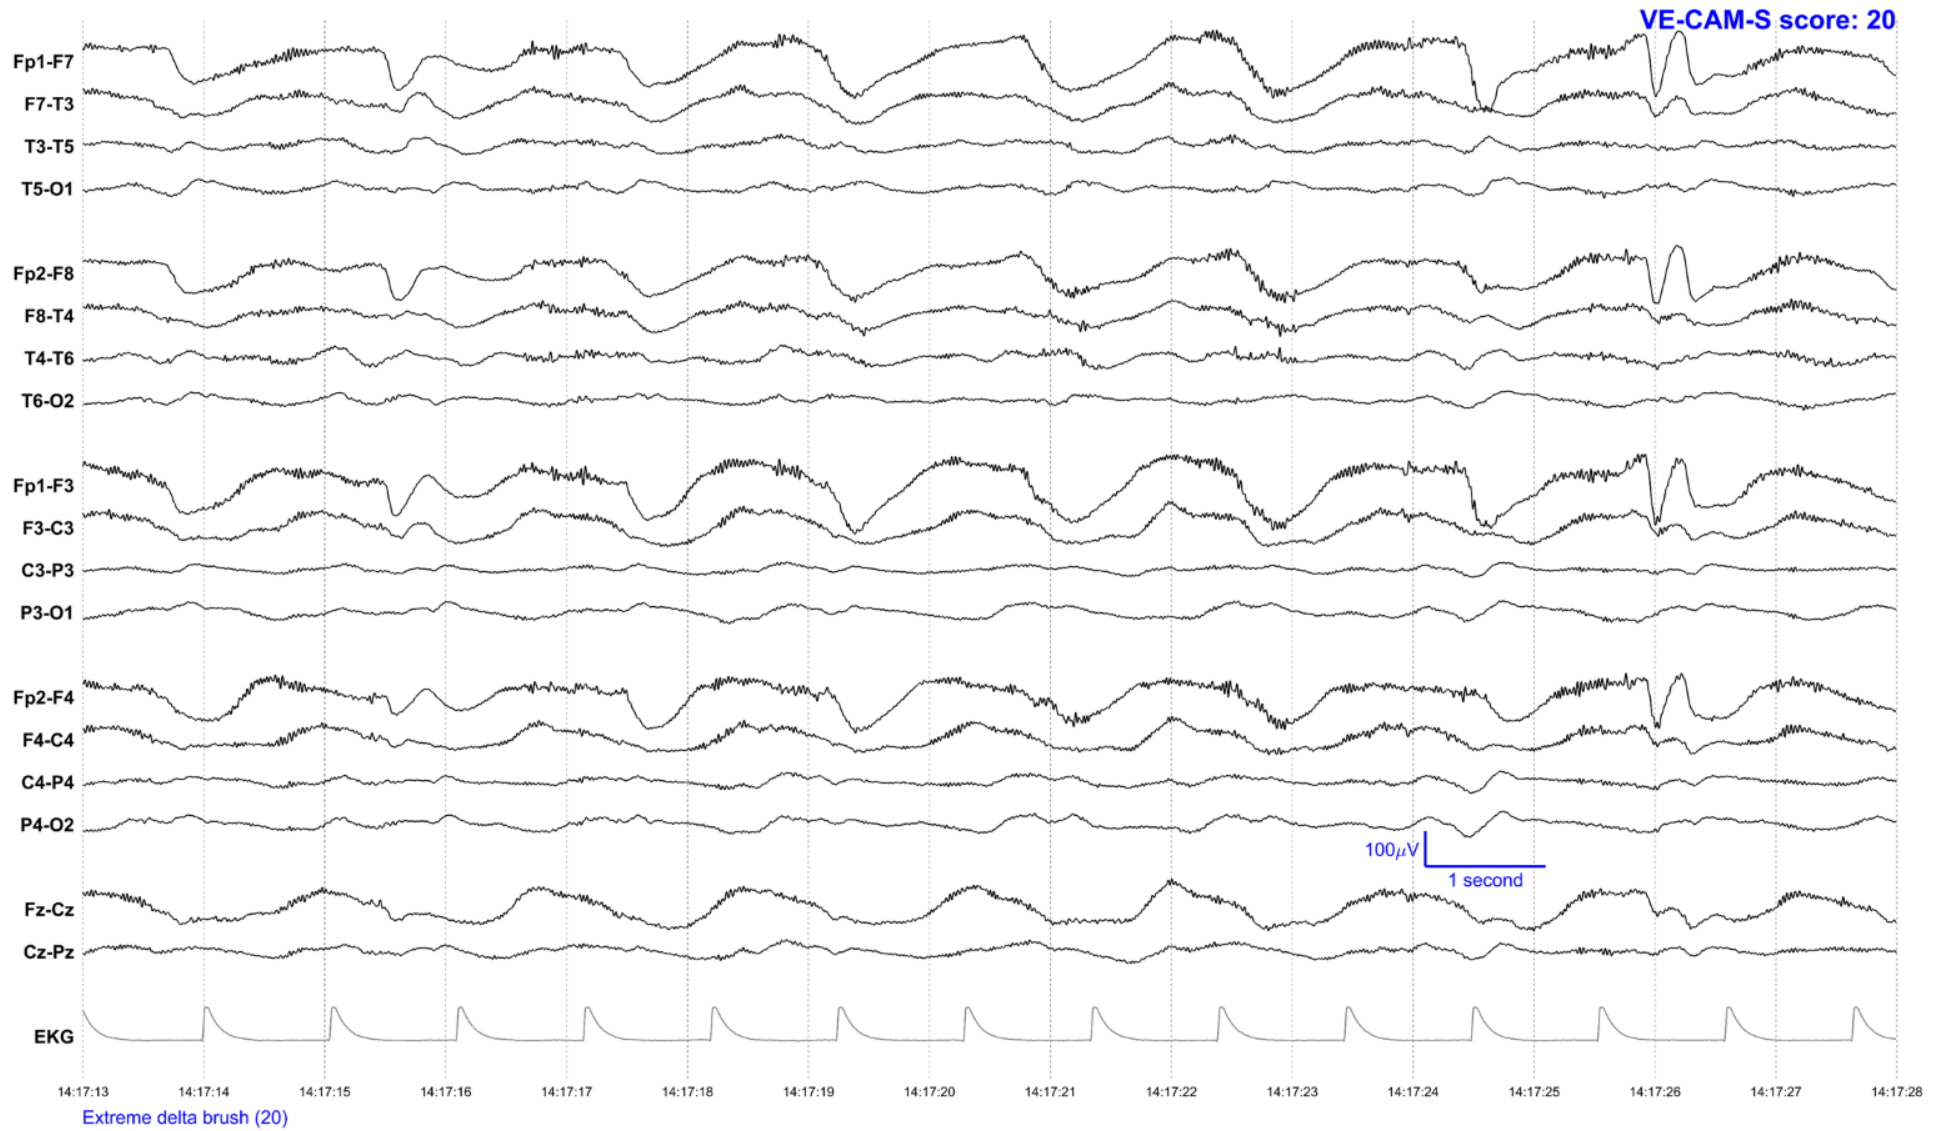

eFigure 50: Example EEG signal for 'Worst delirium severity'

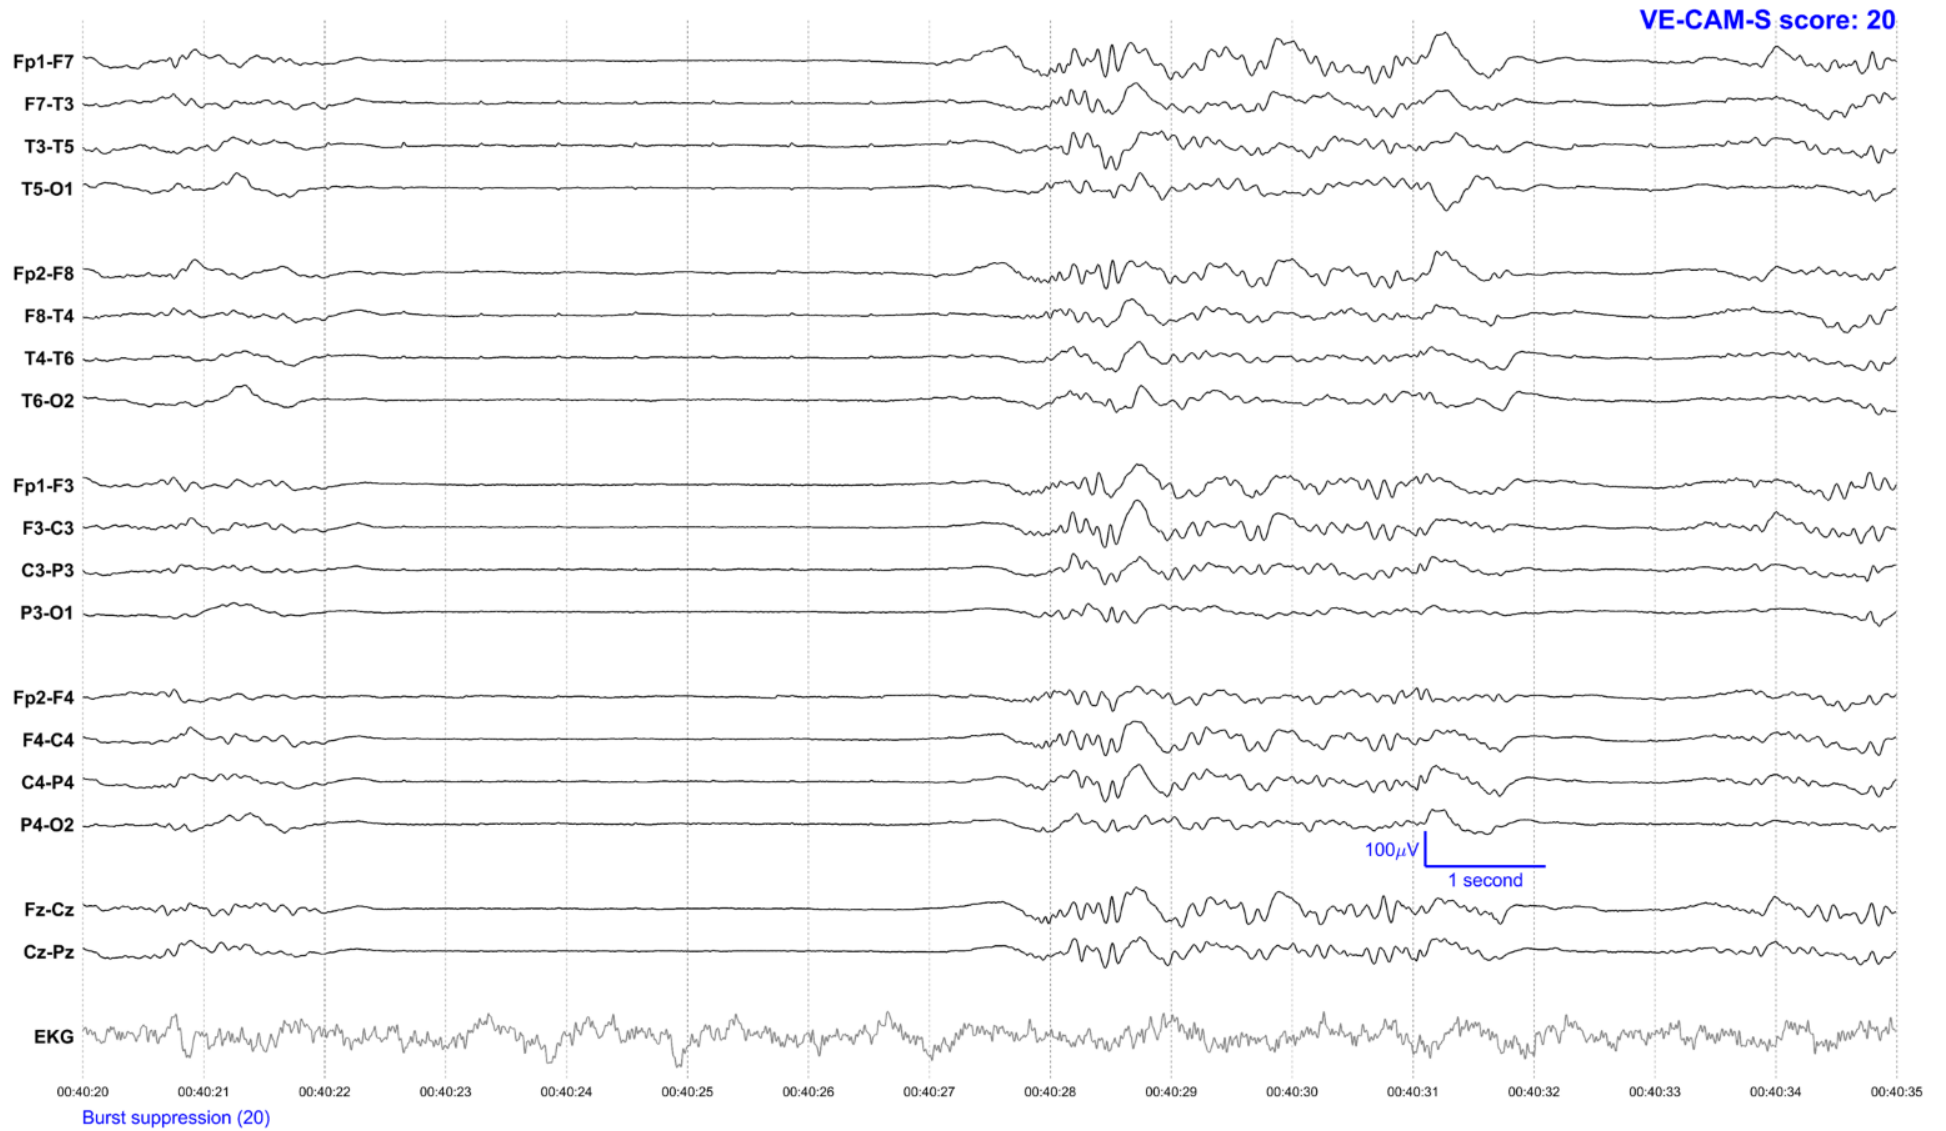

eFigure 51: Example EEG signal for 'Worst delirium severity'

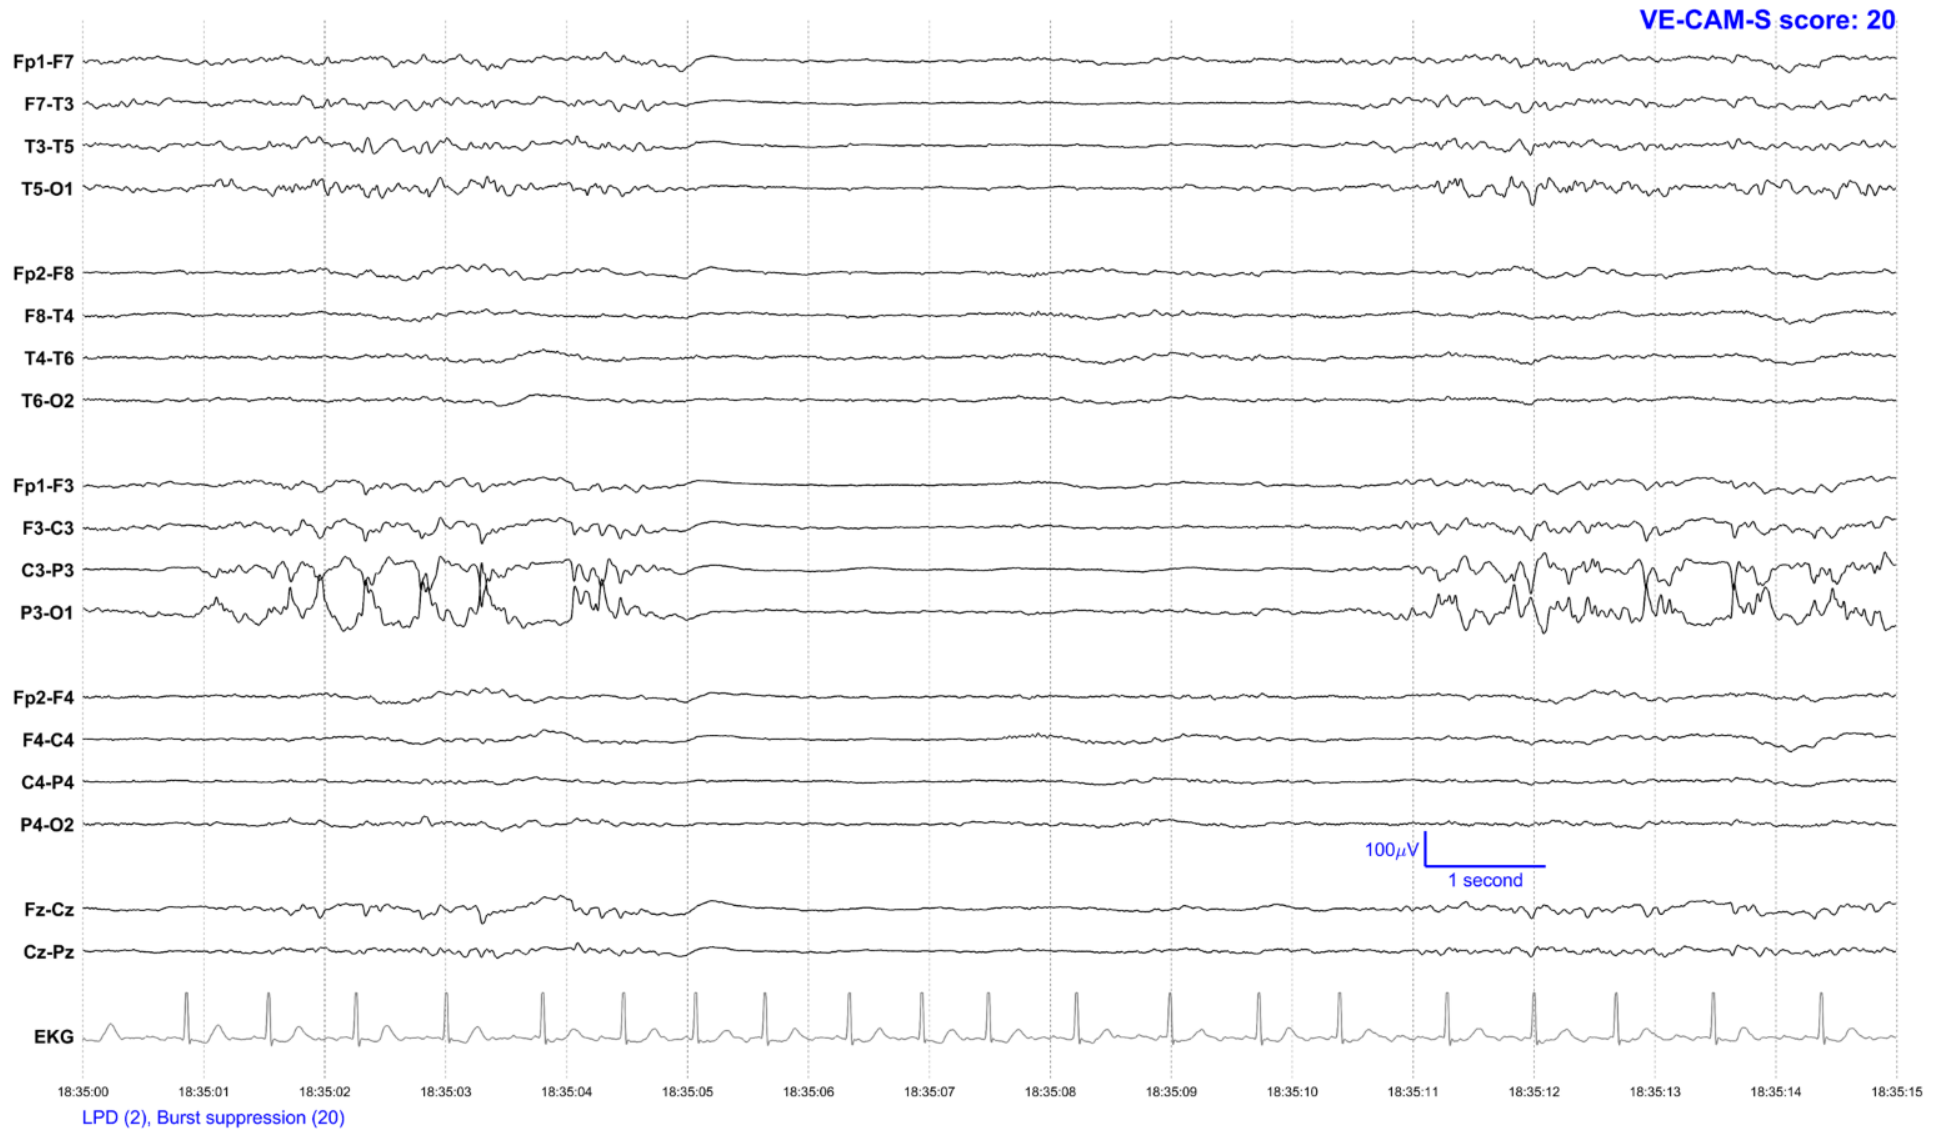

eFigure 52: Example EEG signal for 'Worst delirium severity'

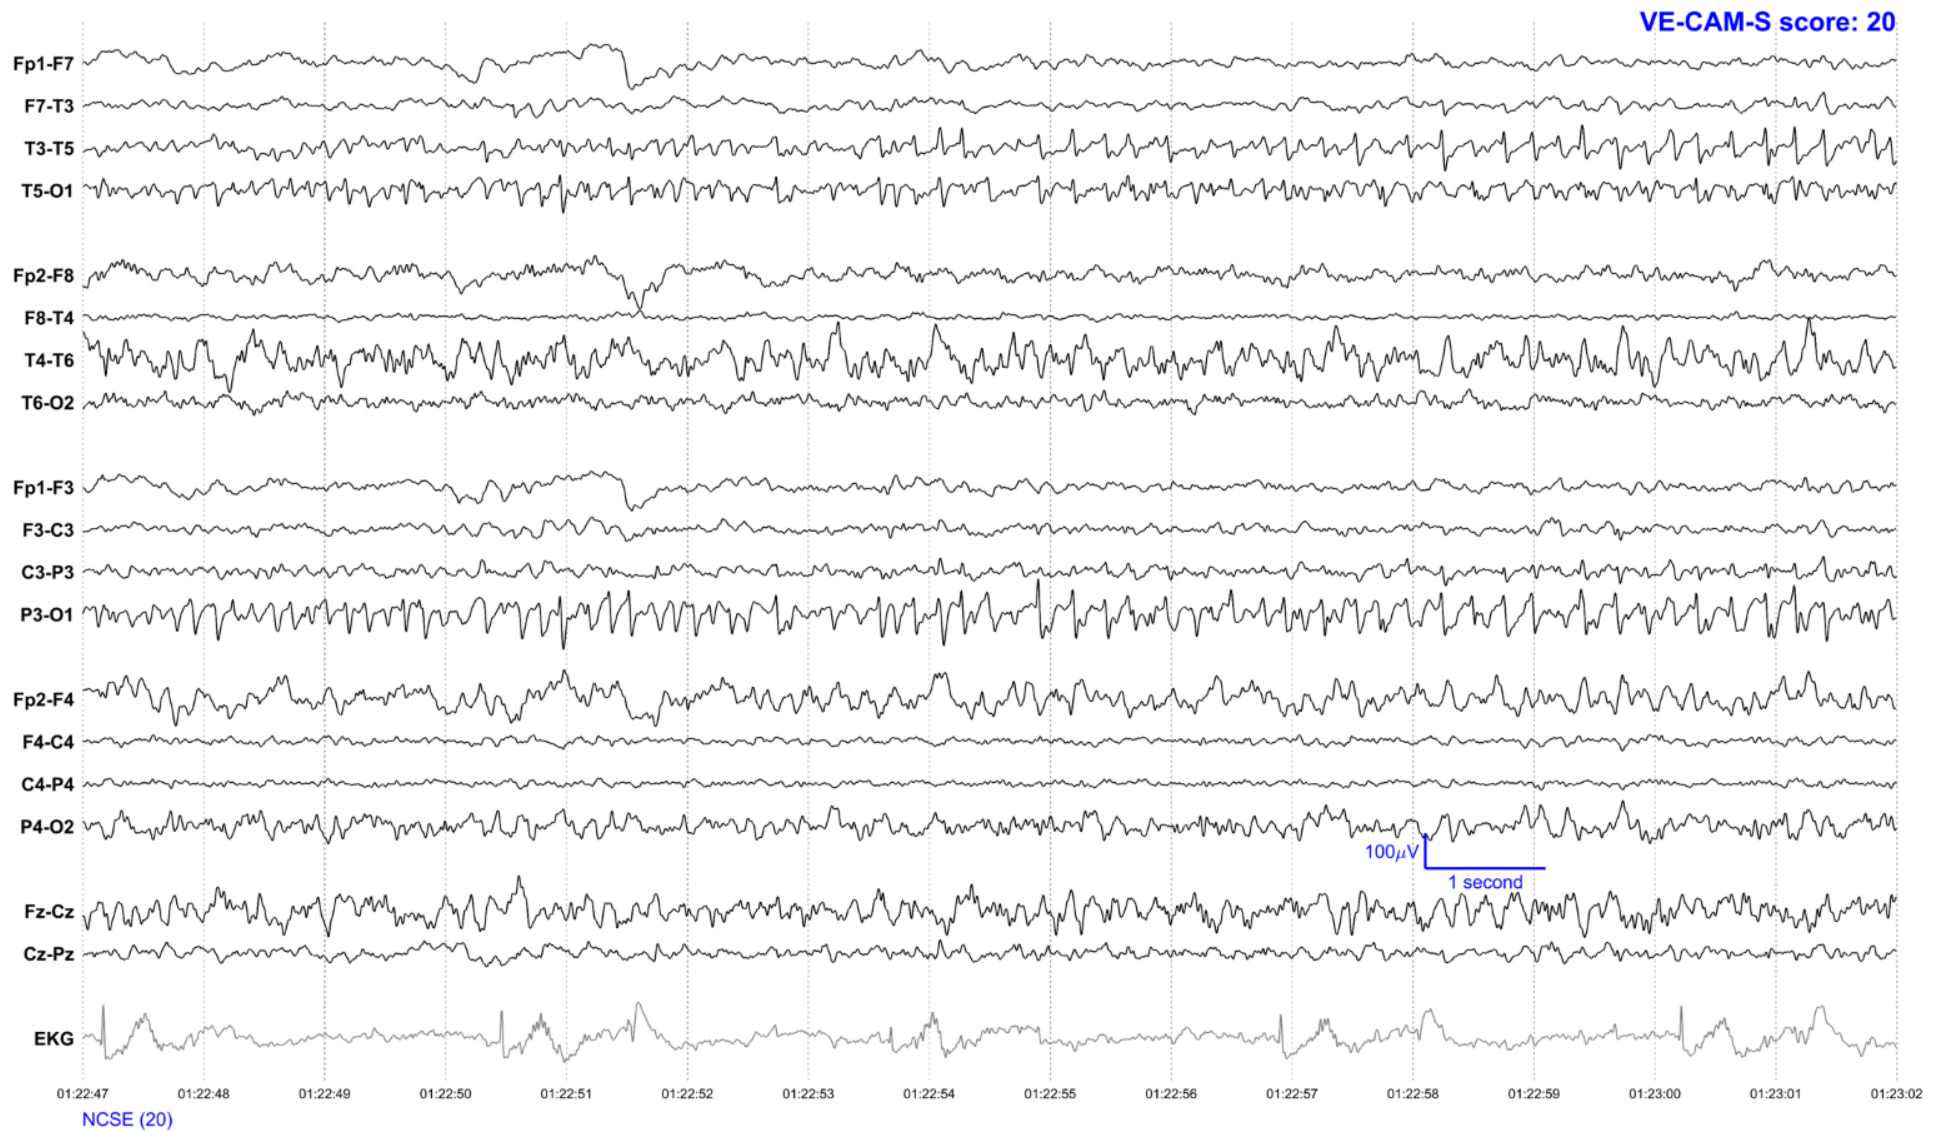

eFigure 53: Example EEG signal for 'Worst delirium severity'

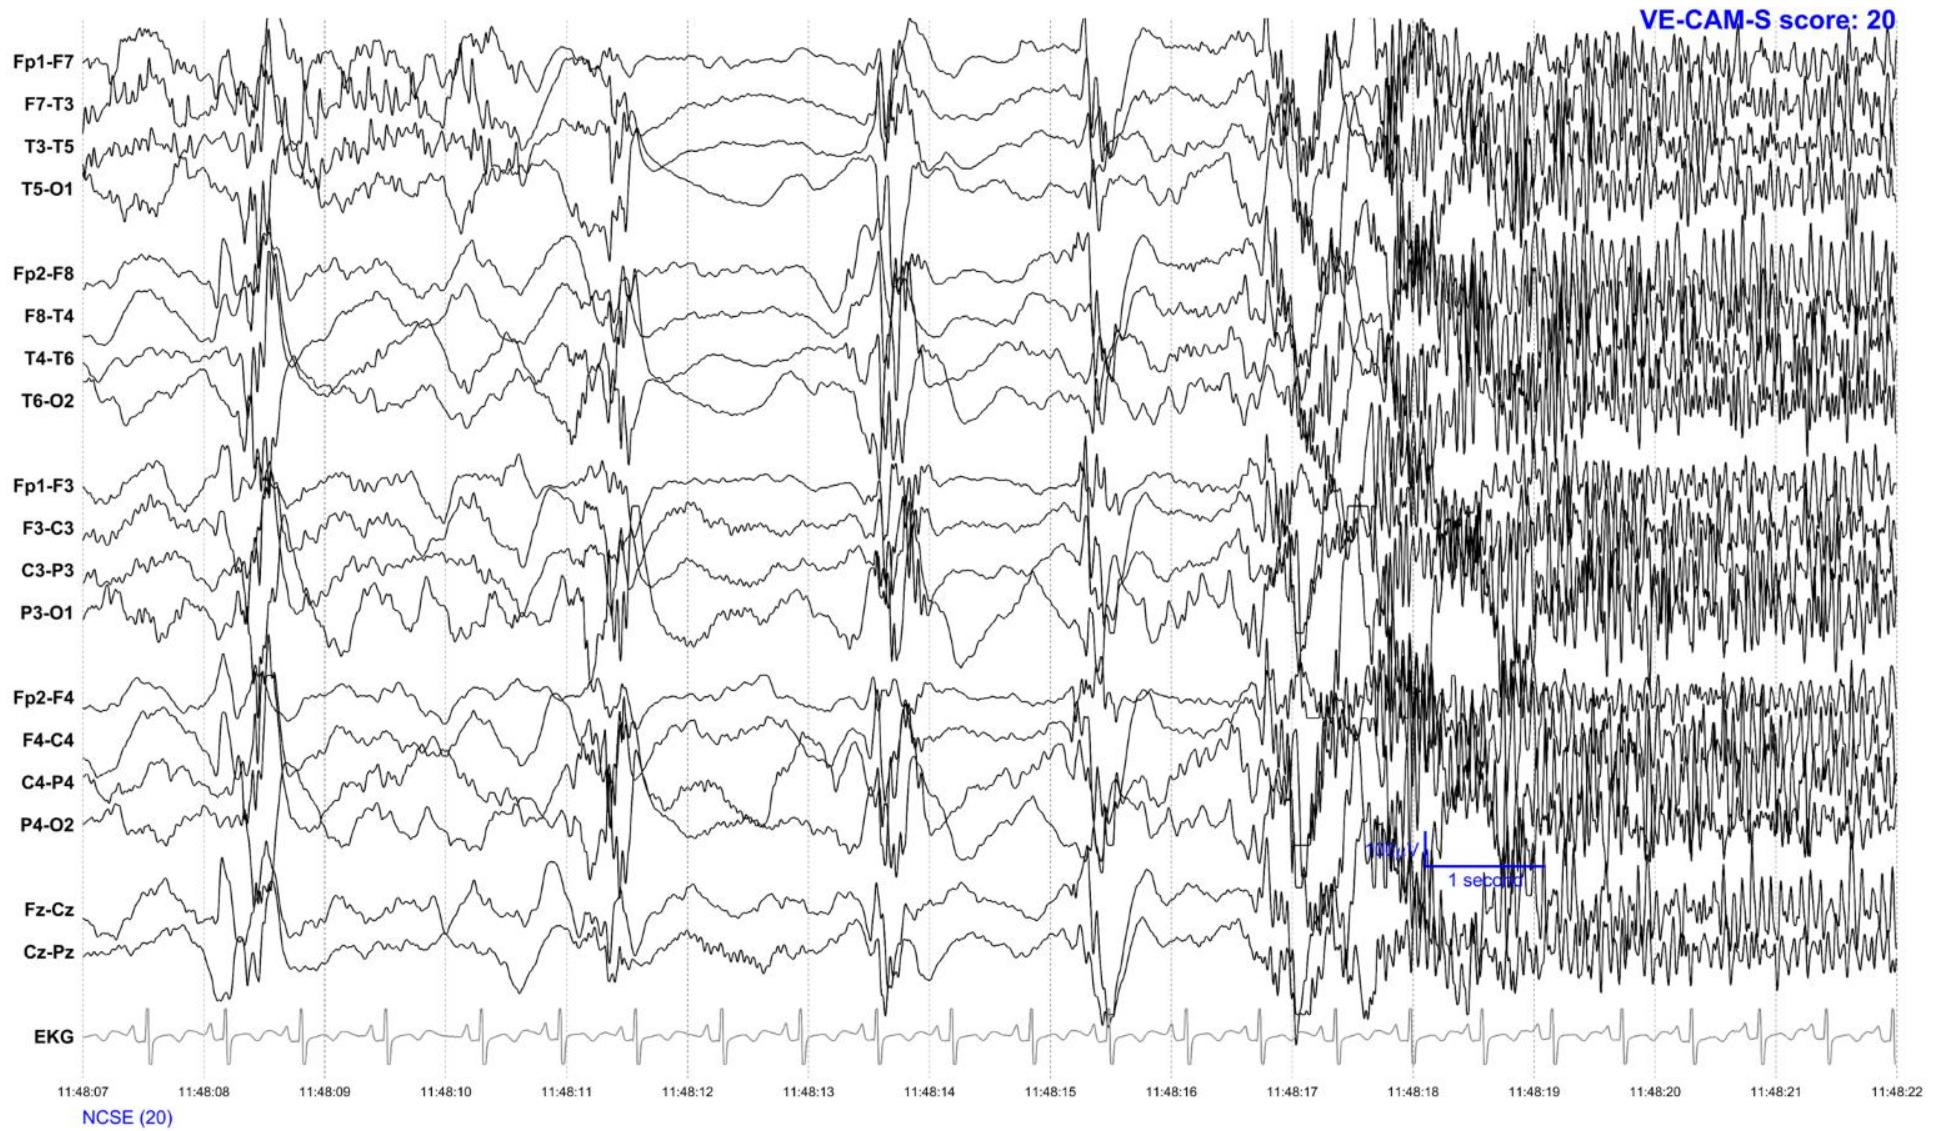

eFigure 54: Example EEG signal for 'Worst delirium severity'

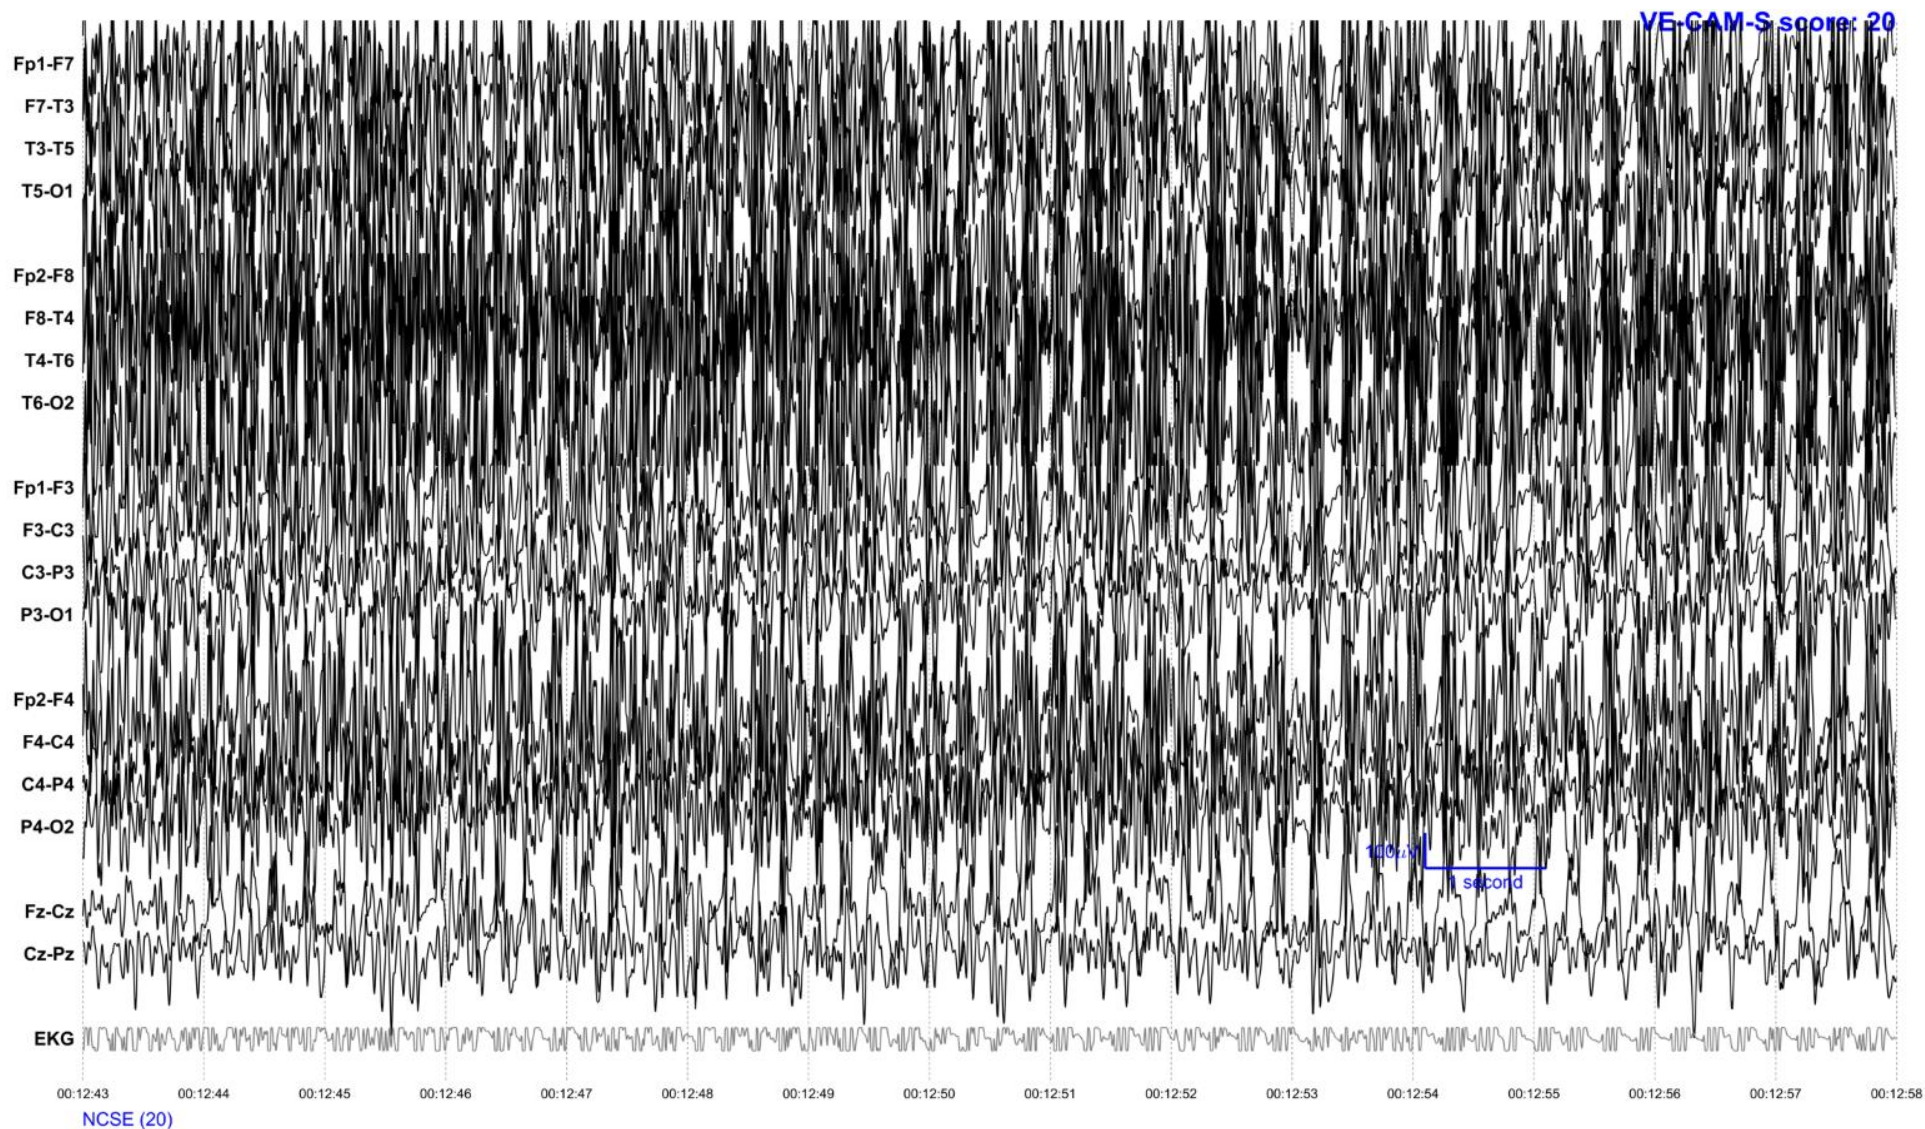

eFigure 55: Example EEG signal for 'Worst delirium severity'

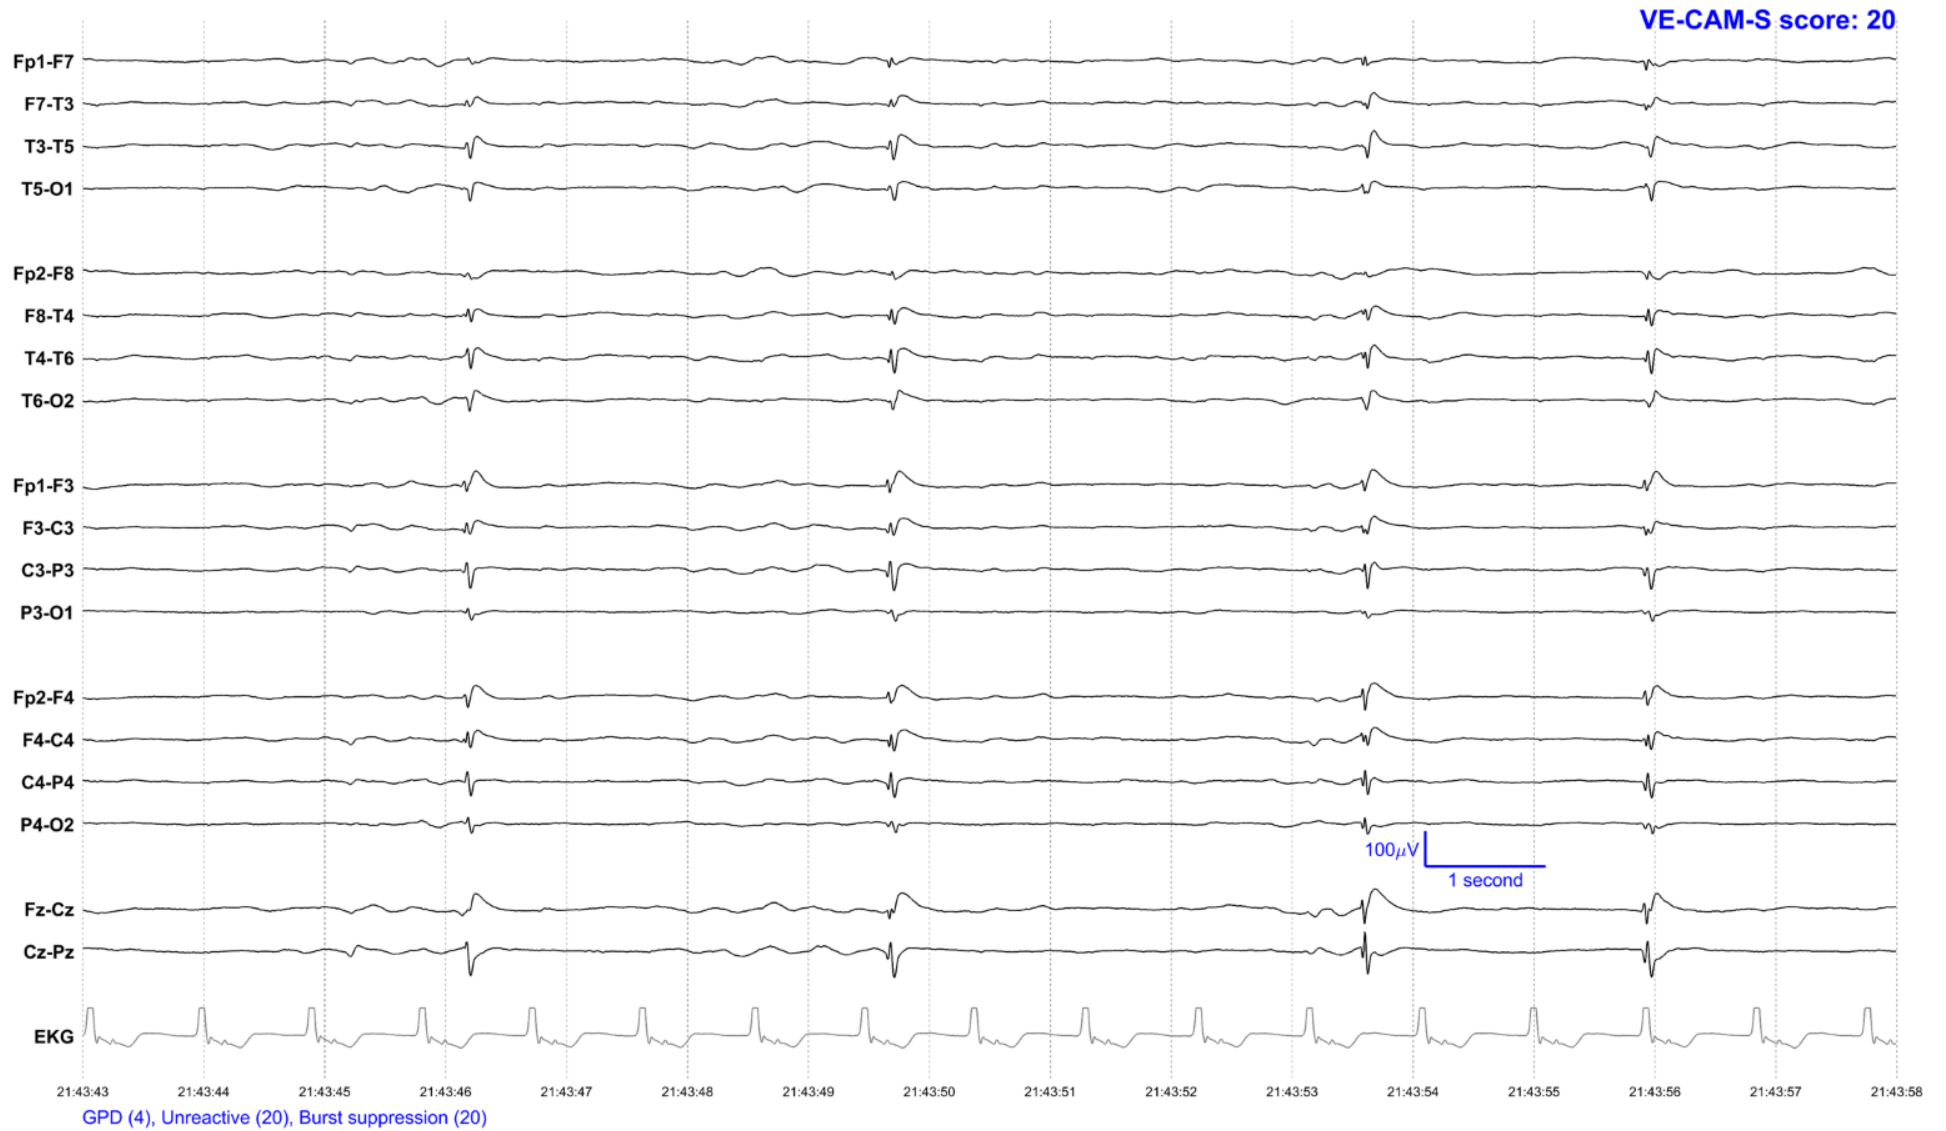

eFigure 56: Example EEG signal for 'Worst delirium severity'

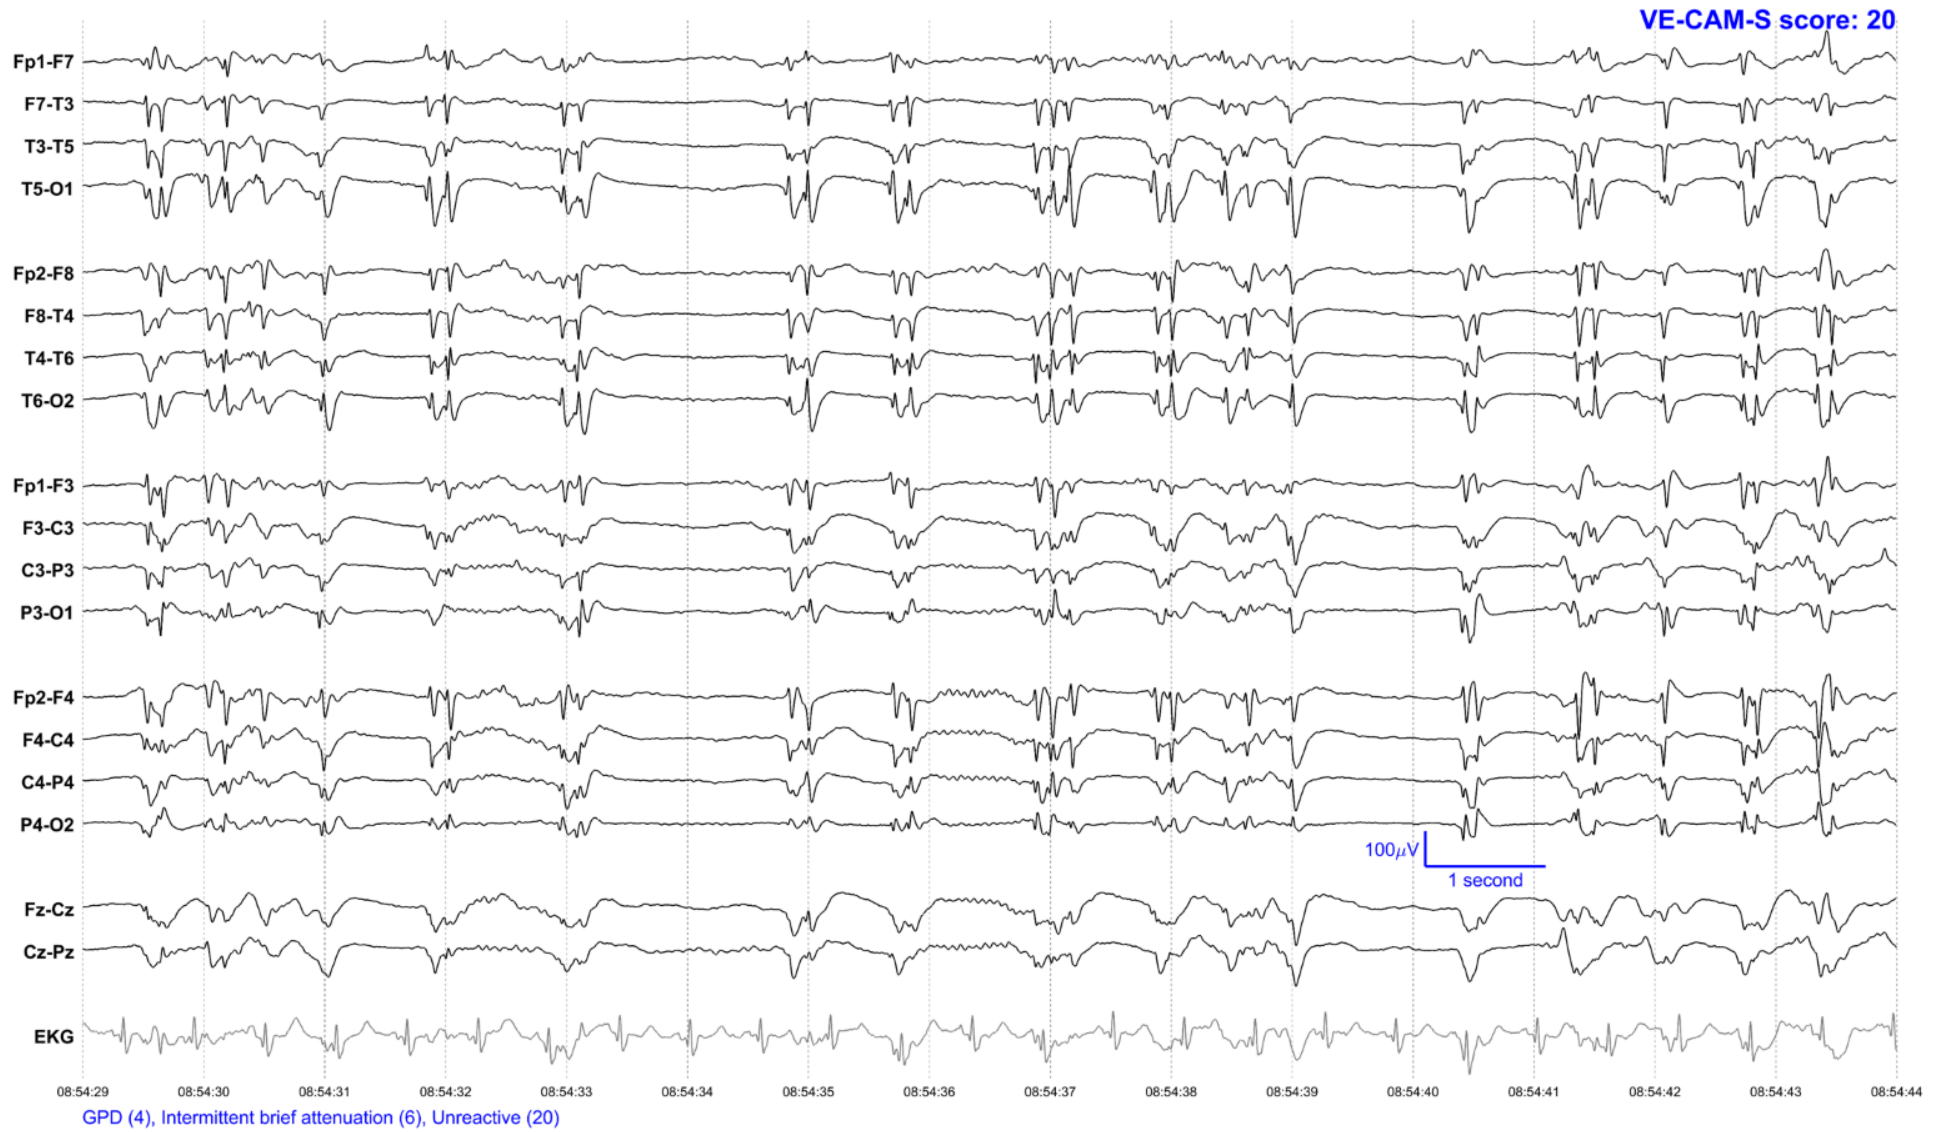



eFigure 57: Example EEG signal for 'Worst delirium severity'

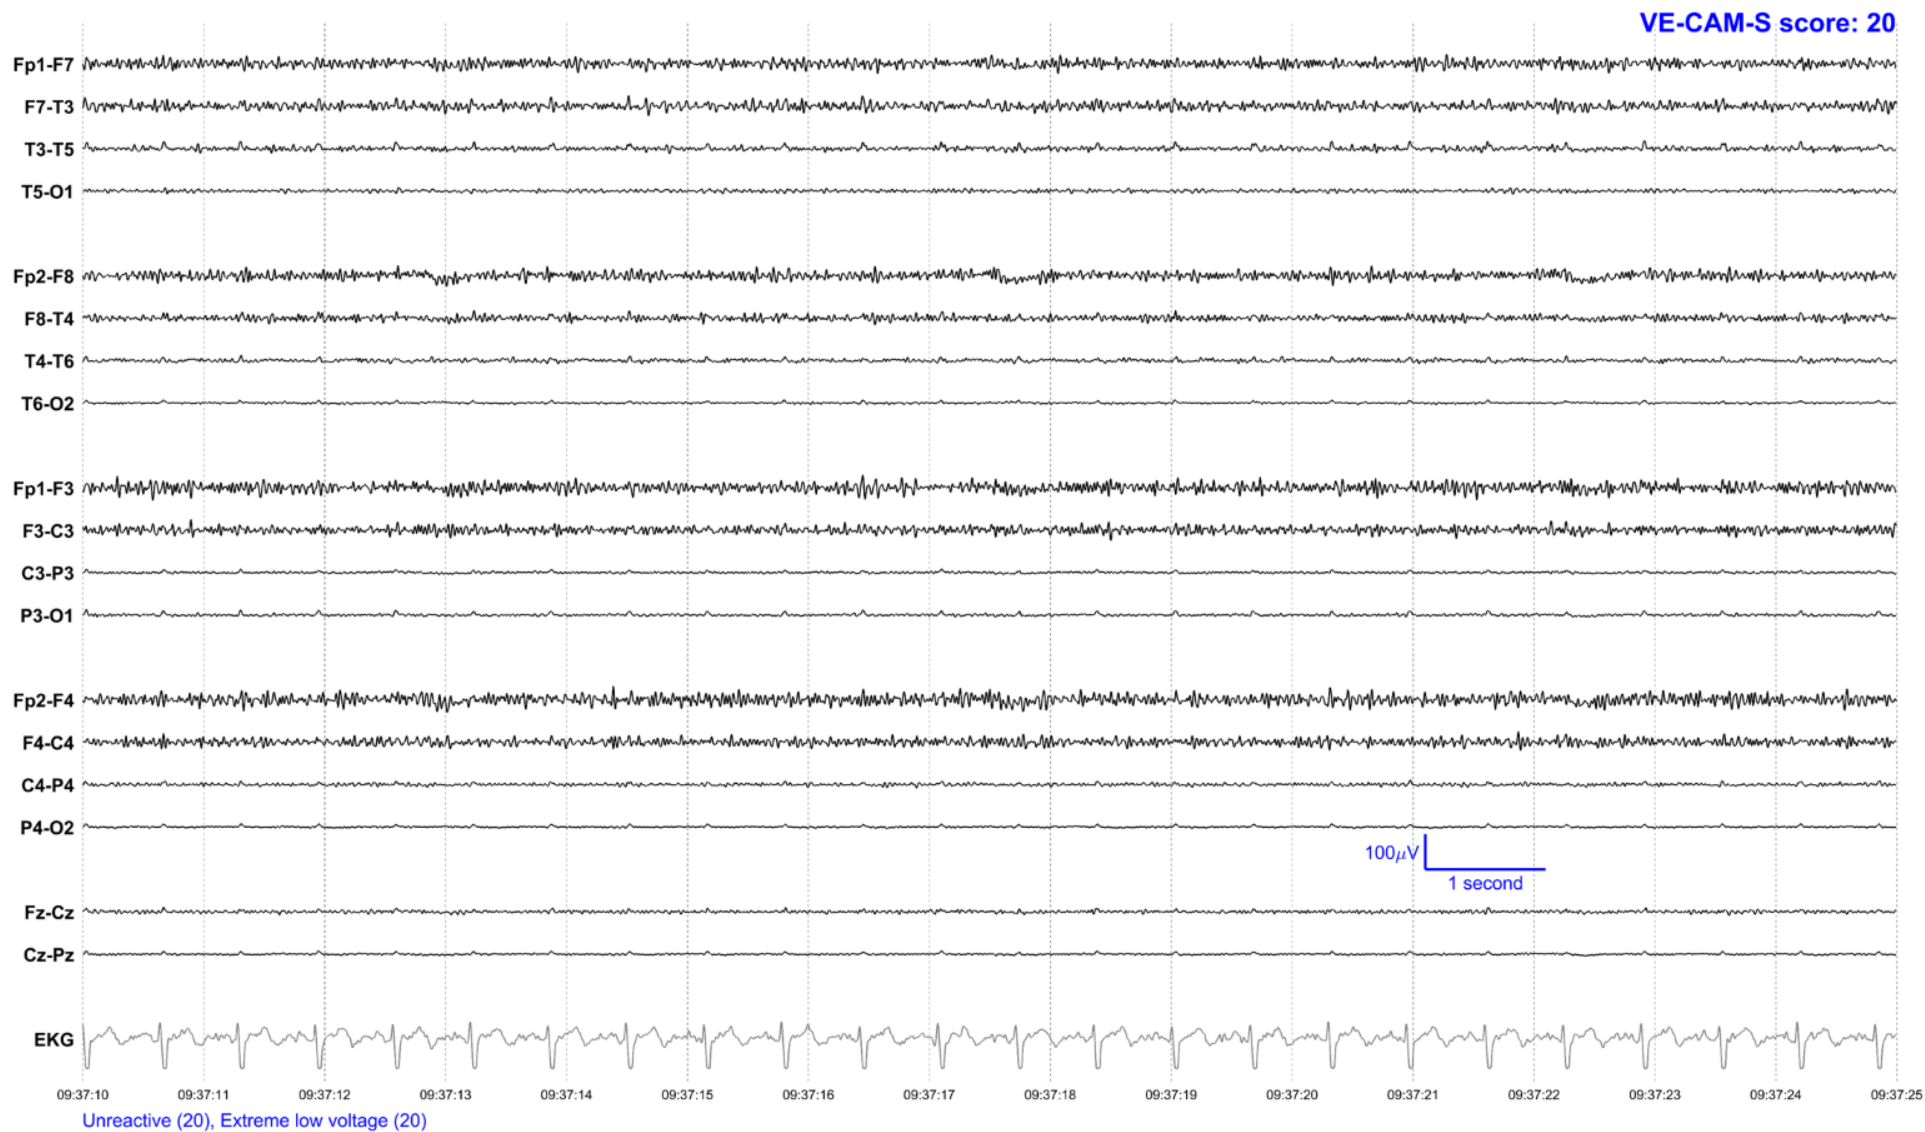

eFigure 58: Example EEG signal for 'Worst delirium severity'

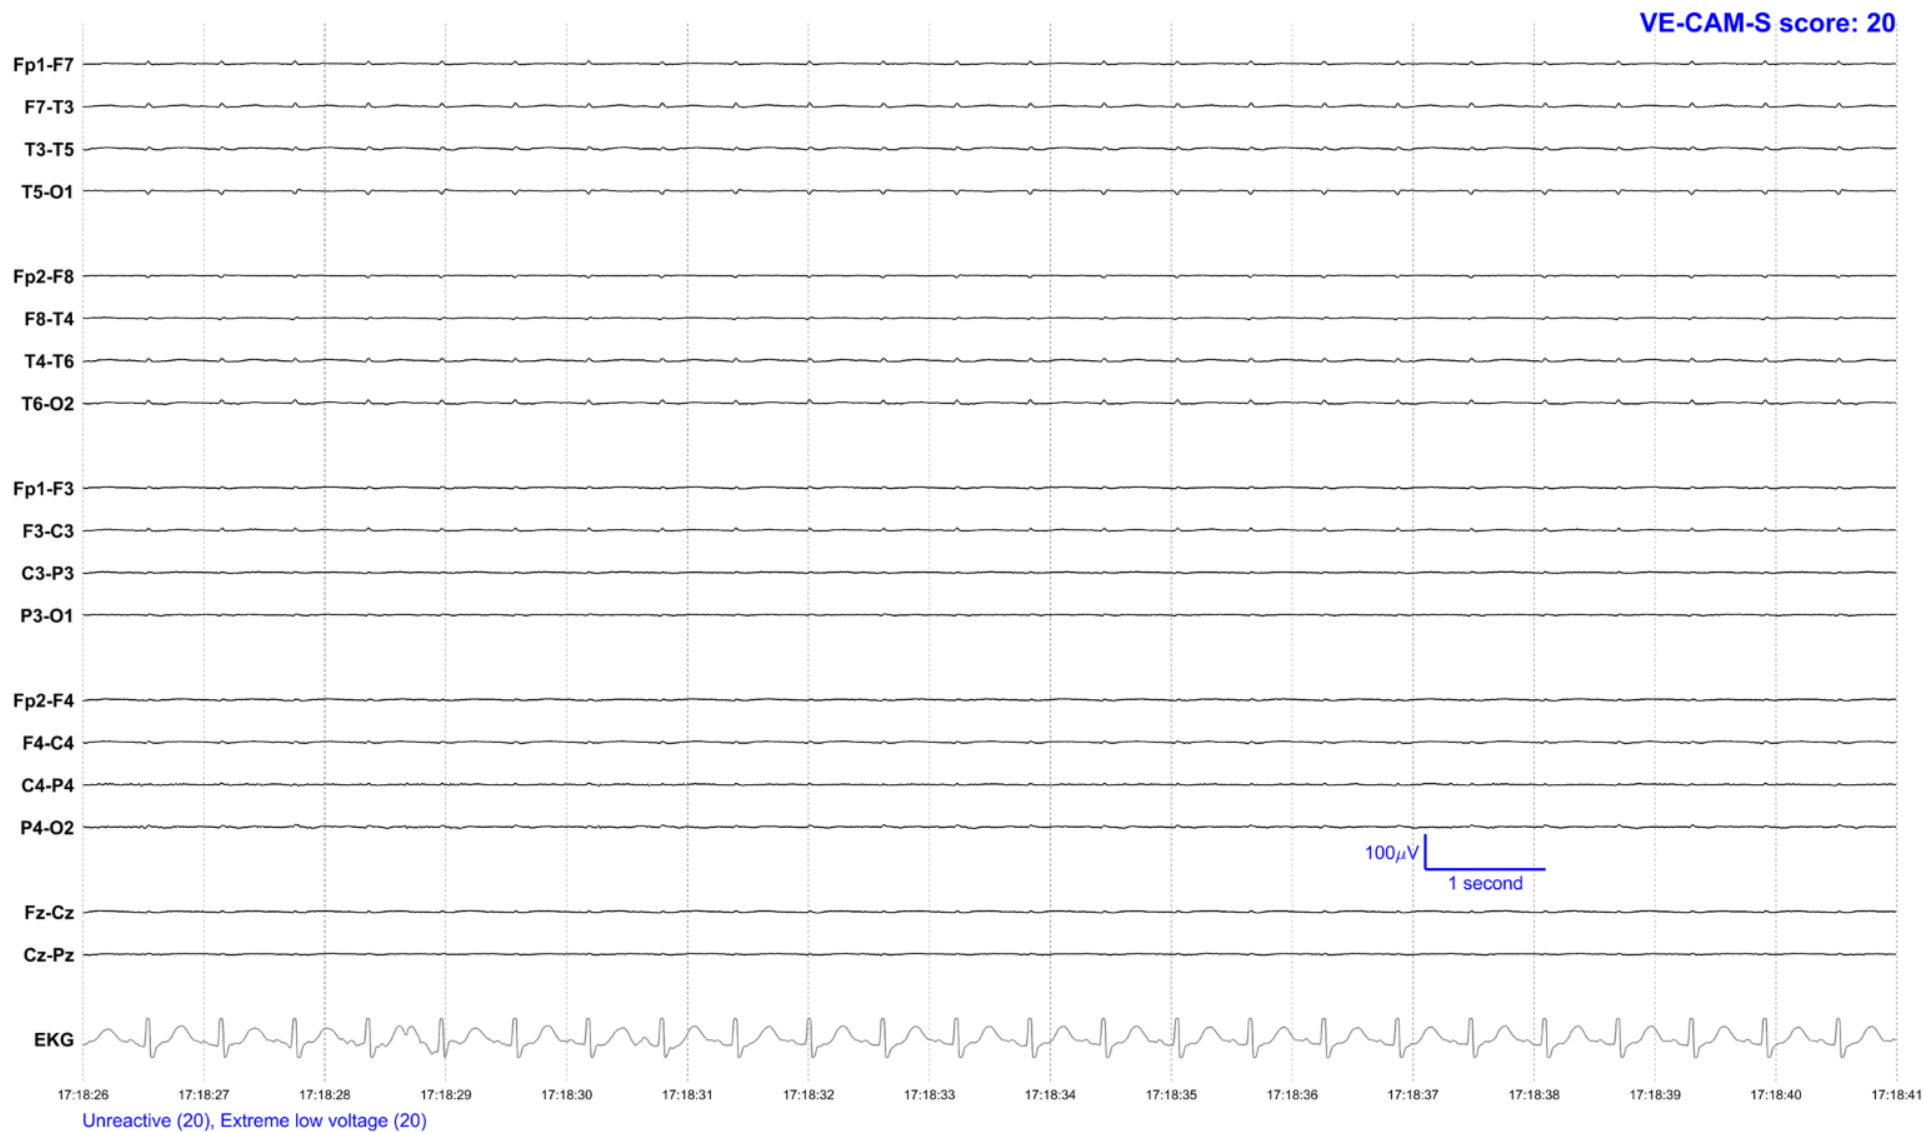

Supplement: cc9-4-e0611-s001.pdf [file cc9-4-e0611-s001.pdf]
